# Supplementary material for: The nonlinearity of pupil diameter fluctuations in an insight task as criteria for detecting children who solve the problem from those who do not
Source: Front Psychol. 2023 Jun 23;14:1129355. doi: 10.3389/fpsyg.2023.1129355 (PMC10327553; doi:10.3389/fpsyg.2023.1129355)
Supplement: Supplementary file 4 [file Data_Sheet_2.XLSX]

## Sheet: recurrence_rate
Subjects	W1	W2	W3	W4	W5	W6	W7	W8	W9	W10	W11	W12	W13	W14	W15	W16	W17	W18	W19	W20	W21	W22	W23	W24	W25	W26	W27	W28	W29	W30	W31	W32	W33	W34	W35	W36	W37	W38	W39	W40	W41	W42	W43	W44	W45	W46	W47	W48	W49
01N_1AP	0.0227071	0.0274151	0.0234495	0.0232866	0.0306926	0.0421186	0.030258	0.0280127	0.0398823	0.0327026	0.0286374	0.0223268	0.0209325	0.0139611	0.0155998	0.0162879	0.0146039	0.0143051	0.016804	0.0203712	0.0253146	0.0272703	0.0212856	0.0276415	0.0249344	0.0181711	0.0268266	0.0246537	0.0172205	0.0160706	0.015627	0.0145586	0.0145677	0.0138072	0.0184699	0.0332277	0.0361793	0.0564509	0.0616659	0.0455138	0.037483	0.0185514	0.014115	0.0112992	0.0112449	0.0133726	0.0115165	0.0112902	0.0116795
02N_1EP	0.0169941	0.0165505	0.0114713	0.01177	0.0170394	0.0141331	0.013445	0.0150385	0.0154097	0.0201992	0.0999095	0.134151	0.140534	0.167225	0.102725	0.0683296	0.0765233	0.0722861	0.0427162	0.0261838	0.0293255	0.0169579	0.0241105	0.0219647	0.0211951	0.015129	0.0181077	0.014115	0.0188411	0.0253237	0.0317067	0.0310729	0.0283748	0.0365957	0.0365143	0.0403078	0.0429968	0.0696062	0.077311	0.108529	0.106446	0.103848	0.127995	0.101811	0.0626981	0.0592757	0.0465278	0.0449525	0.0362426
03N_2AP	0.0148936	0.0146311	0.0125487	0.0119602	0.0116795	0.0116885	0.0088909	0.00976007	0.0132639	0.0192485	0.0197012	0.0244273	0.029914	0.0290991	0.0335265	0.0305659	0.0245632	0.0249796	0.0174921	0.0149298	0.0148936	0.0137166	0.014115	0.0138162	0.0167134	0.0197737	0.0252965	0.0243368	0.0241286	0.0197284	0.0147216	0.0139611	0.0130285	0.0132911	0.0118062	0.0118425	0.0127931	0.0124038	0.0108375	0.00987777	0.0071435	0.00727026	0.00813943	0.010077	0.0120507	0.0194658	0.0221729	0.0244545	0.0217021
04N_2EP	0.0459846	0.0722861	0.0678044	0.0678407	0.0393572	0.0154278	0.0162155	0.0179176	0.0201811	0.0217112	0.0183341	0.0224355	0.0197918	0.0229425	0.0321503	0.0315708	0.0275962	0.0343685	0.0525668	0.0577275	0.0691263	0.0713445	0.0629244	0.0435944	0.0505749	0.0571752	0.0622363	0.0624083	0.056134	0.0365957	0.0277954	0.0301584	0.025713	0.0328112	0.0348665	0.0315075	0.0319149	0.0267632	0.0164237	0.0186872	0.0356813	0.0506836	0.0660118	0.0551652	0.0749389	0.0652965	0.0566863	0.0523404	0.031091
05N_3AP	0.0652603	0.0564328	0.0266908	0.0247352	0.0324581	0.0446718	0.0382073	0.0382254	0.0385333	0.0249615	0.0299864	0.0459937	0.0430783	0.0615029	0.0435401	0.0290358	0.0322499	0.0362608	0.0382435	0.050593	0.0684292	0.0384789	0.0463196	0.0357266	0.0195201	0.0147306	0.0110457	0.00976913	0.00966048	0.00930738	0.00962426	0.011263	0.0125939	0.0118877	0.00862834	0.0140878	0.0182707	0.0184427	0.0177818	0.0172114	0.00810321	0.0051426	0.00797646	0.00781349	0.0174921	0.0189498	0.01933	0.0174649	0.0133364
06N_3EP	0.0349842	0.0365957	0.03512	0.0352286	0.0232413	0.0143051	0.0167044	0.0169307	0.0199819	0.0248529	0.0366229	0.0458397	0.0512087	0.0514984	0.0613038	0.0556541	0.0622816	0.110294	0.175337	0.113264	0.104174	0.0943775	0.0406609	0.030412	0.0205976	0.0321503	0.0340697	0.0348212	0.0328384	0.0320869	0.0272159	0.031761	0.033273	0.0390041	0.0420643	0.0593391	0.0626166	0.0945224	0.0993843	0.117854	0.167542	0.173056	0.0645088	0.0787868	0.0647714	0.0357447	0.0536713	0.0655591	0.0738434
07N_4AP	0.0179357	0.0188954	0.0133726	0.0133182	0.0114169	0.00746944	0.00753282	0.0138977	0.0167587	0.0190131	0.0196469	0.0192395	0.0137076	0.0148665	0.0171299	0.0249072	0.0252331	0.0288275	0.0269986	0.0166229	0.0113626	0.0133635	0.0152105	0.0207786	0.0228248	0.0262472	0.0317248	0.0316433	0.0234857	0.0326301	0.0253689	0.0213581	0.0291263	0.049742	0.0493617	0.0607786	0.0414667	0.0171118	0.0138162	0.0160887	0.0105749	0.0124853	0.0170032	0.018144	0.0200453	0.0217927	0.0183431	0.0124491	0.0132911
08N_4EP	0.00516976	0.00411046	0.00415573	0.00392033	0.00328656	0.003866	0.00486193	0.00580353	0.00621096	0.00621096	0.00623812	0.00532368	0.00488004	0.00499774	0.00569488	0.00701675	0.00852875	0.00920779	0.0100226	0.00844726	0.00928927	0.00793119	0.0064373	0.00592123	0.00622906	0.00572205	0.00602082	0.00619285	0.00593934	0.00600272	0.00611136	0.0067904	0.00775917	0.00699864	0.00801268	0.00764147	0.00808511	0.00722499	0.00604799	0.00685378	0.00612947	0.00565867	0.00519692	0.00649163	0.00648257	0.00731553	0.00770484	0.00775917	0.00580353
09N_1EC	0.020498	0.0119058	0.00997737	0.0123314	0.0114169	0.0120598	0.0119239	0.010928	0.00915346	0.0123585	0.0135355	0.0159167	0.0160163	0.0173925	0.0210774	0.0194387	0.0205794	0.02823	0.0186419	0.0230783	0.0205432	0.0221367	0.016469	0.0142961	0.00820281	0.00612042	0.00701675	0.0102671	0.0140335	0.0197465	0.0216478	0.0243187	0.020498	0.0169851	0.0172476	0.0180806	0.0247714	0.0222635	0.0319058	0.0329923	0.0215392	0.0230059	0.0242825	0.0236306	0.0241829	0.0162517	0.00992304	0.00648257	0.00717972
10N_1AC	0.0134812	0.00915346	0.00755998	0.0108918	0.0111	0.0117881	0.0123947	0.0119602	0.014278	0.0177546	0.0175555	0.0181621	0.0171209	0.0117881	0.00782254	0.00758714	0.0074966	0.00730647	0.0103486	0.0113717	0.0117429	0.0149117	0.0138796	0.0086555	0.00796741	0.00673608	0.00781349	0.00779538	0.00849253	0.0112359	0.0126935	0.0131462	0.0116976	0.00988683	0.00846537	0.00917157	0.0104301	0.0119964	0.0146673	0.0172838	0.0155183	0.0141784	0.0127931	0.0122318	0.0107922	0.00935265	0.0145586	0.0223993	0.0214758
11N_2AC	0.0128474	0.00805794	0.00794024	0.0110005	0.0148574	0.0212494	0.031933	0.0371571	0.0238479	0.0226256	0.017646	0.016632	0.015962	0.0167768	0.0230421	0.0219919	0.0231145	0.0213219	0.0297782	0.0324762	0.0287189	0.029081	0.0392033	0.0259303	0.029588	0.0284473	0.0203893	0.0147125	0.0154006	0.0128837	0.0130285	0.0118334	0.0116342	0.0103486	0.0100951	0.00881847	0.0111544	0.0135084	0.0159348	0.0181258	0.0205704	0.0399909	0.0359891	0.0400091	0.0296605	0.0158171	0.0241829	0.0213943	0.023033
13N_3EC	0.0387144	0.0505659	0.0438207	0.0434586	0.03799	0.0249344	0.0149389	0.019837	0.0192395	0.0332458	0.0466093	0.0493436	0.0333726	0.0223178	0.0101313	0.00769579	0.00730647	0.00745134	0.0084201	0.00781349	0.00639203	0.0120326	0.0146039	0.0417474	0.0426709	0.042517	0.0347035	0.0238298	0.0162245	0.016306	0.0186238	0.0198189	0.0233861	0.028746	0.028067	0.0275238	0.0255772	0.0249525	0.0221458	0.0213852	0.0262653	0.0447895	0.0482843	0.0471073	0.0478859	0.0348483	0.0219556	0.0229425	0.0246718
14N_3EC	0.0485378	0.0464735	0.054966	0.0422091	0.0475781	0.0456677	0.0351019	0.0259937	0.0179538	0.0150566	0.0134269	0.0216931	0.0155093	0.0215754	0.0599728	0.0525849	0.0496062	0.0571571	0.0568311	0.0416388	0.03177	0.0356179	0.030077	0.0338343	0.0321141	0.0181349	0.0306926	0.0400543	0.0458397	0.0609235	0.0485921	0.0327207	0.0210321	0.00966953	0.0156722	0.0194024	0.0287098	0.0480851	0.0429153	0.0384427	0.027234	0.0235763	0.0218108	0.0228882	0.0205613	0.0158624	0.00921684	0.0105115	0.00779538
15N_4AC	0.0191399	0.0243459	0.0209507	0.0180172	0.0154368	0.0246627	0.0200453	0.01378	0.0146492	0.0303757	0.0818198	0.0860389	0.0872793	0.0752648	0.0342146	0.0207696	0.0345224	0.049579	0.0584065	0.0900407	0.0836668	0.0651607	0.0638479	0.0424717	0.0349208	0.0409869	0.039158	0.0386238	0.0381349	0.0402445	0.0249706	0.0231689	0.0226709	0.0137528	0.011254	0.0224989	0.0443187	0.0460661	0.0402263	0.0369217	0.0302943	0.0134178	0.012096	0.0164599	0.0172838	0.0220914	0.0746944	0.0817021	0.0818379
17N_1AP	0.00695337	0.00577637	0.00586691	0.00604799	0.00630149	0.00663649	0.00692621	0.00885469	0.0115075	0.0193119	0.0184065	0.0189498	0.0117248	0.0123857	0.0108556	0.0118153	0.0116523	0.0113173	0.00895428	0.00937076	0.00872793	0.00867361	0.00891806	0.00799457	0.00733364	0.00907198	0.00825713	0.00849253	0.00751471	0.00952467	0.00835672	0.00754187	0.00826618	0.00899049	0.0073789	0.00778633	0.00766863	0.00739701	0.00660933	0.00884563	0.00968764	0.00982345	0.0098325	0.0118425	0.0143594	0.0149751	0.0143594	0.0115618	0.0104482
18N_1EP	0.0109371	0.0109099	0.0137709	0.014459	0.0128656	0.0128384	0.011091	0.0152286	0.0277048	0.035627	0.0526211	0.0729833	0.0644998	0.0672974	0.0756632	0.0654142	0.060163	0.0591127	0.101141	0.0724672	0.069407	0.0666818	0.0651969	0.0543323	0.048746	0.0338162	0.0209688	0.0150475	0.0157085	0.0156089	0.0177456	0.03378	0.0473608	0.0484654	0.0425713	0.0359801	0.0259484	0.0151652	0.00834767	0.0113354	0.011761	0.0114441	0.0117791	0.0133907	0.0119964	0.0185242	0.0175826	0.0166139	0.0138343
19N_2AP	0.0391942	0.039502	0.0369579	0.0321412	0.0296967	0.030756	0.0263468	0.0191852	0.0259303	0.034115	0.0448529	0.0418108	0.0251335	0.0148574	0.00928022	0.0306655	0.0355727	0.0402716	0.0475057	0.0596016	0.0755183	0.173047	0.209244	0.229498	0.22134	0.212105	0.2245	0.138615	0.0440923	0.0268085	0.0271797	0.0307198	0.0354912	0.048239	0.046899	0.0397374	0.0185785	0.0171933	0.0135355	0.0138886	0.0229335	0.0278225	0.0271526	0.0310729	0.034287	0.0165957	0.0254685	0.0204165	0.02622
20N_2EP	0.0338796	0.0469443	0.050584	0.046899	0.0545496	0.0419919	0.0486917	0.0663196	0.0878769	0.0648981	0.0503938	0.0253056	0.0125577	0.0322861	0.0589588	0.0679312	0.0910638	0.0871797	0.0593572	0.0359801	0.0121231	0.00715256	0.00389316	0.0047895	0.00765052	0.011091	0.0123947	0.0130828	0.0113898	0.00631055	0.00595745	0.0047895	0.00325034	0.00321412	0.00364871	0.00326845	0.00612042	0.00918968	0.0114984	0.0140607	0.0148212	0.0137076	0.0131372	0.0111363	0.00976007	0.00994115	0.012277	0.0139339	0.0249253
21N_3AP	0.0261476	0.0264464	0.0281485	0.0167225	0.0148936	0.0149027	0.0119511	0.0115346	0.0118787	0.010593	0.00870982	0.0116523	0.0120869	0.0167044	0.0210865	0.0259937	0.0256134	0.0246084	0.0253146	0.0284382	0.0222544	0.0227795	0.0183794	0.0118425	0.00952467	0.00937981	0.00766863	0.00579448	0.00553191	0.00777727	0.00876415	0.00803984	0.00908103	0.00868266	0.00626528	0.00548665	0.00571299	0.009579	0.0136442	0.0140878	0.0142146	0.016134	0.0134269	0.010584	0.0147306	0.0161702	0.0151109	0.0190131	0.0196378
22N_3EP	0.0143504	0.0143685	0.016306	0.0145677	0.0244636	0.0184156	0.0181258	0.0175826	0.0148846	0.0132368	0.0286283	0.0316433	0.0334812	0.0298778	0.0242282	0.0213581	0.0186781	0.0278135	0.0409507	0.0364418	0.0271707	0.0181711	0.00899049	0.00509733	0.00441829	0.00555908	0.00666365	0.00739701	0.00746039	0.0275328	0.0324129	0.0386238	0.0387053	0.0338615	0.0139249	0.00989588	0.0099502	0.0130919	0.0120688	0.011761	0.0117972	0.00928022	0.00646446	0.00697148	0.00963332	0.00849253	0.00772295	0.00813038	0.00807605
23N_4AP	0.0101313	0.00973291	0.0115799	0.0117429	0.00978723	0.0110729	0.012766	0.0157085	0.0182073	0.0177365	0.0165143	0.0109552	0.00851064	0.00804889	0.0138524	0.0194206	0.0302128	0.0354006	0.0624898	0.0662381	0.0838117	0.0691172	0.0630512	0.056297	0.0104391	0.00997737	0.00916252	0.0085378	0.00855591	0.00733364	0.00668176	0.00735174	0.00882752	0.00765052	0.00860118	0.00922589	0.00821186	0.00899049	0.00977818	0.0135084	0.0177818	0.0205976	0.0210684	0.0272159	0.0243821	0.0147035	0.0103576	0.00758714	0.00662743
24N_4EP	0.00998642	0.00664554	0.00687189	0.00623812	0.00716161	0.00621096	0.00623812	0.00525124	0.00554097	0.00359439	0.00394749	0.00402897	0.00394749	0.00397465	0.00346763	0.00334993	0.00294251	0.00248981	0.00306926	0.00322318	0.00320507	0.00334088	0.00291535	0.00274332	0.00320507	0.00340426	0.00344047	0.00341331	0.00321412	0.00255319	0.00253508	0.00291535	0.00296062	0.00310548	0.00294251	0.00373019	0.0044545	0.00558624	0.00589407	0.00637392	0.00511544	0.0044364	0.00357628	0.00318696	0.00301494	0.00349479	0.00382979	0.00409235	0.00481666
25N_1AC	0.0148755	0.0123404	0.0112449	0.0109009	0.00937076	0.00919873	0.0077139	0.00774106	0.00609325	0.00685378	0.00742417	0.00888185	0.0108375	0.0138705	0.0153644	0.015129	0.0154459	0.0144681	0.0141693	0.0130014	0.0192576	0.0218017	0.0254957	0.0288366	0.0309009	0.0221729	0.0185061	0.0133092	0.00999547	0.0107922	0.00798551	0.00768674	0.00750566	0.0066727	0.00591218	0.00553191	0.00574015	0.00727026	0.00987777	0.0105568	0.0106926	0.010412	0.0106021	0.0136804	0.0127116	0.0139339	0.0161068	0.0138162	0.00880036
27N_2AC	0.022689	0.0213219	0.0199638	0.0302309	0.0232503	0.0259484	0.0252331	0.0226075	0.0105478	0.0115527	0.0127569	0.0110367	0.0105025	0.0118062	0.00828429	0.00755998	0.00627433	0.00567678	0.00555908	0.00575826	0.00623812	0.00669081	0.00686283	0.00831145	0.00873699	0.0101313	0.0109642	0.0104301	0.0103848	0.0123314	0.0107107	0.0116342	0.0138977	0.0117429	0.0124672	0.012947	0.0147669	0.0130738	0.012268	0.0106926	0.0103124	0.00934359	0.00927116	0.0119511	0.0108737	0.013101	0.0123495	0.0113445	0.00800362
29N_3AC	0.00955183	0.0154187	0.0150475	0.0161883	0.0208782	0.0147578	0.0158352	0.0166048	0.0122589	0.0102037	0.00820281	0.00711634	0.00688094	0.00645541	0.004201	0.00456315	0.0050249	0.00575826	0.00730647	0.00695337	0.00742417	0.00884563	0.00746039	0.00791308	0.0121593	0.0110367	0.0111815	0.0108828	0.0072431	0.00664554	0.00976913	0.0114713	0.0134088	0.0137981	0.0111815	0.00878225	0.00603893	0.00391127	0.00462653	0.00416478	0.00458126	0.00593029	0.00507017	0.00520598	0.00529651	0.00631055	0.00868266	0.00875509	0.00874604
30N_3EC	0.00940697	0.0102309	0.010086	0.0106745	0.0153554	0.0145858	0.014287	0.0146582	0.014287	0.0140154	0.0171752	0.0174468	0.0179448	0.0174378	0.0169488	0.0156089	0.0134541	0.0119783	0.00914441	0.0056134	0.00542327	0.0063196	0.00721593	0.0116523	0.0130919	0.0133092	0.0114894	0.0144228	0.0111906	0.00991399	0.0111272	0.011254	0.00898144	0.00805794	0.00618379	0.00728837	0.00633771	0.00624717	0.00755998	0.00732458	0.00745134	0.00828429	0.00826618	0.00995926	0.0110819	0.0115075	0.0113626	0.0108646	0.0116161
32N_4EC	0.00703486	0.00742417	0.00815754	0.0100317	0.0133182	0.0127388	0.0121322	0.0147578	0.00844726	0.00776822	0.0107469	0.00956089	0.00710729	0.00761431	0.00637392	0.00875509	0.00899049	0.00886374	0.00976913	0.00854685	0.00933454	0.00960616	0.00765052	0.00832051	0.00829335	0.00587596	0.00646446	0.00765052	0.00857402	0.00837483	0.00886374	0.00669986	0.00586691	0.00555908	0.00579448	0.00585785	0.00535084	0.00481666	0.00567678	0.00556813	0.0050249	0.00664554	0.00661838	0.0052603	0.00689905	0.00701675	0.00792214	0.00903576	0.00975102
33N_1AP	0.0480851	0.0669805	0.0558895	0.0527207	0.0283386	0.0208239	0.0152196	0.0128384	0.0172838	0.0166953	0.0146311	0.01799	0.0148846	0.0187506	0.0202173	0.025206	0.0230602	0.0228429	0.0213581	0.0204074	0.013952	0.012947	0.0142055	0.0127569	0.0156904	0.0174106	0.0190765	0.0169126	0.0251426	0.0312177	0.0344138	0.034622	0.0383794	0.023531	0.0208782	0.0173382	0.018153	0.0198551	0.0199004	0.0205161	0.0131643	0.0155908	0.0147669	0.0159891	0.0162064	0.0109461	0.00891806	0.0109461	0.010249
34N_1EP	0.00889995	0.0115799	0.012612	0.012268	0.0143323	0.0157175	0.0154097	0.0223993	0.0349389	0.0350204	0.043694	0.032938	0.0286012	0.0174559	0.0154731	0.0118515	0.0116252	0.0165324	0.01579	0.0222725	0.0441014	0.0726392	0.0760254	0.090919	0.0915346	0.0993753	0.1221	0.130656	0.103096	0.0830421	0.0857764	0.11139	0.111689	0.0854052	0.0557537	0.0262019	0.0278135	0.0390131	0.0537528	0.063033	0.0663196	0.0809054	0.0847442	0.0695518	0.0643187	0.0386419	0.0288366	0.0263649	0.0367316
35N_2AP	0.191453	0.134984	0.0930466	0.0937981	0.0577456	0.0380172	0.0354006	0.0364509	0.0696695	0.0975283	0.0925668	0.082689	0.0737619	0.0592214	0.0814033	0.143839	0.157112	0.146428	0.135165	0.0469986	0.017809	0.0437121	0.0580896	0.0664282	0.146627	0.206166	0.224219	0.17502	0.164645	0.112232	0.0822635	0.108121	0.167823	0.209072	0.310656	0.204962	0.135238	0.151788	0.117619	0.0825894	0.134631	0.226492	0.263685	0.268628	0.167053	0.0965776	0.13962	0.163549	0.161584
36N_2AP	0.015971	0.0182707	0.0143866	0.00891806	0.00751471	0.00794024	0.00772295	0.0143323	0.0182707	0.0205251	0.0212042	0.022354	0.0154278	0.0134812	0.0105206	0.00839294	0.00757809	0.00789498	0.00925306	0.00958805	0.0176188	0.0178271	0.0178723	0.0163603	0.0123585	0.0099321	0.0113083	0.0127931	0.0119421	0.0137528	0.0129742	0.00797646	0.00707107	0.00801268	0.0133182	0.011091	0.0112721	0.0110457	0.00594839	0.00440018	0.00499774	0.00512449	0.00509733	0.00522408	0.00430964	0.00483477	0.00566772	0.00953373	0.0106926
37N_3AP	0.0151381	0.0136623	0.0130104	0.0134541	0.01244	0.0109099	0.0102943	0.00861023	0.00612042	0.00618379	0.00642825	0.00624717	0.00767768	0.00744228	0.0100407	0.0115708	0.0126664	0.0111363	0.0104301	0.00911725	0.0100226	0.00740607	0.00765052	0.018488	0.0361883	0.0331643	0.0329018	0.0338886	0.00746039	0.00917157	0.010412	0.0113354	0.01177	0.0119873	0.0130919	0.0125849	0.0105659	0.00835672	0.00650068	0.005378	0.00687189	0.00896333	0.0101947	0.0111906	0.0108828	0.00885469	0.00801268	0.00617474	0.00734269
39N_4AP	0.0176188	0.0185152	0.0327569	0.0354097	0.0290448	0.0169036	0.0180081	0.020172	0.0198914	0.0217293	0.0144771	0.0128384	0.0157809	0.0158352	0.0101132	0.0112359	0.0104753	0.0107379	0.0120869	0.0150475	0.0142598	0.0110005	0.0110276	0.0151562	0.0152014	0.0158081	0.015464	0.0145315	0.0111182	0.012268	0.0209144	0.021847	0.0232051	0.0239837	0.0203078	0.0133273	0.0142146	0.0140426	0.0146311	0.0150475	0.0131824	0.0110095	0.0117067	0.0130647	0.0154278	0.020172	0.0206881	0.0197012	0.0159529
41N_1AC	0.0148755	0.0232956	0.0241105	0.0301313	0.022191	0.0223178	0.0133454	0.0137347	0.0131734	0.014115	0.0150928	0.0186872	0.0700317	0.0773744	0.0762698	0.066211	0.0357447	0.0126664	0.0168764	0.0183975	0.0258941	0.0358533	0.0346673	0.0467361	0.0333816	0.0294613	0.0222816	0.0254504	0.0253689	0.029742	0.0274966	0.0397465	0.0406247	0.0362155	0.0336985	0.0268357	0.0198642	0.0188773	0.0234495	0.0301041	0.0316071	0.0314079	0.0320145	0.0156089	0.0129108	0.0152558	0.0154912	0.0165867	0.0190312
42N_1EC	0.0249525	0.036813	0.0379086	0.0299955	0.0267632	0.0210684	0.0221367	0.0203078	0.0306745	0.0325668	0.0316614	0.027388	0.0287551	0.0201901	0.0225351	0.0227343	0.0394477	0.0413128	0.0336532	0.0322046	0.027234	0.023694	0.0306021	0.041675	0.0590675	0.061349	0.0546763	0.041349	0.0427071	0.0502218	0.0441829	0.0735808	0.0995383	0.100045	0.105858	0.0996378	0.0798099	0.0863015	0.0963151	0.0583341	0.0417655	0.0430693	0.0283477	0.0418651	0.0466636	0.0532368	0.0580715	0.0463558	0.0344409
43N_2AC	0.0118062	0.0179538	0.0210412	0.0224355	0.0201811	0.0395111	0.0271978	0.0253327	0.0314079	0.0300045	0.0200815	0.0176822	0.0133545	0.00878225	0.00566772	0.00574015	0.00709823	0.00932549	0.00999547	0.0127026	0.0138796	0.0128112	0.0122046	0.0115799	0.00989588	0.011933	0.0134722	0.0135265	0.0169941	0.0162155	0.0172295	0.0179719	0.0269986	0.0197374	0.0187144	0.0208511	0.0198008	0.0264645	0.0360435	0.0536713	0.0615392	0.0967225	0.102291	0.103214	0.0904663	0.0503938	0.0321775	0.0243821	0.0230512
44N_2EC	0.0140335	0.00734269	0.00516071	0.00405613	0.00385695	0.00359439	0.0039656	0.00453599	0.00544138	0.00610231	0.00542327	0.00637392	0.00660933	0.0136895	0.0128203	0.0125577	0.0117519	0.0119239	0.00770484	0.00819375	0.00794024	0.00798551	0.00673608	0.00613852	0.00940697	0.0104572	0.0129561	0.011435	0.0112992	0.00974196	0.00699864	0.00719783	0.0100498	0.0141784	0.0133907	0.0148665	0.0142689	0.01579	0.0176822	0.0211498	0.0351924	0.0495337	0.0420643	0.0411498	0.0407424	0.0267089	0.0110367	0.00508828	0.00278859
45N_3AC	0.00722499	0.00688094	0.00857402	0.00881847	0.0115437	0.0132096	0.0117972	0.0117338	0.0110367	0.0120688	0.0126845	0.0136351	0.014124	0.0112177	0.00777727	0.00795835	0.0097148	0.00923495	0.010258	0.0115165	0.0109552	0.0101494	0.0145405	0.0145043	0.0138162	0.0148936	0.0140969	0.00859212	0.0106655	0.00961521	0.0105478	0.0103395	0.00887279	0.00691716	0.00652784	0.00444545	0.00482571	0.00497057	0.0039656	0.00453599	0.00518787	0.00484382	0.00545043	0.00606609	0.00504301	0.00511544	0.00657311	0.00687189	0.00925306
46N_3EC	0.0861657	0.161086	0.132902	0.0662381	0.0410231	0.032603	0.03311	0.0328203	0.0320054	0.0449615	0.058325	0.0814396	0.0780987	0.0723133	0.0310367	0.0244726	0.0180081	0.0123133	0.0139339	0.0107651	0.0093617	0.00902671	0.00854685	0.00536895	0.00657311	0.00862834	0.0118968	0.0161521	0.0209959	0.0254052	0.028402	0.0238207	0.02067	0.0183431	0.0169307	0.0140697	0.0120779	0.0174196	0.0213128	0.0177999	0.0204889	0.039158	0.0552739	0.056306	0.0561974	0.0290629	0.0179719	0.0199366	0.0370303
49N_1AP	0.0172024	0.00888185	0.010412	0.00816659	0.00622906	0.00644636	0.00624717	0.00542327	0.00703486	0.0145677	0.0141603	0.0135899	0.0133635	0.0179538	0.0119964	0.0125487	0.0124672	0.0130104	0.0105025	0.00940697	0.00990493	0.00819375	0.00560435	0.00395654	0.00862834	0.0121141	0.0227071	0.027895	0.0338253	0.0249344	0.0181802	0.010919	0.0107288	0.00997737	0.0143323	0.0160978	0.013273	0.0134993	0.0104663	0.00710729	0.00486193	0.00454504	0.00462653	0.00786781	0.0128112	0.0125396	0.0117338	0.011933	0.00522408
50N_1EP	0.00870077	0.0130738	0.0254323	0.0294613	0.0301584	0.0258126	0.0184789	0.0136351	0.0109099	0.0289	0.0295337	0.0287913	0.0292893	0.0326392	0.0149027	0.0201449	0.0173291	0.0162336	0.00845632	0.00840199	0.00709823	0.00698053	0.00574921	0.00585785	0.00542327	0.00775011	0.00802173	0.0169217	0.0177999	0.0193753	0.0497872	0.099656	0.112404	0.129425	0.151191	0.124183	0.0923766	0.0851335	0.0416569	0.0230874	0.0213128	0.0265369	0.0373382	0.03244	0.0436668	0.101802	0.0476053	0.0458216	0.0469805
51N_2AP	0.125622	0.102798	0.0825351	0.090756	0.160118	0.163594	0.145188	0.063196	0.0501222	0.0217112	0.0272159	0.0286012	0.0173563	0.0175917	0.0189407	0.0179719	0.0175283	0.0215482	0.0218198	0.0526211	0.0705749	0.0702037	0.0726573	0.0523042	0.0407062	0.0486917	0.0848257	0.113264	0.0976913	0.0867089	0.0643368	0.0530738	0.0712811	0.0651517	0.0765686	0.10211	0.0832684	0.0725939	0.0889814	0.0911544	0.0861838	0.115781	0.140543	0.105885	0.101077	0.107252	0.155935	0.174459	0.170484
52N_2EP	0.0241557	0.0299593	0.0300317	0.0243278	0.0167768	0.0161883	0.0168764	0.0182888	0.0194024	0.0190493	0.0195745	0.0165867	0.0144952	0.015301	0.0185514	0.0160072	0.0202354	0.0199819	0.025206	0.0273246	0.0235491	0.0166953	0.01933	0.0112268	0.0124038	0.0111815	0.0132277	0.0175373	0.0205342	0.016976	0.01579	0.0132096	0.0104391	0.00857402	0.00779538	0.00723404	0.00697148	0.00776822	0.00947035	0.00856496	0.0110276	0.0122227	0.0107651	0.0111906	0.0105568	0.00742417	0.00894522	0.0101947	0.0121231
53N_3AP	0.044373	0.0465459	0.0465912	0.0312177	0.0286917	0.0429063	0.0538253	0.056306	0.0453689	0.0437392	0.0497329	0.0492983	0.034794	0.0341512	0.0274242	0.0200724	0.0155455	0.013445	0.0106111	0.0152196	0.0155002	0.0161159	0.0143504	0.0158443	0.0183069	0.0265369	0.029244	0.0324129	0.0558352	0.0441829	0.0328927	0.0254052	0.0183703	0.0143866	0.0387868	0.0462743	0.0753825	0.102689	0.10517	0.121992	0.0965233	0.0342508	0.020163	0.0222635	0.0244726	0.0211227	0.0196922	0.0187687	0.0156904
54N_3EP	0.00831145	0.0104844	0.0147488	0.0267904	0.0348031	0.0273517	0.0239746	0.0209959	0.0147669	0.01177	0.0131643	0.0135718	0.0154459	0.0186238	0.0174649	0.0207877	0.0216025	0.0187777	0.013789	0.0147397	0.0148121	0.0135355	0.0123314	0.0108375	0.00965143	0.00976913	0.00776822	0.00874604	0.0186691	0.022526	0.0221458	0.0229425	0.0143142	0.00994115	0.0129289	0.0173382	0.0186691	0.0159258	0.0138886	0.0119421	0.00996831	0.0098325	0.0098144	0.00825713	0.0155455	0.0174921	0.0207515	0.0183703	0.0154821
55N_4AP	0.00524219	0.0039656	0.00380263	0.00441829	0.0050249	0.00460842	0.00536895	0.00600272	0.00545948	0.0045722	0.00530557	0.0044364	0.00459937	0.00556813	0.00742417	0.00746039	0.00962426	0.00899049	0.00762336	0.00696243	0.00691716	0.00578542	0.00556813	0.00589407	0.00547759	0.00508828	0.00487098	0.00436397	0.00417383	0.00418289	0.0040833	0.0045541	0.0059665	0.00624717	0.00640109	0.0084201	0.00779538	0.00626528	0.00583069	0.00648257	0.00479855	0.00496152	0.00607515	0.00676324	0.00805794	0.00716161	0.00698959	0.00673608	0.00646446
56N_4EP	0.0247171	0.0160887	0.0143685	0.0140335	0.012938	0.0121684	0.0116704	0.0328565	0.0363875	0.0441105	0.0493708	0.0325396	0.0271163	0.0244273	0.0136804	0.0326483	0.0324491	0.0293345	0.0324491	0.0211317	0.0133997	0.0171661	0.015971	0.014124	0.0116071	0.00481666	0.00515165	0.00851969	0.00964237	0.0356632	0.061684	0.0707107	0.0683386	0.0584971	0.0146944	0.00849253	0.0120779	0.0200815	0.0271978	0.0340335	0.042182	0.034459	0.0287098	0.0299411	0.0245088	0.0333273	0.046383	0.0319873	0.028239
58N_1EC	0.0190765	0.0167225	0.0136713	0.0146763	0.0160344	0.0144681	0.0108556	0.0121141	0.0169217	0.0161702	0.0154821	0.0175555	0.0211227	0.0174378	0.0174378	0.01512	0.0199457	0.0211227	0.0257764	0.029244	0.0256858	0.0164237	0.0143413	0.0185333	0.0162426	0.0157628	0.0152648	0.00842915	0.00937076	0.00689905	0.00814848	0.0145043	0.0291082	0.0429787	0.0440109	0.0417836	0.0211227	0.0222363	0.0249253	0.0354097	0.0346582	0.0335084	0.0242915	0.0170575	0.0159801	0.0166229	0.0169941	0.0143866	0.00990493
60N_2EC	0.0125668	0.0302943	0.0528112	0.0551381	0.0626528	0.0530195	0.0585876	0.0323857	0.0365233	0.0402988	0.0452331	0.0330466	0.0418017	0.0378904	0.027895	0.0198461	0.00933454	0.0210774	0.0274785	0.0335265	0.0321412	0.0294794	0.0139701	0.0139792	0.00892712	0.00948846	0.00899955	0.0110186	0.0140878	0.015129	0.0159891	0.0170303	0.017139	0.0202626	0.0224355	0.0388592	0.0524491	0.0497691	0.0673608	0.0586781	0.0610593	0.0580081	0.0556813	0.0444455	0.0310638	0.0261204	0.0222454	0.0170575	0.0200905
61N_3AC	0.00938886	0.00842915	0.00800362	0.00803078	0.00599366	0.00775917	0.0151833	0.0164871	0.0155274	0.0130738	0.00979629	0.0064373	0.00715256	0.00872793	0.00879131	0.00832051	0.00851064	0.00823902	0.00787687	0.00751471	0.00918062	0.00809416	0.00819375	0.0069081	0.00601177	0.00424627	0.00465369	0.00424627	0.00436397	0.00435491	0.0045541	0.00397465	0.00495247	0.00600272	0.00574015	0.0071254	0.0070258	0.00617474	0.00589407	0.00731553	0.00664554	0.00641919	0.00884563	0.010258	0.00757809	0.00822997	0.00803984	0.00452694	0.00552286
63N_4AC	0.0114169	0.0113536	0.0105568	0.0101494	0.00832051	0.00798551	0.00731553	0.00555908	0.00512449	0.00535989	0.00540516	0.0058488	0.00585785	0.00755093	0.0114894	0.0112359	0.0113173	0.0133816	0.0117338	0.010919	0.0137076	0.0144681	0.0123766	0.0113536	0.0104482	0.00784065	0.0071435	0.00758714	0.00647352	0.00616569	0.00491625	0.00548665	0.00742417	0.00791308	0.00750566	0.00970575	0.0121593	0.0121322	0.0145134	0.0147488	0.0137347	0.0127478	0.0130466	0.0146763	0.0159801	0.0159529	0.0180625	0.0228791	0.0182617
64N_4EC	0.0174106	0.0162698	0.0213128	0.03445	0.0421186	0.0591761	0.0601268	0.0494432	0.0567768	0.041177	0.0541693	0.0544319	0.0504391	0.0317519	0.0343413	0.0614758	0.0565143	0.0653689	0.0650068	0.0575736	0.0316976	0.0430602	0.0662924	0.0606971	0.0789045	0.0533816	0.0384608	0.0287189	0.025043	0.0253146	0.0311725	0.0388592	0.0535627	0.0675781	0.0865459	0.0936804	0.0738253	0.0766591	0.0982888	0.128022	0.12794	0.0998008	0.113626	0.119647	0.0947306	0.0790222	0.0617927	0.0659303	0.0648167
65N_1AP	0.0113083	0.00528746	0.00550475	0.00696243	0.00642825	0.00833861	0.012766	0.012431	0.011263	0.0300045	0.0288547	0.0220824	0.0217655	0.0210955	0.0256043	0.0293889	0.0417474	0.0461838	0.0473336	0.0319421	0.0192485	0.0202445	0.0220552	0.0190675	0.0205342	0.0202535	0.0186148	0.0172838	0.0183975	0.0158714	0.0224174	0.0259846	0.0320054	0.029244	0.0312992	0.0245994	0.025378	0.0177184	0.0179267	0.0152105	0.0132187	0.0121865	0.0175192	0.0133907	0.00828429	0.00823902	0.00876415	0.0180444	0.0136713
66N_1EP	0.0093617	0.00821186	0.00828429	0.00858307	0.00911725	0.00895428	0.00746039	0.00832956	0.00582164	0.00571299	0.00594839	0.00688094	0.0086555	0.0116252	0.0202716	0.035301	0.033282	0.0363241	0.0346763	0.0209507	0.0229516	0.0265278	0.0282481	0.0265459	0.024364	0.0276505	0.0266636	0.0251335	0.0296876	0.0403078	0.0280579	0.0306202	0.0235129	0.0243278	0.0235491	0.0181349	0.0130919	0.0151381	0.0123766	0.0137438	0.0135536	0.0183341	0.0226709	0.0266546	0.0244455	0.0244545	0.0204617	0.0157628	0.0154187
67N_2AP	0.0114441	0.010593	0.0113264	0.012612	0.0174921	0.0126211	0.0138434	0.0117248	0.0122318	0.00944319	0.00982345	0.00869172	0.00913536	0.00780444	0.00729742	0.00705297	0.00963332	0.00919873	0.00975102	0.0125396	0.0118244	0.0105025	0.0103757	0.0103576	0.00892712	0.00852875	0.00860118	0.00762336	0.00609325	0.00681756	0.00839294	0.0075962	0.00799457	0.00852875	0.00641919	0.00666365	0.00694432	0.00586691	0.00543232	0.00541421	0.00720688	0.00893617	0.00895428	0.0115165	0.00949751	0.0154912	0.0151833	0.0174468	0.0168493
68N_2EP	0.0104934	0.0101584	0.0123857	0.0114441	0.0117972	0.0158171	0.0150113	0.0128022	0.0133092	0.00918968	0.00682662	0.0060842	0.00436397	0.00492531	0.00575826	0.00708013	0.00770484	0.00814848	0.00755998	0.00581258	0.00508828	0.0045541	0.00411951	0.00411046	0.00438207	0.00673608	0.00645541	0.00711634	0.0454323	0.0459846	0.0435853	0.0442915	0.0211136	0.00903576	0.0093617	0.0155727	0.0152467	0.0155093	0.0155364	0.0144319	0.0138615	0.0137619	0.0165867	0.00937076	0.00807605	0.00930738	0.00727931	0.00756904	0.00776822
70N_3EP	0.0252422	0.0215029	0.00939792	0.00884563	0.00980534	0.0559077	0.0712902	0.0781077	0.0799004	0.0477863	0.0271526	0.0263015	0.0210955	0.0199366	0.0367134	0.0306021	0.0368945	0.0322227	0.0226347	0.0173201	0.0225713	0.0189135	0.023187	0.0216297	0.0202445	0.0125215	0.011933	0.0112721	0.0103486	0.00779538	0.00729742	0.00907198	0.00836578	0.00843821	0.010421	0.0113083	0.010412	0.0104029	0.0120598	0.0150928	0.0134993	0.0157537	0.0160435	0.0141693	0.0126935	0.0119421	0.00913536	0.00942508	0.00849253
72N_4EP	0.0420371	0.0344771	0.0390675	0.0376913	0.0448438	0.050593	0.0772838	0.0620914	0.0612856	0.0333726	0.0191308	0.0185333	0.01799	0.0118606	0.0101947	0.0115075	0.0142508	0.0144138	0.0155364	0.0144228	0.012268	0.00972386	0.0149389	0.0163875	0.01799	0.0181168	0.0232956	0.0200996	0.0196922	0.0164056	0.0140426	0.00905387	0.0111453	0.00980534	0.00864645	0.00911725	0.00967859	0.0180625	0.0499593	0.0908465	0.135138	0.117583	0.0624174	0.0281666	0.0137166	0.0199728	0.0499593	0.0639022	0.0724129
73N_1AC	0.0564418	0.0546401	0.0537257	0.0411498	0.0196016	0.0348212	0.0597646	0.0970575	0.101856	0.0678407	0.0560344	0.0576007	0.0426528	0.0452784	0.0601539	0.0617293	0.0686736	0.0498234	0.0506474	0.0312087	0.0259846	0.0252784	0.0219556	0.0242734	0.0221367	0.0237483	0.0321231	0.0178633	0.0273517	0.032431	0.0319058	0.0314622	0.0415482	0.0416478	0.0504482	0.0461385	0.0394024	0.0441648	0.0432232	0.031761	0.029244	0.0553101	0.0495518	0.0513354	0.0638388	0.0621096	0.0676596	0.0852784	0.0634676
74N_1EC	0.027569	0.0269805	0.0263739	0.0332277	0.0389226	0.0433861	0.0402807	0.0399457	0.0483748	0.0419556	0.0399457	0.0400634	0.0224808	0.0124853	0.0132005	0.0103848	0.0106745	0.0166772	0.0178452	0.0159348	0.0164056	0.0197012	0.0171299	0.0188683	0.0340969	0.032775	0.0381802	0.0243459	0.0162064	0.0153735	0.0166048	0.0104753	0.0238026	0.0221367	0.0218379	0.0199547	0.0141512	0.0045722	0.0042191	0.00428248	0.00464464	0.00440018	0.00545948	0.00544138	0.00671797	0.012775	0.0222273	0.0250611	0.0280851
75N_2AC	0.0350928	0.0224898	0.0150113	0.0121231	0.0180896	0.0202807	0.0204074	0.0167406	0.0107017	0.00727026	0.0098144	0.013101	0.0119783	0.010919	0.0201358	0.0199185	0.0172929	0.018153	0.0177094	0.00593934	0.00629244	0.00755998	0.0110819	0.0103757	0.0107922	0.0111182	0.0137528	0.0182888	0.023196	0.0251698	0.0275057	0.0330557	0.0278135	0.0297329	0.0367949	0.0315075	0.0308103	0.026048	0.0285559	0.0265459	0.023024	0.0272159	0.025713	0.0182707	0.0168855	0.0188321	0.0145043	0.011426	0.0120688
76N_3EC	0.00232684	0.00254414	0.00352196	0.00395654	0.00421005	0.00442734	0.00384789	0.00295156	0.00283386	0.00260751	0.00287913	0.00329561	0.00385695	0.0041014	0.00476234	0.00481666	0.00530557	0.00622001	0.00609325	0.00641014	0.00676324	0.00529651	0.00453599	0.0035129	0.00289724	0.00585785	0.00867361	0.00909914	0.00947035	0.00966953	0.00485287	0.00388411	0.00536895	0.00517881	0.00523314	0.00540516	0.00565867	0.00402897	0.00468085	0.0118606	0.0126935	0.0122318	0.0119511	0.0103486	0.00411951	0.00299683	0.00284292	0.00368493	0.00582164
77N_3AC	0.00569488	0.00580353	0.00583975	0.00715256	0.0066727	0.00598461	0.00711634	0.00947035	0.00906292	0.0106383	0.0145405	0.0121956	0.0113354	0.00923495	0.0044545	0.00448167	0.00416478	0.00476234	0.00572205	0.00717067	0.0074966	0.00776822	0.00704391	0.00658216	0.00583975	0.00541421	0.00526935	0.00491625	0.00441829	0.00688094	0.00657311	0.00636487	0.00836578	0.0117791	0.00754187	0.00741512	0.00944319	0.00779538	0.00914441	0.0108013	0.0107288	0.00857402	0.0102128	0.0150837	0.0151743	0.0171118	0.0207334	0.0126392	0.0185695
79N_4AC	0.00459937	0.00454504	0.0058488	0.00716161	0.00909914	0.00904482	0.00951562	0.0101947	0.00881847	0.0138615	0.0149027	0.01244	0.0163241	0.0167949	0.0117519	0.0128203	0.0120054	0.00921684	0.00860118	0.00766863	0.00762336	0.00727931	0.00630149	0.00460842	0.00426437	0.00479855	0.00790403	0.0105115	0.012766	0.0157537	0.016134	0.0150928	0.01445	0.0294703	0.0270892	0.0203259	0.0181621	0.015292	0.0112721	0.00915346	0.0158081	0.0242825	0.0168764	0.0170484	0.0176188	0.00979629	0.0094794	0.00848348	0.00765052
80N_4EC	0.0123766	0.0108284	0.010593	0.0093617	0.00798551	0.0051426	0.0042191	0.00515165	0.00685378	0.0074966	0.00883658	0.00966953	0.00942508	0.0115618	0.0105568	0.00927116	0.00824808	0.0102943	0.0127478	0.0141603	0.0159801	0.0124853	0.0127388	0.00945224	0.00587596	0.00541421	0.00680851	0.00847442	0.0103938	0.0113988	0.0105115	0.00979629	0.00881847	0.00689905	0.00665459	0.00811227	0.00698959	0.0070258	0.00856496	0.014278	0.0103667	0.0109552	0.0129199	0.0144319	0.013943	0.0161068	0.0165686	0.0131734	0.011254
83N_2EC	0.0197012	0.0314713	0.0317519	0.032612	0.0404346	0.0397827	0.0241014	0.029244	0.0297329	0.024373	0.0254685	0.0380534	0.0359529	0.0482028	0.0499321	0.0595111	0.0538343	0.0346763	0.0254142	0.0172476	0.0345677	0.041349	0.0452965	0.0440742	0.0296062	0.0147669	0.00640109	0.00602988	0.0415754	0.0914894	0.0928656	0.0936895	0.0593572	0.00745134	0.00548665	0.00437302	0.00661838	0.0130466	0.0324219	0.0326935	0.0364599	0.0374015	0.039158	0.0476143	0.0476505	0.0268176	0.0257945	0.0241467	0.025034
84N_4EP	0.0070258	0.00669081	0.0188683	0.0160435	0.0174015	0.0207424	0.0133364	0.0107922	0.0121141	0.0131191	0.0113264	0.0130014	0.0118425	0.0103033	0.00908103	0.0110819	0.0120054	0.0222363	0.0298416	0.0511996	0.048737	0.0299049	0.0243368	0.0158533	0.011933	0.0094794	0.00956089	0.00938886	0.0133997	0.0129742	0.0136442	0.018986	0.0140697	0.0107651	0.0110819	0.00788592	0.00603893	0.00987777	0.0116885	0.0136985	0.0138343	0.0101947	0.0070258	0.00579448	0.00898144	0.0101766	0.0177999	0.0232594	0.022345
[truncated: 8 more columns]

## Sheet: determinism
Subjects	W1	W2	W3	W4	W5	W6	W7	W8	W9	W10	W11	W12	W13	W14	W15	W16	W17	W18	W19	W20	W21	W22	W23	W24	W25	W26	W27	W28	W29	W30	W31	W32	W33	W34	W35	W36	W37	W38	W39	W40	W41	W42	W43	W44	W45	W46	W47	W48	W49
01N_1AP	0.436868	0.39241	0.402123	0.430466	0.362599	0.403668	0.334406	0.358167	0.361631	0.382588	0.35041	0.382788	0.395282	0.408569	0.530242	0.56266	0.483309	0.550929	0.629858	0.549876	0.515033	0.503421	0.504253	0.435415	0.414847	0.358352	0.331378	0.30828	0.512298	0.424026	0.42723	0.412236	0.423581	0.351163	0.561219	0.67016	0.62829	0.567333	0.578619	0.506052	0.4379	0.51323	0.526435	0.40079	0.428997	0.491143	0.381871	0.391304	0.375355
02N_1EP	0.490256	0.454488	0.532946	0.571831	0.433515	0.334842	0.3352	0.386396	0.361282	0.56012	0.739907	0.633246	0.607313	0.555635	0.427594	0.402626	0.349276	0.352562	0.33772	0.304855	0.238349	0.266178	0.36944	0.374258	0.469136	0.553621	0.509348	0.499245	0.587757	0.574941	0.521579	0.490147	0.467403	0.533228	0.583992	0.631729	0.60257	0.774856	0.699061	0.669333	0.73798	0.712061	0.573515	0.516167	0.479821	0.558302	0.54323	0.384567	0.345011
03N_2AP	0.305674	0.291818	0.104257	0.176796	0.181991	0.202652	0.293173	0.32503	0.370732	0.462718	0.563112	0.583029	0.56696	0.5381	0.626586	0.706781	0.734867	0.50317	0.470831	0.373409	0.359574	0.396094	0.369335	0.328428	0.485413	0.515649	0.570926	0.630656	0.675309	0.680041	0.597412	0.466718	0.475083	0.356042	0.239476	0.196645	0.0967742	0.060793	0.027027	0.0397196	0.0613718	0.213028	0.362952	0.481777	0.508212	0.454308	0.330623	0.315491	0.280759
04N_2EP	0.212015	0.244419	0.236283	0.247589	0.223249	0.409122	0.154884	0.177179	0.145436	0.16736	0.218994	0.258136	0.255254	0.213571	0.175814	0.196802	0.208674	0.210896	0.113265	0.113174	0.113378	0.108175	0.204765	0.224236	0.27864	0.217599	0.234373	0.220186	0.181894	0.246126	0.12134	0.111111	0.247985	0.322219	0.331305	0.352234	0.346201	0.358692	0.288157	0.3193	0.218564	0.214619	0.270692	0.307784	0.357996	0.511108	0.509625	0.554273	0.607377
05N_3AP	0.58411	0.641547	0.565057	0.555467	0.649851	0.770377	0.733501	0.682468	0.698831	0.633228	0.554761	0.674097	0.669025	0.53126	0.536729	0.453567	0.374812	0.411671	0.499373	0.402018	0.545541	0.644085	0.556443	0.616545	0.49089	0.337644	0.154315	0.180095	0.182692	0.373266	0.353865	0.33003	0.288062	0.308905	0.0947075	0.527631	0.777902	0.817425	0.851938	0.852941	0.275758	0.207207	0.535604	0.550955	0.339423	0.313778	0.235789	0.180638	0.247173
06N_3EP	0.0980986	0.0638298	0.0579034	0.0782276	0.106775	0.205204	0.180124	0.272783	0.305781	0.297211	0.211549	0.135874	0.137244	0.131487	0.0989902	0.172192	0.153672	0.169499	0.341122	0.289695	0.333067	0.367357	0.289474	0.268886	0.197549	0.167069	0.140873	0.150928	0.221108	0.226352	0.280404	0.433547	0.396802	0.590719	0.697801	0.638867	0.677593	0.723861	0.736176	0.618135	0.491188	0.405901	0.318433	0.32479	0.357133	0.273095	0.254347	0.19155	0.147077
07N_4AP	0.264605	0.115551	0.180354	0.18123	0.155945	0.120339	0.078727	0.235385	0.252475	0.303485	0.292506	0.333333	0.322909	0.411514	0.460471	0.440779	0.43848	0.401831	0.351292	0.390381	0.319608	0.369057	0.401384	0.531068	0.546807	0.486111	0.532273	0.482515	0.515049	0.46542	0.48695	0.411959	0.429242	0.386005	0.358827	0.337759	0.372382	0.305136	0.467854	0.374189	0.166131	0.13549	0.0833841	0.299604	0.356746	0.332413	0.425461	0.25614	0.313869
08N_4EP	0.0863095	0	0	0	0	0	0	0.0788177	0.0709534	0.0709534	0.0704846	0	0.0888158	0.11041	0.0888325	0.12037	0.189533	0.28133	0.252294	0.326648	0.412137	0.335413	0.285714	0.23389	0.145695	0	0	0	0	0.158879	0.154545	0.132039	0.215434	0.182156	0.273846	0.292282	0.270517	0.191829	0	0.132184	0.20362	0.230769	0.265487	0.302905	0.237006	0.265271	0.246753	0.244373	0.157635
09N_1EC	0.420897	0.242593	0.318339	0.243123	0.261209	0.356427	0.393715	0.393004	0.385309	0.382301	0.35	0.570584	0.550196	0.540925	0.352604	0.364017	0.169774	0.163025	0.171601	0.243302	0.233038	0.240724	0.262626	0.34003	0.479881	0.414966	0.514815	0.625139	0.434221	0.389517	0.427644	0.362301	0.41794	0.355881	0.37006	0.305902	0.20072	0.207734	0.165096	0.154884	0.129664	0.122723	0.131181	0.147789	0.157225	0.267949	0.29036	0.382536	0.480287
10N_1AC	0.477671	0.268041	0.238333	0.107438	0.104945	0.124649	0.122575	0.127993	0.207899	0.247393	0.250587	0.178995	0.229469	0.14433	0.100159	0.205638	0.209106	0.216783	0.349119	0.372184	0.357815	0.224504	0.228814	0.191401	0.0573643	0.0726916	0.0589172	0.0495208	0.0440967	0.206759	0.339332	0.350041	0.373699	0.389732	0.174286	0.160668	0.162486	0.136697	0.155957	0.261051	0.308316	0.353118	0.398981	0.397849	0.31139	0.253133	0.25346	0.263064	0.280299
11N_2AC	0.533784	0.28855	0.294393	0.45	0.458748	0.307765	0.284933	0.271646	0.204252	0.249558	0.391482	0.388889	0.573298	0.541409	0.417316	0.275296	0.216135	0.131604	0.287164	0.300418	0.376234	0.390998	0.571429	0.618106	0.58391	0.585483	0.452652	0.357554	0.197817	0.243266	0.39701	0.445896	0.492381	0.448238	0.322727	0.255751	0.411234	0.551313	0.552131	0.60498	0.440844	0.289574	0.252139	0.185229	0.193357	0.0628307	0.327586	0.414004	0.355132
13N_3EC	0.433804	0.426355	0.438436	0.442278	0.362787	0.40532	0.378799	0.515337	0.480423	0.477742	0.543253	0.548418	0.564764	0.578475	0.388009	0.143089	0.215035	0.209184	0.348201	0.332803	0.252654	0.47532	0.566763	0.581353	0.57548	0.58664	0.69622	0.556112	0.545922	0.48659	0.545554	0.486182	0.519165	0.422789	0.408377	0.397504	0.403089	0.331614	0.270466	0.268923	0.182671	0.212012	0.286387	0.302335	0.340522	0.401494	0.478082	0.469769	0.511647
14N_3EC	0.562037	0.543895	0.53804	0.63316	0.530279	0.555209	0.532674	0.407436	0.498284	0.37605	0.383814	0.362332	0.52977	0.522346	0.612302	0.642024	0.654081	0.575189	0.402019	0.294225	0.406842	0.376318	0.438614	0.346374	0.346316	0.424774	0.701426	0.682741	0.713339	0.634278	0.569758	0.602545	0.452586	0.453782	0.386364	0.406184	0.547003	0.672971	0.740954	0.740962	0.68013	0.646264	0.559798	0.590493	0.466601	0.500989	0.487867	0.512959	0.399361
15N_4AC	0.324109	0.260391	0.225589	0.202849	0.269388	0.310968	0.32188	0.4662	0.389732	0.403526	0.671779	0.655805	0.675066	0.84464	0.658014	0.462846	0.60313	0.423583	0.480856	0.433986	0.471019	0.49368	0.516503	0.421454	0.457482	0.533318	0.572861	0.566361	0.66256	0.583373	0.404281	0.454819	0.464081	0.306075	0.453373	0.617333	0.677253	0.719143	0.801806	0.727817	0.7991	0.521251	0.514078	0.53127	0.439068	0.528798	0.648409	0.626579	0.644934
17N_1AP	0.213884	0.101737	0.0992736	0.0946882	0.180043	0.194779	0.220755	0.20996	0.242278	0.201791	0.176307	0.170614	0.124528	0.116505	0	0	0.0617871	0.0640394	0.0862069	0.3075	0.327846	0.408022	0.513333	0.501543	0.387826	0.350717	0.289513	0.219061	0.184874	0.206854	0.303779	0.297659	0.376106	0.394459	0.25	0.2864	0.267974	0.19244	0.147475	0.0983827	0.0347305	0.0341176	0.0634548	0.0698975	0.101406	0.144468	0.133235	0.220729	0.213275
18N_1EP	0.249743	0.395876	0.546656	0.562408	0.589376	0.550296	0.474747	0.382861	0.408496	0.388378	0.341402	0.351393	0.224125	0.258961	0.284166	0.278827	0.281747	0.261201	0.118233	0.122538	0.168349	0.186115	0.210307	0.257197	0.281025	0.248286	0.286401	0.0350385	0.125333	0.231028	0.409275	0.49857	0.46237	0.45213	0.478397	0.396898	0.359559	0.201389	0.176128	0.322517	0.306391	0.316812	0.305816	0.245177	0.222018	0.298178	0.31693	0.338125	0.356535
19N_2AP	0.595261	0.623789	0.629841	0.514932	0.472578	0.357369	0.31215	0.386412	0.444275	0.540617	0.406018	0.381474	0.495474	0.428165	0.350633	0.53014	0.626963	0.577736	0.565842	0.374134	0.187515	0.316612	0.358891	0.420937	0.40133	0.421611	0.378771	0.369221	0.358145	0.504402	0.509939	0.263458	0.201357	0.138622	0.0861476	0.0849783	0.194276	0.245192	0.420635	0.450346	0.573977	0.460536	0.45767	0.472005	0.403435	0.467459	0.517067	0.481188	0.382187
20N_2EP	0.305674	0.277172	0.272048	0.322346	0.391537	0.473087	0.500097	0.446685	0.596875	0.652676	0.592947	0.563281	0.3125	0.704593	0.649514	0.604155	0.611931	0.604109	0.427148	0.372025	0.428442	0.378378	0.179487	0.119048	0.057377	0.120202	0.104938	0.0983471	0.142717	0.0584416	0.172577	0.251701	0.596774	0.725	0.845238	0.753968	0.451247	0.515385	0.485024	0.538695	0.546362	0.548084	0.617599	0.560804	0.487544	0.402086	0.35504	0.430982	0.389198
21N_3AP	0.28496	0.249814	0.257481	0.181141	0.214894	0.336641	0.437788	0.404235	0.45961	0.458824	0.387895	0.501901	0.589091	0.614907	0.518625	0.532246	0.455281	0.516714	0.439282	0.512732	0.461538	0.487067	0.469081	0.306617	0.354957	0.3196	0.343137	0.283951	0.212766	0.475962	0.579809	0.623277	0.670573	0.711326	0.669584	0.504043	0.353535	0.402187	0.512579	0.565481	0.597753	0.612799	0.640224	0.495717	0.443247	0.377176	0.313808	0.296515	0.287487
22N_3EP	0.553333	0.552515	0.472542	0.408297	0.344143	0.312952	0.284663	0.271236	0.347764	0.466178	0.292791	0.262883	0.229281	0.18075	0.194183	0.124765	0.0891685	0.197039	0.223881	0.260422	0.356833	0.281038	0.529024	0.22561	0.110672	0.0738786	0.171657	0.0996564	0.195246	0.389166	0.356054	0.31357	0.313861	0.345221	0.296239	0.254079	0.318287	0.361685	0.253188	0.261278	0.2603	0.139241	0.0981211	0.0878505	0.3076	0.361309	0.33657	0.363499	0.343988
23N_4AP	0.113122	0.0702381	0.133142	0.130885	0.167849	0.143725	0.25617	0.352	0.401464	0.393852	0.3927	0.382564	0.307801	0.325688	0.596139	0.533508	0.489684	0.513197	0.414129	0.577743	0.713922	0.734153	0.753455	0.747451	0.155773	0.164937	0.127413	0.139831	0.287324	0.354783	0.405567	0.353553	0.248649	0.311475	0.265734	0.242347	0.183036	0.134565	0.12426	0.231504	0.423366	0.42598	0.486616	0.455792	0.408462	0.398128	0.294829	0.140962	0
24N_4EP	0.211982	0.190381	0.181298	0.151982	0.196043	0.241685	0.240088	0.315942	0.289125	0	0	0	0	0	0	0	0	0	0.394231	0.338843	0.344538	0.30597	0	0	0	0	0	0	0	0	0	0	0	0	0	0	0	0.253927	0.233173	0.206823	0.293939	0.243137	0	0	0	0	0.212766	0.184332	0.13468
25N_1AC	0.612216	0.531028	0.440914	0.47162	0.52375	0.569782	0.67423	0.646774	0.486301	0.505747	0.447863	0.351206	0.474012	0.453354	0.417921	0.391365	0.530252	0.402054	0.412782	0.446295	0.469873	0.368615	0.397133	0.388814	0.357458	0.297651	0.246545	0.268016	0.130035	0.0992685	0.137558	0.166124	0.0976431	0.115538	0.155502	0.132979	0.350877	0.625	0.556075	0.457573	0.428118	0.302732	0.235043	0.399687	0.443969	0.46089	0.490933	0.436096	0.412483
27N_2AC	0.367679	0.358019	0.303046	0.318621	0.396057	0.394527	0.428292	0.529178	0.456989	0.442843	0.44293	0.458333	0.410811	0.406922	0.280882	0.318333	0.231441	0.181122	0.332454	0.339152	0.367841	0.402778	0.437859	0.282577	0.187671	0.242081	0.156762	0.166848	0.258772	0.304348	0.322785	0.322857	0.336154	0.237288	0.272329	0.225105	0.372493	0.35153	0.391071	0.426004	0.390487	0.154329	0.124208	0.345622	0.388199	0.415842	0.421612	0.381139	0.241911
29N_3AC	0.617073	0.429837	0.442186	0.435287	0.304684	0.255197	0.193527	0.216385	0.260054	0.554933	0.673621	0.724138	0.76	0.550209	0	0	0	0	0.18007	0.193246	0.176068	0.195418	0.203735	0.270736	0.402527	0.440041	0.433	0.447777	0.309735	0.158317	0.263033	0.390504	0.410112	0.402638	0.427	0.436735	0.451389	0	0	0	0	0.188095	0.258462	0.247059	0.24	0.160173	0.366022	0.362022	0.362517
30N_3EC	0.329602	0.316201	0.393629	0.370763	0.239562	0.130087	0.147431	0.109827	0.167535	0.266565	0.256318	0.282506	0.287922	0.234181	0.299328	0.212223	0.215028	0.250919	0.109677	0.220779	0.233516	0.11879	0.0978648	0.289924	0.341866	0.361134	0.431335	0.452135	0.380619	0.290698	0.397384	0.366071	0.278732	0.221374	0	0.0894737	0.109677	0.112088	0.14	0.146341	0.340136	0.316176	0.311209	0.456647	0.39636	0.415058	0.452941	0.493264	0.546756
32N_4EC	0.343173	0.317949	0.447447	0.497136	0.650485	0.686007	0.706787	0.605018	0.522923	0.542536	0.480042	0.466504	0.401818	0.417492	0.285714	0.456284	0.430079	0.268817	0.281991	0.117066	0.135678	0.213075	0.22623	0.30848	0.35536	0.251208	0.415449	0.363934	0.300562	0.265217	0.306452	0.168317	0.108959	0.118734	0.0790123	0	0	0	0.122449	0.171053	0.203125	0.130261	0.131048	0	0.0796964	0.0777778	0.065625	0.0550459	0.171021
33N_1AP	0.350079	0.409326	0.444594	0.455798	0.53437	0.416465	0.358921	0.346577	0.390084	0.36358	0.469225	0.442352	0.353442	0.325708	0.275776	0.324833	0.239619	0.239073	0.230697	0.267954	0.3951	0.393305	0.329835	0.243612	0.204272	0.12737	0.169872	0.155542	0.237215	0.250545	0.306786	0.292003	0.261738	0.196701	0.211975	0.172024	0.464407	0.451481	0.427407	0.41999	0.334701	0.394082	0.394699	0.425865	0.427653	0.23922	0.241333	0.13655	0
34N_1EP	0.65508	0.626437	0.626943	0.403571	0.45178	0.39507	0.334015	0.359982	0.303532	0.318745	0.251579	0.340288	0.19186	0.294152	0.240163	0.323091	0.212583	0.262728	0.300199	0.355056	0.586497	0.387776	0.371845	0.375242	0.289722	0.469323	0.460494	0.372781	0.357245	0.320465	0.413898	0.496768	0.504752	0.548054	0.696944	0.423844	0.392668	0.456554	0.448264	0.497696	0.502962	0.591656	0.51189	0.543172	0.495997	0.373915	0.296949	0.211057	0.270016
35N_2AP	0.703792	0.670574	0.585541	0.578864	0.53622	0.442987	0.590476	0.617251	0.666354	0.633007	0.633597	0.626096	0.492164	0.388836	0.485039	0.609507	0.627702	0.626553	0.575609	0.554681	0.19746	0.294796	0.233619	0.308927	0.385965	0.421148	0.542519	0.569334	0.473705	0.50111	0.492261	0.645938	0.704115	0.668854	0.695601	0.709994	0.691539	0.71827	0.632408	0.622707	0.759481	0.733869	0.620098	0.609716	0.516963	0.390337	0.627288	0.580347	0.586362
36N_2AP	0.250491	0.193494	0.121123	0	0.087395	0.102804	0.106796	0.373887	0.448121	0.497539	0.598007	0.582363	0.607897	0.532695	0.449838	0.436416	0.463455	0.450549	0.476493	0.45267	0.588545	0.572664	0.585394	0.663486	0.664602	0.614849	0.461538	0.595925	0.501845	0.419003	0.246244	0.119195	0.141026	0.207692	0.367314	0.380808	0.373267	0.418274	0.0829384	0.247012	0.22082	0.10574	0.106707	0.102339	0	0.173913	0.225064	0.107579	0.121564
37N_3AP	0.434934	0.414443	0.403494	0.395683	0.456541	0.462887	0.525499	0.522346	0.285714	0.225446	0.212632	0.167033	0	0.0425894	0.331808	0.278044	0.350515	0.417085	0.217012	0.299223	0.461009	0.475129	0.391803	0.463752	0.610314	0.645566	0.649603	0.619726	0.0509338	0.190231	0.288525	0.352016	0.33615	0.289256	0.263419	0.217316	0.150215	0.203488	0.153209	0.222841	0.217557	0.196026	0.280584	0.270729	0.22544	0.165545	0.232308	0.0626398	0.0486111
39N_4AP	0.410286	0.492818	0.537097	0.577802	0.562059	0.636642	0.388826	0.192674	0.108053	0.0979215	0.247067	0.306002	0.220822	0.250991	0.380952	0.367793	0.401302	0.21346	0.275455	0.229853	0.233582	0.35	0.438454	0.529534	0.517313	0.469226	0.501697	0.362044	0.355488	0.347321	0.446265	0.438935	0.421821	0.443248	0.398904	0.371867	0.400749	0.260638	0.333816	0.379818	0.356265	0.523955	0.484877	0.524834	0.435671	0.527346	0.526341	0.459557	0.358874
41N_1AC	0.134943	0.414885	0.426277	0.333657	0.462094	0.287444	0.186441	0.169267	0.221311	0.251511	0.201117	0.217605	0.500533	0.442426	0.440957	0.505793	0.238621	0.213918	0.35175	0.370618	0.235429	0.183087	0.179744	0.0860564	0.151217	0.245777	0.309973	0.355202	0.38956	0.375738	0.499286	0.609627	0.573142	0.593891	0.557499	0.462074	0.371108	0.352973	0.449257	0.372816	0.325246	0.324366	0.29688	0.0879785	0.0394626	0.0896552	0.0562331	0.159674	0.228709
42N_1EC	0.234431	0.221091	0.284413	0.401235	0.403161	0.343212	0.444796	0.479582	0.555978	0.524985	0.494175	0.46129	0.470248	0.311278	0.213398	0.156415	0.402232	0.398799	0.461229	0.475015	0.499459	0.400924	0.518283	0.574634	0.592304	0.463079	0.377843	0.336565	0.312361	0.265625	0.309795	0.556386	0.560554	0.566158	0.560793	0.545218	0.561772	0.525116	0.5583	0.4673	0.32709	0.370632	0.529006	0.503304	0.520228	0.528255	0.459621	0.317707	0.331465
43N_2AC	0.255379	0.314645	0.380565	0.370932	0.364092	0.458949	0.454677	0.447522	0.516698	0.512179	0.413011	0.476717	0.500806	0.236735	0.16624	0.125313	0.0910747	0.0943396	0.0863061	0.185788	0.16718	0.183898	0.172507	0.283525	0.317016	0.274238	0.305666	0.383638	0.314251	0.313625	0.308753	0.262286	0.206771	0.182519	0.17631	0.174565	0.226947	0.202009	0.255206	0.342175	0.481256	0.588342	0.663111	0.654008	0.651942	0.533859	0.437481	0.293735	0.287754
44N_2EC	0.0387833	0.0885417	0.152239	0	0	0	0	0	0	0	0	0	0	0.341425	0.370025	0.37934	0.411101	0.369686	0.0844156	0.0776119	0.0809969	0.0803709	0.108055	0.180587	0.146766	0.156522	0.2199	0.178016	0.143139	0.141498	0	0	0.217143	0.186326	0.259646	0.229566	0.184937	0.277005	0.350407	0.36792	0.369113	0.376623	0.347314	0.353364	0.322392	0.203315	0.145325	0.376147	0
45N_3AC	0.28952	0.481905	0.44382	0.507442	0.568269	0.571895	0.529026	0.487276	0.497967	0.489982	0.492281	0.472069	0.49283	0.455179	0.400641	0.25	0.165871	0.374522	0.378619	0.414658	0.417436	0.411964	0.363239	0.308705	0.340046	0.307801	0.36233	0.305322	0.453871	0.438936	0.431183	0.407938	0.363758	0.145558	0.246914	0.167969	0.144295	0.321656	0.285714	0.218045	0.171598	0	0	0.124138	0.167702	0.163636	0.236253	0.23855	0.204574
46N_3EC	0.399375	0.364641	0.409651	0.448665	0.488361	0.476233	0.588545	0.540118	0.598485	0.403509	0.431771	0.388699	0.382434	0.395382	0.401503	0.438006	0.339225	0.345778	0.401074	0.358491	0.364205	0.330709	0.335684	0.472067	0.344196	0.345404	0.455978	0.30213	0.224568	0.262933	0.216058	0.202421	0.263184	0.286432	0.216514	0.326005	0.344859	0.373594	0.557338	0.634893	0.716963	0.574328	0.667802	0.604947	0.594776	0.602353	0.509714	0.382308	0.244877
49N_1AP	0.558559	0.630027	0.559563	0.542729	0.525386	0.498952	0.545055	0.357143	0.206642	0.475983	0.459744	0.454186	0.460919	0.393021	0.290826	0.275413	0.251313	0.231281	0.178378	0.218905	0.204889	0.302985	0.278646	0.366337	0.618384	0.586582	0.511659	0.519325	0.461868	0.447797	0.434856	0.361483	0.297895	0.237601	0.33457	0.374595	0.424045	0.414809	0.473398	0.361818	0.152318	0.40824	0.228261	0.15142	0.133051	0.136522	0.0885957	0.056325	0
50N_1EP	0.203857	0.454094	0.474359	0.554157	0.592377	0.674694	0.478405	0.482297	0.236082	0.614812	0.618104	0.557555	0.547333	0.572404	0.328845	0.236683	0.319238	0.291399	0.201717	0.203463	0.236794	0.242537	0.255	0.315534	0.145604	0.495974	0.473118	0.620563	0.569613	0.574803	0.470745	0.248422	0.238342	0.21899	0.205479	0.167124	0.164928	0.187173	0.118644	0.174082	0.244455	0.117582	0.0732836	0.0869176	0.0741064	0.101553	0.238304	0.32615	0.317723
51N_2AP	0.44824	0.500405	0.419322	0.379303	0.495874	0.54811	0.516233	0.756412	0.812111	0.507166	0.419343	0.320793	0.340666	0.356557	0.346257	0.313714	0.336861	0.262471	0.298391	0.312892	0.328439	0.332092	0.338896	0.230061	0.383009	0.340852	0.414167	0.54664	0.446329	0.588418	0.51419	0.543096	0.421707	0.377819	0.372294	0.319841	0.319906	0.356675	0.318253	0.413506	0.417816	0.45989	0.477695	0.520157	0.429865	0.503402	0.47822	0.572449	0.623985
52N_2EP	0.242499	0.280091	0.292018	0.332382	0.360321	0.393432	0.368938	0.418487	0.374738	0.422151	0.473275	0.435817	0.422401	0.528522	0.477949	0.46184	0.477	0.406187	0.408003	0.370823	0.370245	0.423244	0.453158	0.39403	0.504846	0.486	0.515498	0.46181	0.492868	0.509756	0.535454	0.496732	0.383442	0.325843	0.292332	0.324468	0.323364	0.261637	0.273736	0.247539	0.316378	0.464574	0.426625	0.406593	0.366273	0.0991453	0.142098	0.228956	0.291667
53N_3AP	0.675739	0.652059	0.603543	0.3878	0.342877	0.361679	0.348161	0.445521	0.588777	0.588773	0.621719	0.617274	0.518293	0.508906	0.494989	0.394046	0.179487	0.2032	0.205977	0.188105	0.184157	0.267961	0.248889	0.281848	0.399552	0.31454	0.359599	0.385351	0.33648	0.360603	0.395821	0.525476	0.472687	0.526588	0.772536	0.752461	0.741565	0.707572	0.681311	0.5548	0.548341	0.413472	0.282129	0.253597	0.331442	0.389895	0.405155	0.427639	0.305741
54N_3EP	0.102489	0.0758397	0.142037	0.0903084	0.11028	0.117732	0.0828844	0.0854127	0.0673352	0.0882629	0.0771124	0.125	0.0802175	0.086169	0.121015	0.164968	0.139935	0.289288	0.341615	0.254128	0.231977	0.127778	0.0647737	0.0758836	0.087846	0.114929	0.0834671	0.180575	0.168035	0.246338	0.263229	0.266638	0.34844	0.405562	0.445096	0.383333	0.35249	0.273622	0.343341	0.25738	0.212471	0.216216	0.179034	0.0812408	0.244265	0.334708	0.306271	0.336678	0.40678
55N_4AP	0	0	0	0.237154	0.2875	0.335766	0.256983	0.214953	0.0869565	0	0.102564	0.141176	0.131868	0.168421	0.182906	0.241087	0.44686	0.488127	0.482702	0.492509	0.485822	0.148515	0.157895	0.144231	0	0	0	0	0	0	0	0	0.233491	0.287912	0.277542	0.228777	0.253994	0.0612691	0.0684597	0.0686071	0.277966	0.261981	0.263761	0.294922	0.247328	0.21223	0.219739	0.166994	0.283925
56N_4EP	0.155511	0.319066	0.371302	0.290494	0.150754	0.138864	0	0.331762	0.328224	0.389476	0.471062	0.428401	0.518116	0.53309	0.13558	0.510531	0.525829	0.585358	0.539863	0.618866	0.148594	0.07646	0.0353172	0.0264151	0.0334288	0.117845	0.10479	0.555241	0.485542	0.507829	0.631499	0.595248	0.613702	0.712175	0.534582	0.189189	0.207461	0.272819	0.240159	0.168558	0.14557	0.075329	0.0596049	0.133464	0.165858	0.203134	0.153028	0.147968	0.117545
58N_1EC	0.251603	0.165633	0.145098	0.133478	0.121745	0.109318	0.063278	0.12874	0.113831	0.0973565	0.136949	0.144953	0.0633937	0.0786517	0.0739208	0.0174216	0.489329	0.541945	0.452527	0.413356	0.334743	0.156428	0.167532	0.368102	0.465042	0.498672	0.517574	0.272989	0.27375	0.0550285	0.254135	0.562546	0.411074	0.346188	0.348033	0.315753	0.28408	0.273751	0.295075	0.217084	0.205399	0.202539	0.226307	0.326258	0.352288	0.353529	0.331303	0.359675	0.285215
60N_2EC	0.289679	0.51109	0.578957	0.589923	0.617651	0.58744	0.737652	0.778576	0.687549	0.604364	0.604075	0.422548	0.375856	0.368861	0.37702	0.373531	0.320352	0.429049	0.465	0.425606	0.427149	0.48196	0.178135	0.177235	0.0625832	0.0762608	0.0790514	0.098778	0.355034	0.374652	0.361202	0.31531	0.208082	0.18023	0.193045	0.231945	0.288053	0.277841	0.271062	0.299392	0.296359	0.33895	0.402874	0.34018	0.280976	0.186415	0.175068	0.0891449	0.105343
61N_3AC	0.258105	0.306034	0.328197	0.326687	0.276347	0.265273	0.207351	0.216267	0.19527	0.147229	0.282172	0.289916	0.340541	0.331962	0.372283	0.396199	0.371631	0.348148	0.327559	0.238655	0.296534	0.330804	0.455224	0.484848	0.440559	0.371795	0.401434	0.106838	0.101215	0.101626	0.0932836	0	0	0	0	0.0688406	0.0702403	0.0850112	0.0913462	0.272251	0.236473	0.248945	0.15903	0.363029	0.345515	0.362018	0.37366	0.135849	0.384
63N_4AC	0.319688	0.341511	0.249194	0.217833	0.245614	0.306028	0.352531	0.21372	0.244713	0.226891	0.223757	0.221411	0.220874	0.30384	0.504836	0.511928	0.49064	0.485117	0.340245	0.243048	0.353401	0.317682	0.355124	0.396467	0.482046	0.445325	0.427798	0.393035	0.24375	0.190583	0	0.0781671	0.234188	0.262911	0.3367	0.394265	0.310469	0.278733	0.304094	0.231707	0.225429	0.234442	0.221393	0.282828	0.397386	0.496398	0.4875	0.42801	0.512346
64N_4EC	0.225711	0.284891	0.402076	0.272829	0.233869	0.240438	0.283953	0.304057	0.260106	0.260144	0.238866	0.19543	0.292916	0.444988	0.458123	0.498551	0.365241	0.304796	0.344276	0.251796	0.43662	0.377571	0.355157	0.344412	0.351769	0.438615	0.442063	0.546136	0.664955	0.475595	0.44202	0.498891	0.518571	0.393969	0.34245	0.354826	0.624826	0.623785	0.541663	0.564545	0.478339	0.469503	0.455217	0.387365	0.310422	0.231838	0.259636	0.229885	0.195407
65N_1AP	0.286982	0.106017	0.0991957	0.183521	0.164211	0.190962	0.305532	0.315466	0.278494	0.333225	0.334011	0.385662	0.391886	0.456325	0.436946	0.366656	0.352148	0.310727	0.247947	0.21652	0.109995	0.117941	0.223989	0.177445	0.225775	0.271229	0.327842	0.240143	0.217585	0.101449	0.0798751	0.0603416	0.113636	0.250417	0.248603	0.322724	0.254673	0.144019	0.14212	0.182007	0.167347	0.150315	0.131765	0.180064	0.127941	0.128889	0.156889	0.137088	0.16549
66N_1EP	0.274093	0.205357	0.202941	0.193548	0.221503	0.22679	0.290323	0.363504	0.191176	0.361111	0.412322	0.485714	0.339806	0.257388	0.262974	0.366812	0.357745	0.345512	0.357163	0.319865	0.265652	0.231169	0.354593	0.365962	0.359121	0.332033	0.262731	0.250295	0.246386	0.212473	0.270251	0.346997	0.392887	0.25938	0.268808	0.248303	0.0990917	0.114127	0.123675	0.190179	0.161648	0.144134	0.172763	0.230712	0.266937	0.266829	0.293333	0.216467	0.102861
67N_2AP	0.638484	0.736898	0.82185	0.778929	0.621096	0.588438	0.595054	0.596226	0.591398	0.57302	0.429412	0.331034	0.193798	0.110048	0.117338	0.101103	0.206273	0.21895	0.203088	0.347826	0.261438	0.247568	0.251372	0.191419	0.113182	0.230552	0.227972	0.326194	0.299087	0.305019	0.472543	0.541391	0.487654	0.44413	0.151899	0.229541	0.216165	0.176755	0.117808	0.181818	0.531194	0.541223	0.539788	0.537126	0.518428	0.642276	0.660194	0.648345	0.608856
68N_2EP	0.175325	0.184893	0.144748	0.0272109	0.0758427	0.164021	0.154603	0.186599	0.208907	0.302564	0.235067	0.366133	0.380567	0.375405	0.421446	0.420475	0.373377	0.389474	0.431667	0.348894	0.327217	0.257463	0	0	0.120482	0.0589391	0.0627615	0.196007	0.70437	0.6955	0.73575	0.723427	0.514068	0.31979	0.305382	0.593266	0.608006	0.623139	0.517893	0.122149	0.158179	0.128405	0.182217	0.25625	0.252664	0.388398	0.319859	0.302829	0.271268
70N_3EP	0.276146	0.329439	0.398506	0.394879	0.411557	0.857744	0.683074	0.673141	0.679278	0.463811	0.477569	0.470037	0.404296	0.347738	0.435079	0.454054	0.411458	0.453069	0.34128	0.250298	0.287422	0.350054	0.329751	0.318942	0.361819	0.295296	0.313019	0.227723	0.244493	0	0	0.0378096	0.13643	0.134864	0.168122	0.191321	0.28306	0.28337	0.212397	0.114525	0.0628981	0.069103	0.0455433	0.144361	0.125964	0.112546	0.157623	0.251861	0.253201
72N_4EP	0.391107	0.443885	0.373529	0.280295	0.254345	0.275733	0.19576	0.167296	0.173095	0.0808461	0.185304	0.208609	0.267694	0.389767	0.342312	0.563707	0.434653	0.3972	0.40108	0.374816	0.269643	0.309893	0.264311	0.31873	0.496005	0.455832	0.365697	0.425189	0.395361	0.252378	0.302432	0.237908	0.182731	0.0801887	0	0.0440415	0.36211	0.452273	0.41113	0.379222	0.407801	0.44244	0.618111	0.594924	0.417969	0.478945	0.457505	0.50535	0.511014
73N_1AC	0.38173	0.368966	0.365503	0.397448	0.459585	0.597341	0.489318	0.555079	0.633863	0.779278	0.679375	0.515424	0.60277	0.451322	0.497425	0.530761	0.461633	0.399393	0.289046	0.282379	0.228463	0.199061	0.486758	0.540065	0.525339	0.455193	0.325083	0.223245	0.255922	0.316702	0.324719	0.333642	0.289159	0.276518	0.258385	0.378934	0.457858	0.434202	0.479621	0.408494	0.402337	0.49983	0.393471	0.426495	0.467136	0.417811	0.336972	0.270253	0.32369
74N_1EC	0.15089	0.176685	0.331217	0.383115	0.448573	0.389511	0.336023	0.323917	0.296398	0.371221	0.383768	0.344869	0.161922	0.256993	0.242845	0.296053	0.275424	0.3771	0.41129	0.482623	0.466709	0.472437	0.44478	0.406706	0.238459	0.258493	0.205424	0.099022	0.128617	0.143541	0.110694	0.0932755	0.28655	0.307692	0.312356	0.345353	0.273343	0.118519	0.264069	0.256303	0.417266	0.334661	0.38587	0.322404	0.357002	0.461735	0.57973	0.562969	0.51587
75N_2AC	0.382313	0.485549	0.372453	0.256341	0.175269	0.154115	0.171867	0.239777	0.195354	0.375	0.512367	0.463696	0.46875	0.525232	0.686777	0.767939	0.796418	0.767797	0.735038	0.12114	0.108696	0.0833333	0.37816	0.410538	0.390805	0.465257	0.499221	0.579272	0.568113	0.603536	0.537995	0.452576	0.471272	0.558544	0.468268	0.521726	0.519255	0.41673	0.457691	0.509455	0.517331	0.492241	0.514395	0.46046	0.507362	0.508943	0.556693	0.453749	0.432605
76N_3EC	0	0	0.188312	0.227723	0.2	0.181102	0.242105	0	0	0	0	0	0	0	0.199313	0.242424	0.205128	0.316372	0.326484	0.300211	0.349609	0.402857	0.406015	0.24183	0	0.276699	0.434302	0.441558	0.419236	0.445378	0.189369	0.293814	0.360335	0.293769	0.28863	0.273481	0.253846	0.119048	0.0886525	0.607442	0.598972	0.610215	0.62765	0.638767	0.240909	0	0	0.162791	0.536765
77N_3AC	0	0	0	0.0468468	0.0517928	0.0610329	0.0471869	0.246609	0.375979	0.306383	0.425237	0.494604	0.433628	0.434395	0.178988	0.176923	0	0	0.211587	0.317774	0.344013	0.327448	0.375691	0.243902	0	0	0	0	0	0.27619	0.295316	0.309829	0.21045	0.20075	0.262542	0.268836	0.352723	0.359425	0.494194	0.426931	0.430526	0.394663	0.43897	0.285814	0.283831	0.338369	0.361071	0.57795	0.605176
79N_4AC	0.0915751	0.093633	0.0608273	0.044964	0	0	0.0698529	0.12009	0.14479	0.252315	0.273565	0.244952	0.208546	0.124691	0.241769	0.217612	0.235564	0.233716	0.0713287	0	0	0	0	0	0	0.118644	0.460815	0.492441	0.514894	0.498339	0.431803	0.268156	0.227039	0.179801	0.187523	0.274627	0.311688	0.259972	0.240594	0.126289	0.0959629	0.136494	0.221608	0.219053	0.20339	0.142857	0.146552	0.169516	0.195082
80N_4EC	0.644876	0.529657	0.552941	0.524406	0.522411	0.276276	0.268398	0.269461	0.3659	0.27656	0.364372	0.322929	0.236973	0.159309	0.0730397	0.086185	0.118343	0.259424	0.199488	0.207675	0.247059	0.241259	0.159556	0.270705	0.0772947	0.179063	0.390716	0.457917	0.431544	0.384766	0.276458	0.199528	0.133965	0.0550285	0.058	0.0937973	0.0614525	0.0609982	0.0464135	0.184054	0.235165	0.219487	0.17953	0.235467	0.178544	0.210492	0.270846	0.241803	0.337302
83N_2EC	0.216899	0.298982	0.326406	0.377487	0.262822	0.193797	0.254223	0.223038	0.127911	0.15873	0.204034	0.206401	0.253212	0.185891	0.194508	0.139476	0.0807214	0.0929068	0.098367	0.101796	0.233045	0.309095	0.280831	0.288582	0.365733	0.0458453	0	0	0.637136	0.777305	0.768908	0.771977	0.738649	0.27551	0.436658	0.108871	0.141129	0.0580431	0.116557	0.119372	0.109441	0.158111	0.122005	0.0509554	0.0509149	0	0.0371079	0.0801809	0.100791
84N_4EP	0	0	0.309897	0.372804	0.369295	0.424611	0.459612	0.406479	0.450589	0.502471	0.469488	0.525396	0.492078	0.461794	0.338542	0.174924	0.308891	0.359748	0.306436	0.245203	0.255051	0.15515	0.151651	0.201847	0.158818	0.211823	0.257004	0.304239	0.618474	0.626043	0.618711	0.567132	0.513268	0.433962	0.418605	0.188679	0.0949074	0.0829439	0.0672348	0.0234742	0.0232019	0.03367	0	0.0691358	0.248349	0.267717	0.215482	0.25964	0.287058
[truncated: 8 more columns]

## Sheet: entropy
Subjects	W1	W2	W3	W4	W5	W6	W7	W8	W9	W10	W11	W12	W13	W14	W15	W16	W17	W18	W19	W20	W21	W22	W23	W24	W25	W26	W27	W28	W29	W30	W31	W32	W33	W34	W35	W36	W37	W38	W39	W40	W41	W42	W43	W44	W45	W46	W47	W48	W49
01N_1AP	2.70805	2.70805	2.68595	2.63906	2.75167	3.07246	1.92125	2.48491	2.99707	2.902	2.68954	2.63906	2.63906	2.04319	2.14584	2.25386	1.90615	1.88916	2.45831	2.68595	2.8944	2.97614	2.91249	2.802	2.78499	2.3979	2.54004	2.30259	2.36938	2.04319	2.07944	1.94591	2.19722	1.79176	2.72555	3.42473	3.34335	3.30946	3.38335	3.04777	2.68076	2.48491	2.54004	2.07944	2.19722	2.3979	1.79176	1.79176	1.79176
02N_1EP	2.5993	2.35167	2.16396	2.36938	2.35167	1.74787	1.24245	1.66746	1.83102	2.97138	4.01117	3.946	3.94258	3.95624	3.1499	2.96942	3.15565	3.08781	2.947	2.30259	2.3979	2.27187	2.79851	2.67012	2.78779	2.61563	2.79851	2.45831	2.81336	2.56312	2.6972	2.74	2.60743	3.21468	3.22744	3.41373	3.47895	3.95211	3.83563	3.85174	3.89354	3.92486	3.51889	3.4584	3.29352	3.42807	3.20106	2.954	2.93192
03N_2AP	2.07944	2.07944	0.693147	1.03972	1.03972	1.38629	1.38629	1.60944	1.94591	2.16396	2.34199	2.62505	2.82156	2.68595	2.91249	2.84648	2.65932	2.61563	2.36938	2.27187	2.04319	2.04319	2.02533	1.90615	2.48491	2.63906	2.97851	3.01495	2.94162	2.79851	2.16396	1.94591	2.07944	2.07944	1.60944	1.38629	0.693147	0	0	0	0	1.09861	1.09861	1.38629	1.79176	2.3979	2.30259	2.36938	2.30259
04N_2EP	2.73063	2.64092	2.47715	2.57602	2.32919	2.48491	1.60944	1.94591	1.79176	2.07944	2.07944	2.48491	2.30259	2.30259	2.45831	2.63906	2.56495	2.68595	2.54004	2.58857	2.50529	2.55324	2.85318	2.65259	3.07642	3.01464	2.96857	2.99457	2.96694	2.947	2.07944	2.07944	2.42548	2.75167	2.79851	2.75167	2.79851	2.62352	2.16396	2.24297	2.26861	2.20479	2.44964	2.64995	3.34049	3.35212	3.2915	3.26924	3.01549
05N_3AP	3.33561	3.43112	2.93192	2.87148	3.19892	3.59318	3.51574	3.35499	3.42241	3.06253	2.70727	3.25066	3.04015	3.29649	3.29704	2.9915	2.87148	3.05949	3.12567	3.18646	3.5187	3.53717	3.49082	3.45346	2.91705	2.25386	1.38629	1.38629	1.38629	2.07944	2.07944	2.04319	2.04319	2.04319	0.693147	2.30259	2.48491	2.54004	2.54004	2.54004	1.38629	0.693147	1.60944	1.60944	2.19722	2.07944	1.90615	1.60944	1.60944
06N_3EP	2.04319	1.60944	1.38629	1.79176	1.94591	1.90615	1.90615	2.16396	2.36938	2.45831	2.36938	2.30259	2.30259	2.19722	2.25386	2.65055	2.65702	3.00036	3.39098	3.33434	3.4515	3.45083	2.88447	2.55324	2.16396	2.25386	2.04319	2.16396	2.35167	2.16396	2.25386	2.78779	2.89037	3.2823	3.37696	3.49315	3.20671	3.69538	3.80145	3.8422	3.80583	3.61961	2.94483	2.80076	2.79981	2.25026	2.80968	2.75192	2.72841
07N_4AP	2.19722	1.33218	1.60944	1.60944	1.38629	0.693147	0	1.60944	1.60944	2.04319	2.04319	2.02533	1.88916	2.36938	2.44102	2.67012	2.75167	2.79851	2.67012	2.61563	2.07944	2.16396	2.36938	2.75167	2.89037	2.8571	3.01408	2.98777	2.77598	2.98487	2.83413	2.68595	2.54004	2.88677	2.80756	2.93271	3.01974	1.94591	2.30259	2.30259	1.60944	1.60944	1.60944	2.45831	2.61563	2.70805	2.77259	1.60944	2.07944
08N_4EP	0	0	0	0	0	0	0	0	0	0	0	0	0	0	0	0.693147	1.03972	1.79176	1.79176	1.79176	1.94591	1.38629	0.693147	0	0	0	0	0	0	0	0	0	0.693147	0.693147	1.38629	1.38629	1.38629	1.09861	0	0.693147	0.693147	0.693147	0.693147	1.38629	1.03972	1.33218	1.33218	1.33218	0.693147
09N_1EC	2.54004	1.79176	1.79176	1.60944	1.60944	2.07944	2.16396	2.16396	1.90615	2.36938	2.30259	2.61563	2.54004	2.51266	2.35167	2.43079	2.07944	2.27187	1.74787	2.25386	2.27187	2.35167	2.16396	2.27187	2.07944	1.38629	1.79176	2.56495	2.56495	2.70805	2.81336	2.68595	2.56495	2.04319	2.09827	2.21025	2.27187	2.27187	2.45831	2.35167	1.54983	1.74787	1.94591	2.07944	2.04319	2.02533	1.56071	1.33218	1.38629
10N_1AC	2.61563	1.38629	1.09861	0.693147	0.693147	1.09861	1.33218	1.33218	1.90615	1.94591	1.94591	1.09861	1.60944	1.38629	0.693147	1.38629	1.03972	1.03972	1.90615	2.07944	2.07944	1.79176	1.79176	1.09861	0	0	0	0	0	1.09861	1.60944	1.79176	1.60944	1.60944	1.38629	0.693147	1.09861	1.09861	1.60944	1.79176	1.79176	1.60944	1.60944	1.94591	1.56071	1.03972	1.56071	2.25386	2.35167
11N_2AC	2.3979	1.38629	1.38629	2.07944	2.19722	2.19722	2.52321	2.47625	1.83102	2.09827	2.2056	1.973	2.56495	2.56495	2.58857	2.25386	2.35167	1.88916	2.81521	2.5993	2.44102	2.47996	2.9324	2.67136	2.96135	2.89419	2.83899	2.27187	1.67699	1.94591	1.94591	1.94591	2.02533	1.79176	1.74787	1.60944	2.07944	2.45831	2.52321	2.72555	2.58857	2.74364	2.71445	2.50703	2.33837	1.09861	2.63025	2.69231	2.73634
13N_3EC	2.97919	3.19382	3.1418	3.25511	2.71847	2.10658	1.90615	2.68595	2.56495	2.94123	3.04058	3.25243	2.77747	2.70727	1.60944	1.09861	1.09861	1.09861	1.60944	1.38629	0.693147	1.90615	2.30259	3.38545	3.3764	3.32526	3.38434	2.98346	2.55208	2.51266	2.80968	2.84648	2.902	2.71296	2.43079	2.52321	2.54004	2.30259	2.30259	2.07944	2.19722	2.56705	2.86871	2.91292	3.052	2.93192	2.48491	2.56495	2.5993
14N_3EC	3.12894	3.43652	3.33895	3.1627	3.19878	3.23629	3.15146	2.81336	2.70805	2.30259	2.36938	2.48491	2.48491	2.55779	3.2798	3.15345	3.15564	3.17758	3.2382	2.63639	2.83071	2.86744	2.84564	2.64844	2.76163	2.3979	3.12153	3.33102	3.31632	3.35538	3.07658	3.0063	2.3947	1.90615	2.30259	2.33837	3.05252	3.62599	3.60071	3.55794	3.26257	3.22556	3.19315	3.14613	2.47625	2.44102	1.94591	1.88916	1.79176
15N_4AC	2.2056	2.34199	1.74787	1.79176	1.56071	2.34393	2.27187	2.16396	2.14584	2.80968	4.18056	4.16019	4.1846	4.18765	3.46131	2.81336	3.3177	2.93961	3.06774	3.17393	3.5544	3.39455	3.53318	2.83899	2.97614	3.29983	3.05252	3.02803	3.21888	3.25511	2.63906	2.61563	2.68595	1.94591	2.07944	2.87148	3.74155	3.86363	3.79618	3.56795	3.62256	2.52321	2.36938	2.3979	2.30259	2.70805	3.97228	3.8235	3.86587
17N_1AP	0.693147	0	0	0	1.09861	1.09861	1.09861	1.38629	1.79176	2.02533	1.88916	1.88916	1.38629	1.38629	0	0	0	0	0	1.79176	1.60944	1.74787	2.07944	1.79176	1.60944	1.79176	1.60944	1.38629	1.09861	1.60944	1.60944	1.38629	1.79176	1.94591	1.09861	1.38629	1.09861	0.693147	0.693147	0.693147	0	0	0.693147	0	1.03972	1.56071	1.60944	1.56071	1.79176
18N_1EP	1.79176	1.94591	2.56495	2.54004	2.36938	2.25386	2.27187	2.3979	2.97851	3.09814	2.98092	3.38021	2.97614	3.14879	3.20875	3.17663	3.08719	2.98777	2.79104	2.68918	2.91705	2.99659	2.96694	2.99707	2.947	2.25386	2.19722	0	1.05492	1.73287	2.27187	2.91869	3.09245	3.10162	3.07669	2.99982	2.55208	1.33218	0.693147	1.38629	1.09861	1.09861	1.09861	1.60944	1.74787	2.39591	2.39591	2.39591	2.36938
19N_2AP	3.24901	3.04388	3.35499	3.15271	3.02803	3.00477	2.71358	2.73634	2.91743	2.84496	2.78512	2.86744	2.45831	1.83102	2.04319	2.84449	2.82701	2.83578	3.05835	3.05222	2.95433	3.61839	3.68612	3.82592	3.9344	3.83542	3.73534	3.33487	2.84676	2.5988	2.66187	2.65331	2.79851	2.73634	2.3979	2.07944	1.90615	2.04319	2.27187	2.36938	2.76559	2.63003	2.56766	2.68934	2.71938	2.27187	2.83094	2.5666	2.69801
20N_2EP	2.72491	2.7723	2.67035	3.04482	3.22252	3.10643	3.09404	3.15052	3.55876	3.62073	3.25981	2.71939	1.88916	2.94194	3.06999	3.2085	3.54308	3.55979	3.39649	2.89976	2.36938	1.38629	0	0	0	0.636514	0.636514	0.636514	1.03972	0	0.693147	0.693147	0.693147	0.693147	1.09861	0.693147	1.60944	2.07944	2.04319	2.36938	2.56495	2.30259	2.48491	2.16396	1.79176	1.79176	1.79176	1.79176	2.36938
21N_3AP	2.63906	2.48491	2.68595	1.74787	1.74787	1.90615	1.94591	1.60944	1.90615	1.90615	1.74787	2.19722	2.07944	2.16396	2.45831	2.8571	2.83321	2.96502	2.78779	3.00477	2.81336	2.84648	2.52321	1.90615	1.94591	1.94591	1.79176	1.09861	0.693147	1.94591	2.30259	1.90615	2.16396	2.16396	1.79176	1.38629	0.636514	1.79176	1.94591	1.79176	1.94591	2.16396	2.3979	1.94591	2.19722	2.07944	1.79176	1.94591	2.07944
22N_3EP	2.54004	2.54004	2.44102	2.16396	2.47622	2.09473	2.09473	1.9792	1.60944	1.94591	2.40364	2.40364	2.39331	1.9792	1.79865	1.33218	1.38629	2.27187	2.83899	2.73634	2.73634	2.19722	1.94591	0.693147	0	0	0.693147	0	1.09861	2.97138	2.91806	2.97138	3.0247	3.05252	2.07944	1.74787	1.90615	2.19722	1.38629	1.38629	1.38629	1.09861	0	0	1.38629	1.03972	1.09861	1.38629	1.79176
23N_4AP	1.09861	0.693147	1.09861	1.09861	1.09861	1.09861	1.32966	1.94591	2.36938	2.27187	2.27187	1.88916	1.32966	1.38629	2.04319	2.27187	2.68595	2.75167	3.18646	3.41448	3.91913	3.85333	3.83899	3.83054	0.693147	0.693147	0	0	1.79176	1.79176	1.79176	1.79176	1.60944	1.60944	1.60944	1.60944	1.38629	0.693147	0.693147	1.60944	2.19722	2.27187	2.56495	2.83321	2.83321	2.19722	1.38629	0	0
24N_4EP	1.60944	1.09861	1.09861	0.693147	1.09861	1.09861	1.09861	1.09861	1.09861	0	0	0	0	0	0	0	0	0	0	0	0	0	0	0	0	0	0	0	0	0	0	0	0	0	0	0	0	0.693147	0.693147	0.693147	0.693147	0.693147	0	0	0	0	0	0	0
25N_1AC	2.56495	2.04319	1.94591	1.79176	1.94591	2.07944	1.94591	1.94591	1.60944	1.79176	1.79176	1.94591	2.19722	2.30259	2.3979	2.07944	2.48491	2.07944	2.07944	2.19722	2.54004	2.3979	2.45831	2.61563	2.54004	2.19722	1.56071	1.60944	0.693147	0.693147	0.693147	1.09861	0.693147	0.693147	0.693147	0	0.693147	1.60944	2.07944	1.94591	1.94591	1.74787	1.56071	2.04319	2.04319	2.02533	2.27187	2.09827	1.38629
27N_2AC	2.45831	2.52321	2.36938	2.67035	2.55324	2.55208	2.55368	2.68954	1.94591	2.07944	1.90615	1.74787	1.60944	1.79176	1.09861	1.09861	0.693147	0.693147	1.09861	0.636514	1.03972	1.33218	1.35178	1.32966	1.03972	1.79176	1.38629	1.38629	1.79176	1.79176	1.60944	1.79176	2.07944	1.60944	1.79176	1.60944	2.19722	1.94591	1.90615	1.94591	1.94591	1.38629	1.09861	1.79176	1.79176	2.07944	1.79176	1.79176	0.693147
29N_3AC	1.88916	2.02533	2.02533	2.27187	2.35167	2.04319	1.94591	2.07944	1.94591	1.94591	1.79176	1.60944	1.60944	1.60944	0	0	0	0	0.693147	0.693147	0.693147	1.09861	1.09861	1.38629	1.79176	1.79176	1.79176	1.79176	1.60944	0.693147	1.60944	2.07944	2.36938	2.30259	2.19722	1.94591	1.38629	0	0	0	0	0	0	0	0	0	1.09861	1.09861	1.09861
30N_3EC	1.60944	1.60944	1.94591	1.94591	1.94591	1.38629	1.60944	0.693147	1.09861	1.79176	1.94591	1.90615	1.90615	1.79176	1.94591	1.79176	1.60944	1.38629	0	0	0	0.693147	0.693147	2.04319	2.27187	2.27187	2.27187	2.47996	2.16396	1.94591	2.16396	2.04319	1.60944	1.09861	0	0	0	0	0.693147	0.693147	1.09861	1.09861	1.09861	1.79176	1.94591	2.07944	2.07944	1.90615	2.30259
32N_4EC	1.38629	1.38629	1.79176	1.94591	2.19722	2.19722	2.19722	2.48491	1.90615	1.79176	2.19722	2.07944	1.60944	1.94591	1.38629	1.90615	2.07944	1.38629	1.60944	0.693147	0.636514	0.950271	1.03972	1.33218	1.56071	0.693147	1.38629	1.38629	1.38629	1.09861	1.38629	0.693147	0	0	0	0	0	0	0	0	0	0	0	0	0	0	0	0	1.38629
33N_1AP	2.91806	3.0997	2.91968	3.28149	3.00477	2.52321	2.30259	2.07944	2.31142	2.21025	2.21025	2.39591	1.94591	1.79176	1.79176	2.20479	1.94591	2.07944	1.94591	2.07944	1.90615	1.94591	1.94591	1.60944	1.56071	1.38629	1.79176	1.60944	2.30667	2.77259	3.07522	3.09104	3.09104	2.3979	2.36938	1.94591	2.52321	2.67012	2.47996	2.5666	2.30259	2.09827	1.83437	2.14584	2.14584	1.38629	1.09861	1.09861	0
34N_1EP	2.3979	2.36938	2.35167	1.90615	2.07944	2.07944	1.56071	2.70805	2.92642	3.05252	3.03911	2.84431	2.24504	2.25386	2.07944	1.88916	1.74787	1.90615	1.90615	2.52321	3.26088	3.29782	3.24739	3.40693	3.25235	3.04322	3.12692	3.26458	3.14309	3.16164	3.1091	3.452	3.58519	3.39907	3.24148	2.44102	2.82156	3.08048	3.05388	3.20877	3.3711	3.46961	3.50424	3.50047	3.34752	3.05936	2.30462	1.83102	2.77097
35N_2AP	4.0687	3.84181	3.55148	3.55664	3.25696	3.08465	3.08719	3.11888	3.6175	3.70909	3.76732	3.67659	3.57027	3.23231	3.35585	3.69919	3.95338	3.9229	3.95002	3.46912	1.90615	2.4117	2.59732	2.91969	3.07898	3.35514	3.46184	3.60157	3.40719	3.59131	3.35996	3.75851	3.68959	3.86475	3.93506	3.60539	3.70481	3.94325	3.88148	3.69069	3.65536	3.90255	4.08274	4.08874	3.80998	3.4164	3.77132	3.81813	3.87776
36N_2AP	1.60944	1.38629	0.693147	0	0.693147	0.693147	0.693147	2.19722	2.07944	2.07944	2.30259	2.3979	2.16396	2.04319	1.94591	1.79176	1.79176	1.60944	1.79176	1.60944	2.36938	2.36938	2.54004	2.5993	2.54004	2.27187	2.07944	2.35167	2.04319	2.04319	1.74787	0.693147	0.693147	1.09861	2.07944	1.79176	1.79176	1.94591	0	0.693147	0	0	0	0	0	0	0.693147	0.693147	1.09861
37N_3AP	2.36938	2.16396	2.04319	2.07944	2.04319	1.74787	1.66746	1.49418	1.03972	1.09861	1.09861	0.693147	0	0	1.94591	1.94591	2.19722	2.19722	1.03972	1.33218	2.04319	1.74787	1.79176	2.68595	3.29341	3.25678	3.22297	3.20192	0	1.09861	1.56071	1.94591	1.94591	1.94591	1.79176	1.60944	1.09861	1.09861	0.693147	1.09861	1.38629	1.38629	1.79176	1.79176	1.38629	0.693147	1.09861	0	0
39N_4AP	2.30259	2.04319	2.71519	2.68202	2.64916	2.19722	2.19722	2.19722	1.33218	1.33218	1.73287	1.88916	2.07944	2.07944	1.94591	2.07944	2.07944	1.56071	1.94591	2.07944	1.94591	1.90615	2.14584	2.48491	2.48491	2.3979	2.25386	2.45831	1.74787	2.07944	2.52321	2.5993	2.63025	2.73634	2.65932	2.07944	2.30259	1.66746	1.90615	1.90615	1.56071	1.90615	2.07944	2.16396	2.19722	2.63906	2.63906	2.56495	1.94591
41N_1AC	1.03972	2.65259	2.65259	2.71847	2.623	2.36938	1.60944	1.60944	1.60944	1.94591	1.94591	2.04319	3.58055	3.57042	3.57893	3.56742	2.62616	1.79176	2.5993	2.5666	2.40364	2.48833	2.54004	1.97225	2.20479	2.55324	2.35167	2.51266	2.51266	2.623	2.63025	3.25511	3.15804	3.18367	3.08672	3.10797	2.75167	2.54004	2.95467	2.81521	2.75219	2.71296	2.75555	1.38629	0	1.09861	0.693147	1.38629	1.79176
42N_1EC	2.01981	2.3979	2.73634	2.79851	2.89037	2.63906	2.81336	2.5993	2.85211	2.86882	2.89144	2.73153	2.84672	2.27187	2.16396	1.94591	2.86882	2.85984	2.84286	2.86985	2.83513	2.25386	2.84564	3.15163	3.38849	3.29808	3.15483	2.8571	2.96502	3.03514	2.91249	3.28089	3.29473	3.40222	3.45917	3.69995	3.43901	3.33259	3.57517	3.19037	2.91705	3.05936	3.09814	3.00648	3.02335	3.26633	3.2761	2.70805	2.61563
43N_2AC	1.03972	1.90615	2.31142	2.40364	2.31142	2.87347	2.94162	3.01495	3.17608	3.17015	2.54004	2.54004	2.54004	1.60944	0.693147	0	0	0.693147	0.693147	1.38629	1.38629	1.38629	1.09861	1.60944	1.09861	1.38629	1.60944	1.94591	2.16396	2.04319	1.83437	1.88916	2.25386	1.56071	1.33218	1.56071	2.02533	2.30349	2.55751	2.90936	3.04183	3.36019	3.52724	3.56263	3.5649	3.54406	2.94901	2.09473	2.24297
44N_2EC	0	0	0	0	0	0	0	0	0	0	0	0	0	2.07944	2.07944	2.07944	2.07944	2.19722	0	0	0	0	0	0	0.693147	1.09861	1.74787	1.56071	1.33218	1.38629	0	0	1.09861	1.09861	1.38629	1.38629	1.09861	2.07944	2.27187	2.27187	3.07522	3.01464	2.62505	2.62352	2.59683	2.07944	1.09861	1.09861	0
45N_3AC	0.693147	1.09861	1.38629	1.38629	1.90615	2.27187	2.16396	1.89379	2.09827	1.90615	2.04319	2.04319	2.16396	1.973	1.60944	1.38629	1.38629	1.60944	1.79176	2.07944	1.94591	2.19722	2.43079	2.30462	2.21107	2.11865	2.22003	1.74787	2.27187	2.19722	2.30259	2.19722	2.07944	0.693147	1.09861	0	0	0.693147	0	0	0	0	0	0	0	0	1.09861	1.09861	1.38629
46N_3EC	3.17838	3.33106	3.40835	3.28389	3.0352	2.87165	3.05252	3.09814	3.09046	2.68202	3.02681	3.27122	3.12295	3.09216	2.65932	2.35167	1.88916	1.90615	2.27187	1.94591	1.79176	1.60944	1.60944	1.38629	1.38629	1.60944	1.79176	1.60944	1.60944	2.02533	2.36938	2.27187	2.27187	2.16396	1.74787	1.79176	1.60944	2.16396	2.61563	2.63906	2.89037	3.1418	3.41151	3.29105	3.26812	2.85856	2.75167	2.27187	2.54004
49N_1AP	2.70831	2.19722	2.27187	1.74787	1.79176	1.79176	1.79176	1.38629	0.636514	2.47625	2.5666	2.48833	2.39591	2.47912	2.02533	2.02533	2.04319	2.19722	1.38629	1.38629	1.38629	1.33218	0.693147	0.693147	1.94591	2.07944	2.54004	2.83899	2.86703	2.72841	2.52455	2.16396	2.07944	1.60944	2.19722	2.48491	2.30259	2.27187	2.19722	1.38629	0	0.693147	0	0.693147	1.09861	1.09861	0.693147	0	0
50N_1EP	1.38629	2.48491	2.68595	2.96502	3.12029	3.07522	2.56495	2.48491	1.60944	3.29612	3.29768	3.22252	3.22252	3.2411	1.94591	1.94591	2.04319	2.07944	1.38629	1.38629	1.38629	1.38629	1.09861	1.38629	0.693147	1.79176	1.79176	2.79851	2.73634	2.97851	3.47064	3.41476	3.31656	3.28908	3.26067	2.91678	2.84555	2.85916	2.27187	1.94591	2.36938	1.90615	1.74787	1.79176	1.74787	2.70977	2.70194	2.90131	2.90131
51N_2AP	3.62821	3.68732	3.47995	3.19989	3.58253	3.84835	3.67708	3.84144	3.90386	2.69801	2.87822	2.62505	2.36938	2.45831	2.11928	1.96524	2.11521	2.11521	2.61563	2.81082	3.24324	3.28653	3.28425	2.83148	2.80968	2.60992	3.64056	3.7054	3.37565	3.4716	3.01166	3.11984	2.99242	2.88962	3.27066	3.42301	3.2854	3.44444	3.20861	3.29125	3.50189	3.45068	3.79009	3.73926	3.64854	3.73538	3.64487	3.58086	3.61533
52N_2EP	2.3979	2.70805	2.70805	2.63906	1.90615	2.04319	2.19722	2.36938	2.30259	2.48491	2.67012	2.35167	2.13833	2.27187	2.27187	2.07944	2.19722	2.3979	2.68595	2.56495	2.56495	2.19722	2.56495	1.79176	2.07944	1.79176	1.94591	2.25386	2.35167	2.07944	2.19722	2.19722	1.94591	1.33218	1.09861	1.09861	1.03972	1.09861	1.38629	1.09861	1.56071	2.04319	1.94591	1.94591	1.60944	0.693147	1.09861	1.09861	1.60944
53N_3AP	3.28498	3.23756	3.23348	2.91705	2.83321	2.92069	3.08672	3.1731	3.07108	2.72549	3.0276	3.22192	2.97614	2.9252	2.8571	2.61563	1.94591	1.94591	1.09861	1.03972	1.03972	1.74787	1.79176	2.07944	2.36938	2.54004	2.67012	2.81336	3.16044	3.01974	2.87165	2.88617	2.2783	2.56495	3.72161	3.68075	3.84198	4.02398	3.98714	3.53331	3.58816	3.02803	2.19722	2.34199	2.37498	2.37498	2.28927	2.28927	2.02533
54N_3EP	0.693147	0.693147	1.60944	1.79176	2.16396	1.90615	1.60944	1.60944	0	0	0	1.09861	1.09861	1.38629	1.60944	2.04319	1.90615	2.15353	1.90728	1.60944	1.58109	1.09861	0.693147	0.693147	0.693147	1.09861	0.693147	1.38629	1.79176	2.36938	2.45831	2.54004	2.44102	1.79176	2.04319	2.27187	2.27187	2.19722	2.27187	1.79176	1.38629	1.38629	1.38629	0.693147	2.07944	2.16396	2.14584	2.16396	2.16396
55N_4AP	0	0	0	0.693147	1.09861	1.09861	1.09861	1.09861	0	0	0	0	0	0.693147	1.09861	1.38629	1.90615	1.90615	1.79176	1.60944	1.94591	0.693147	0.693147	0.693147	0	0	0	0	0	0	0	0	1.09861	1.09861	1.09861	1.38629	1.38629	0	0	0	0.693147	0.693147	0.636514	1.03972	1.38629	1.09861	1.09861	0.693147	1.09861
56N_4EP	1.60944	1.94591	1.79176	1.60944	1.09861	0.693147	0	2.80299	2.90073	3.10649	3.37034	2.96839	2.97138	2.902	1.03972	2.74632	2.74632	2.79956	2.85052	2.90422	1.38629	1.09861	0	0	0	0	0	1.74787	1.74787	3.59318	3.70376	3.73541	3.73541	3.74312	2.77259	1.03972	1.79176	2.35167	2.51266	2.44102	2.34393	1.54983	1.33218	2.07944	2.07944	2.24504	2.24504	2.04319	1.33218
58N_1EC	2.04319	1.60944	1.09861	1.09861	1.09861	1.09861	0.693147	1.38629	1.60944	1.38629	1.38629	1.38629	0	0	0	0	2.87148	3.02803	3.07522	3.12029	2.902	1.60944	1.79176	2.4337	2.44121	2.51053	2.51053	1.38629	1.60944	0	1.38629	2.56495	2.64916	3.01463	3.06029	3.06243	2.44102	2.36938	2.58857	2.65259	2.57962	2.65932	2.35167	2.02533	2.19722	2.19722	2.19722	2.07944	1.09861
60N_2EC	1.90615	2.83321	3.42764	3.459	3.52716	3.47439	3.63309	3.67693	3.66009	3.64556	3.73168	3.00477	3.1418	3.09046	2.97851	2.54004	1.79176	2.91249	2.85801	2.94014	2.8862	2.93454	1.33218	1.33218	0	0.693147	0.693147	1.09861	1.94591	1.88916	2.04319	1.90615	1.88916	1.88916	1.8867	2.62617	2.94627	2.84288	2.81912	2.84632	2.92379	2.93616	2.76714	2.79956	2.47625	1.973	1.73287	1.09861	1.38629
61N_3AC	1.38629	1.38629	1.38629	1.38629	1.09861	1.38629	1.94591	1.94591	1.79176	1.09861	1.60944	1.09861	1.38629	1.79176	1.94591	1.74787	1.74787	1.56071	1.33218	1.09861	1.79176	1.60944	1.94591	1.79176	1.38629	0.693147	1.09861	0	0	0	0	0	0	0	0	0	0	0	0	1.38629	1.09861	1.09861	1.09861	1.94591	1.38629	1.60944	1.60944	0	1.03972
63N_4AC	1.38629	1.60944	1.60944	1.38629	1.09861	1.38629	1.38629	0.693147	0.693147	0.693147	0.693147	0.636514	0.636514	1.33218	1.90615	1.94591	1.79176	2.07944	1.94591	1.60944	2.04319	2.07944	1.94591	1.94591	1.94591	1.60944	1.38629	1.38629	1.09861	0.693147	0	0	0.693147	1.09861	1.38629	1.60944	1.94591	1.60944	1.90615	1.74787	1.74787	1.79176	1.60944	2.30259	2.54004	2.61563	2.5993	2.58231	2.48491
64N_4EC	1.94591	2.07944	2.70805	2.5993	2.68595	2.89793	3.08719	2.91902	2.95304	2.91249	2.81888	2.5896	2.97614	3.00477	2.99659	3.34736	2.98986	2.46221	2.66847	2.57167	2.96694	3.07584	3.13244	2.99548	3.33111	3.14458	2.83321	2.48491	2.75167	2.73634	2.75104	3.14613	3.11071	2.96284	3.01974	3.21975	3.37595	3.35643	3.27868	3.30417	3.17089	3.21203	3.16327	3.44575	3.19864	2.79369	2.9924	2.92069	2.69801
65N_1AP	1.60944	0	0	1.09861	0.693147	1.38629	2.04319	2.04319	1.74787	2.66539	2.30349	2.09473	2.09473	2.58231	2.3947	2.40364	2.5899	2.63056	2.65331	2.44102	1.38629	1.60944	2.02533	1.74787	2.04319	2.30259	2.48491	2.07944	2.07944	1.38629	1.60944	1.09861	2.19722	2.62505	2.69231	2.62505	2.30462	1.38629	1.38629	1.94591	1.38629	1.09861	1.33218	1.33218	1.09861	1.09861	1.03972	1.94591	1.79176
66N_1EP	1.79176	1.09861	1.09861	1.09861	1.38629	1.38629	1.38629	1.60944	0	1.09861	1.38629	1.79176	1.79176	1.94591	2.36938	3.04285	2.8657	2.85079	2.98777	2.3979	2.14584	2.27187	2.68595	2.68595	2.44102	2.5993	2.24297	2.50703	2.65932	2.71296	2.50529	2.72835	2.79851	2.48491	2.48491	2.07944	1.09861	1.38629	1.09861	1.79176	1.60944	1.79176	2.07944	2.04319	2.19722	2.19722	2.07944	1.74787	1.09861
67N_2AP	2.44102	2.52321	2.58231	2.81336	2.96502	2.3979	2.27187	1.94591	2.07944	1.60944	1.60944	1.60944	1.03972	0.693147	0.693147	0.693147	1.38629	1.38629	1.38629	1.90615	1.79176	1.38629	1.38629	1.33218	0.636514	1.03972	1.03972	1.33218	0.693147	1.09861	1.33218	1.33218	1.33218	1.33218	0.693147	1.09861	1.09861	0.693147	0	0	1.09861	1.09861	1.09861	1.79176	1.79176	2.77259	2.77259	2.83321	2.70805
68N_2EP	1.38629	1.38629	1.38629	0	1.09861	1.79176	1.60944	1.60944	1.79176	1.94591	1.38629	1.60944	1.09861	1.09861	1.60944	1.38629	1.38629	1.38629	1.38629	1.09861	0.693147	0.693147	0	0	0	0	0	1.09861	3.97882	3.97882	3.97882	3.97882	3.3322	1.74787	1.74787	2.87148	2.87148	2.92642	2.5993	1.33218	1.56071	1.33218	1.73287	1.33218	1.38629	1.90615	1.33218	1.33218	1.60944
70N_3EP	2.5993	2.5993	1.66746	1.74787	1.90615	3.8164	3.71847	3.82061	3.81768	3.37431	2.78047	2.88924	2.65259	2.45158	3.14539	2.98531	3.11024	3.07108	2.54004	1.94591	2.30259	2.30259	2.63906	2.36938	2.54004	1.79176	1.79176	1.09861	1.09861	0	0	0	1.09861	1.09861	1.38629	1.60944	1.74787	1.74787	1.54983	1.33218	0.693147	1.09861	0.693147	1.60944	1.38629	1.09861	1.09861	1.60944	1.38629
72N_4EP	2.93616	2.91439	2.99659	2.81521	2.64916	2.87822	2.87545	2.42548	2.39058	1.67699	1.60944	2.14584	2.10658	2.27187	2.19722	2.36938	2.04319	2.07944	2.19722	2.19722	1.79176	1.79176	2.19722	2.19722	2.70805	2.48491	2.56495	2.70805	2.63906	1.94591	1.94591	1.09861	1.09861	0.693147	0	0	1.47508	2.32219	3.08562	3.31988	3.38647	3.39314	3.29972	2.77515	2.20479	2.30634	3.0276	3.1913	3.29279
73N_1AC	2.97683	2.98092	2.94014	3.01408	2.61563	3.14439	3.28334	3.64929	3.57839	3.61591	3.47404	3.23641	3.42473	3.37919	3.47809	3.25078	3.20461	2.69945	2.61747	2.34574	2.36938	2.19722	2.78779	3.04482	3.06253	3.01495	2.96502	1.79176	2.36938	2.67012	2.58857	2.61563	2.97851	2.9922	2.84275	2.95598	3.06056	3.03267	3.06056	2.75167	2.56495	3.21726	2.87822	3.11548	3.47241	3.29341	2.85079	2.85079	3.23251
74N_1EC	1.79176	2.07944	2.50703	2.91249	3.18478	3.14458	2.91806	3.01617	2.9508	3.04504	3.06876	2.99552	1.90615	2.07944	1.94591	1.79176	1.94591	2.27187	2.19722	2.19722	2.19722	2.11002	1.90615	1.90615	2.14584	2.09473	2.55779	1.56071	1.38629	1.38629	1.09861	0.693147	1.77214	1.63135	1.63135	1.63135	1.79176	0	0.693147	0.693147	1.38629	1.09861	1.38629	1.09861	1.38629	2.30259	3.07522	3.16342	3.16342
75N_2AC	2.68595	2.56495	2.30259	1.90615	2.04319	2.04319	2.16396	2.36938	1.60944	1.56071	2.01981	2.27187	2.19722	2.19722	3.09046	3.13549	2.99573	3.04452	2.99573	0.693147	0	0	1.56071	1.56071	1.56071	1.74787	2.30259	2.36938	2.35167	2.55779	2.72555	2.78779	2.902	3.20478	3.16342	3.04482	3.09104	2.70805	2.53259	2.75555	2.67012	2.79851	2.87148	2.35167	2.51266	2.67012	2.5993	2.04319	2.04319
76N_3EC	0	0	0	0	0	0	0	0	0	0	0	0	0	0	0.693147	0.693147	0.693147	1.38629	1.38629	1.38629	1.60944	1.38629	1.09861	0	0	1.38629	1.60944	1.79176	1.79176	1.94591	0.693147	0.693147	1.09861	0.693147	0.693147	0.693147	0.693147	0	0	2.3979	2.48491	2.3979	2.3979	2.3979	0	0	0	0	1.38629
77N_3AC	0	0	0	0	0	0	0	1.60944	1.56071	1.56071	2.35167	2.36938	2.16396	2.07944	0	0	0	0	0.693147	1.38629	1.38629	1.38629	1.38629	0.693147	0	0	0	0	0	1.09861	1.09861	1.09861	1.09861	1.09861	0.693147	0.693147	1.60944	1.56071	1.79176	1.79176	1.79176	1.09861	1.74787	2.04319	2.04319	2.45831	2.58857	2.55779	2.77372
79N_4AC	0	0	0	0	0	0	0.693147	0.693147	0.693147	1.94591	2.19722	1.94591	2.07944	1.38629	1.38629	1.38629	1.38629	1.09861	0.693147	0	0	0	0	0	0	0	1.09861	1.60944	1.94591	2.3979	2.27187	2.07944	1.90615	2.3979	2.16396	2.27187	2.27187	2.19722	1.79176	1.09861	1.60944	1.83102	1.83437	1.83437	1.83102	1.09861	1.09861	1.09861	1.09861
80N_4EC	2.30259	2.07944	2.07944	2.07944	1.94591	1.09861	0.693147	1.09861	1.60944	1.38629	1.79176	1.79176	1.33218	1.38629	0.693147	0.693147	0.693147	1.09861	1.09861	1.38629	1.60944	1.60944	1.09861	1.38629	0	0.693147	1.33218	1.56071	1.90615	1.90615	1.60944	1.38629	1.09861	0	0	0.693147	0	0	0	1.38629	1.09861	1.09861	1.09861	2.07944	1.79176	1.90615	2.07944	1.38629	1.38629
83N_2EC	2.19722	2.61563	2.75167	2.96502	2.79851	2.72555	2.35167	2.13833	1.60944	1.60944	2.19722	2.33837	2.58231	2.58231	2.71847	2.77385	2.36938	2.04319	1.94591	1.38629	2.55208	2.82984	2.82984	2.82984	2.79498	0.693147	0	0	3.48507	3.6965	3.69873	3.70703	4.15768	1.38629	1.38629	0	0.693147	0.693147	1.94591	1.74787	1.90615	2.16396	2.04319	1.38629	1.38629	0	0.693147	1.38629	1.60944
84N_4EP	0	0	1.74807	1.74807	1.89379	2.33837	2.36938	1.94591	2.16396	2.25386	2.30259	2.24504	2.02533	2.02533	1.79176	1.60944	1.60944	2.19722	2.36938	2.15901	2.48299	2.16396	2.07944	1.60944	1.09861	1.09861	1.38629	1.60944	2.3979	2.30259	2.3979	2.63025	2.39591	1.83437	1.83437	1.09861	0	0.693147	0.693147	0	0	0	0	0	1.38629	1.60944	2.07944	2.54004	2.52321
[truncated: 8 more columns]

## Sheet: PSD
Subjects	W1	W2	W3	W4	W5	W6	W7	W8	W9	W10	W11	W12	W13	W14	W15	W16	W17	W18	W19	W20	W21	W22	W23	W24	W25	W26	W27	W28	W29	W30	W31	W32	W33	W34	W35	W36	W37	W38	W39	W40	W41	W42	W43	W44	W45	W46	W47	W48	W49
01N_1AP	-1.67557	-1.46502	-1.53887	-1.89116	-2.24453	-2.12546	-2.06838	-2.0446	-1.74536	-1.8726	-2.03583	-2.09871	-2.07685	-2.09211	-1.90946	-2.38538	-2.60862	-2.47122	-2.3271	-2.3118	-2.27017	-2.20001	-2.0624	-1.96911	-2.10793	-2.09263	-2.09438	-2.10816	-2.12267	-2.22545	-1.83022	-1.82896	-1.82784	-2.22503	-1.8962	-1.52918	-1.71875	-2.32526	-2.18199	-2.13861	-1.952	-1.64056	-1.72737	-1.74783	-1.62736	-1.70614	-1.92063	-2.24374	-1.95897
02N_1EP	-2.06849	-1.71007	-1.92026	-1.87493	-2.45089	-2.45801	-2.38203	-2.00647	-2.17166	-2.14955	-1.91305	-1.44777	-1.11815	-1.33712	-1.51184	-2.24135	-1.60305	-1.50811	-1.53496	-2.08552	-2.0443	-1.88433	-1.88989	-1.69464	-1.58502	-2.167	-2.13153	-2.50555	-1.61494	-1.61891	-1.35456	-2.19028	-2.11967	-1.52411	-1.59413	-1.4808	-1.40989	-1.46623	-1.75319	-2.05038	-2.1701	-2.03215	-1.81679	-1.8389	-2.0559	-1.78887	-1.8979	-2.25834	-2.06611
03N_2AP	-1.67574	-1.33287	-1.63676	-1.69501	-1.66877	-1.68569	-2.11879	-2.07674	-2.11747	-2.17043	-2.2332	-1.79198	-1.81777	-2.22764	-2.17797	-1.97363	-1.90354	-1.24164	-1.51849	-1.76552	-2.09337	-2.33334	-1.94292	-1.98142	-1.72666	-1.83573	-2.18864	-2.31735	-2.26034	-2.39527	-2.4604	-2.29881	-2.05862	-1.99881	-2.37779	-2.32571	-1.97587	-1.72785	-1.77319	-1.7127	-2.0548	-2.00104	-1.7906	-1.73956	-2.02548	-2.41156	-1.91266	-1.55938	-1.63395
04N_2EP	-1.8372	-1.6956	-1.53814	-1.37673	-1.67946	-1.60243	-1.59065	-1.62016	-1.78533	-1.89278	-1.88609	-1.72151	-1.55241	-1.66836	-1.79546	-1.66074	-1.64335	-1.54595	-1.8052	-1.77191	-1.60813	-1.29643	-1.58645	-1.8806	-2.05204	-1.93752	-2.01672	-1.63995	-1.9111	-1.75072	-1.5012	-1.39972	-1.49408	-1.55411	-2.10337	-1.84897	-1.57437	-1.29822	-1.0707	-1.07063	-1.91578	-1.92992	-1.91768	-2.07099	-1.6795	-1.69524	-1.13651	-1.302	-1.54035
05N_3AP	-1.96666	-1.92493	-1.83658	-2.07066	-2.25748	-1.82285	-1.84426	-1.87897	-2.50049	-2.35894	-2.50536	-2.33261	-2.21198	-2.40485	-2.37656	-1.92799	-1.71105	-1.77033	-2.31879	-2.06597	-1.94148	-1.90865	-1.43649	-1.39429	-1.40993	-1.72974	-1.69405	-1.62157	-1.53106	-1.53904	-1.57464	-1.81927	-2.35582	-2.00109	-1.88545	-1.54173	-1.73796	-1.84093	-2.18624	-1.48584	-1.67302	-2.00427	-2.29351	-2.86558	-2.06064	-1.54731	-1.61314	-1.29108	-1.90245
06N_3EP	-1.87914	-1.90731	-1.50508	-1.72791	-1.77023	-1.80066	-1.40127	-1.7369	-1.60752	-1.65633	-1.78719	-2.14795	-1.96193	-1.74391	-1.85345	-1.94461	-1.73948	-1.57042	-1.4773	-1.48205	-1.51236	-1.5074	-1.78423	-2.06254	-2.28649	-2.13999	-2.19609	-1.99027	-1.82379	-1.92044	-2.082	-1.98838	-2.01184	-1.93174	-2.12122	-2.01927	-2.17655	-2.01381	-1.86978	-1.81559	-1.95685	-2.16275	-2.18035	-2.17174	-2.21982	-2.20519	-2.29695	-1.913	-1.93042
07N_4AP	-2.19921	-1.95916	-1.95392	-1.83423	-1.83047	-2.11992	-1.87618	-1.80403	-1.91179	-2.06986	-1.81623	-1.77875	-1.30567	-1.46399	-1.95413	-2.79132	-2.195	-1.22323	-1.52164	-1.72067	-1.81173	-1.66449	-1.78531	-2.04919	-2.20977	-2.023	-1.63912	-1.67714	-2.03193	-2.53553	-2.4656	-2.08281	-1.92333	-1.84548	-1.86583	-1.43073	-1.74286	-1.84997	-2.11957	-1.91359	-1.36757	-1.50282	-1.59434	-1.85368	-1.78908	-2.21586	-2.0575	-1.97616	-1.79975
08N_4EP	-1.5622	-1.85616	-2.17752	-2.52298	-2.45401	-2.23454	-2.07052	-2.01388	-2.32043	-1.93039	-2.05117	-2.10082	-2.19324	-2.10944	-2.04388	-2.14933	-2.22571	-2.0714	-1.91876	-1.94875	-2.01272	-1.71665	-1.87917	-2.05933	-2.29722	-2.37182	-2.31052	-1.98001	-2.03363	-2.02808	-2.07897	-1.93649	-1.74998	-1.94648	-2.09812	-2.21858	-2.10443	-1.64468	-1.62605	-1.74416	-1.70963	-1.77622	-2.16592	-2.27237	-2.46685	-2.62483	-2.43558	-2.09872	-1.73851
09N_1EC	-1.70148	-2.00711	-2.4778	-2.60079	-2.41535	-1.71559	-1.88731	-2.01601	-1.84828	-1.89311	-2.25614	-2.54756	-2.54554	-2.34886	-2.23007	-2.13413	-2.10538	-2.16899	-2.37839	-2.15204	-1.84525	-1.74273	-2.05605	-1.68212	-1.73268	-1.80265	-2.24728	-2.31609	-2.36805	-2.16825	-1.98828	-1.85887	-2.28294	-2.11967	-2.13949	-2.49067	-2.75552	-2.44075	-2.10038	-1.65892	-1.51853	-1.75381	-1.89174	-1.82611	-1.71971	-1.91781	-2.26983	-1.82112	-2.18282
10N_1AC	-1.97866	-1.99896	-1.75489	-1.52199	-2.19383	-1.96191	-2.1447	-1.87682	-1.57051	-1.35643	-1.36444	-2.01143	-2.0574	-1.96919	-2.40793	-2.8952	-2.80593	-2.06004	-1.78052	-1.8565	-1.57334	-1.5562	-1.5476	-1.84987	-1.62477	-1.62419	-2.0974	-2.1957	-1.95407	-1.51624	-1.50324	-2.15527	-1.96281	-2.10473	-2.08391	-1.70584	-1.57972	-1.41273	-1.86699	-1.70339	-1.6152	-1.64779	-1.81797	-1.61176	-1.70345	-2.39345	-2.10581	-2.28551	-2.15222
11N_2AC	-2.03548	-1.44307	-1.58379	-1.84362	-1.73515	-1.63218	-1.46158	-1.57973	-1.50992	-1.47196	-1.38217	-1.42	-2.03092	-2.28244	-2.26616	-2.03719	-1.8955	-1.77103	-1.68383	-1.7653	-1.93831	-1.82193	-2.04251	-1.99246	-1.86316	-1.86682	-2.13684	-2.01368	-1.77958	-1.45802	-1.33937	-1.70847	-1.90663	-2.11175	-2.13665	-2.38825	-2.39747	-1.94574	-2.04908	-2.30124	-2.49454	-2.16849	-1.81699	-1.50662	-1.58525	-1.784	-2.26998	-2.41772	-2.01244
13N_3EC	-2.21677	-1.55619	-1.90454	-2.08465	-1.96808	-1.79141	-1.9652	-2.69841	-2.15755	-2.03193	-2.23014	-2.2149	-2.20495	-2.10499	-1.77336	-1.72744	-1.69092	-1.6715	-1.45032	-1.57446	-1.47698	-2.04479	-1.98557	-1.95732	-2.04909	-2.09938	-1.85733	-1.55418	-1.50406	-1.89483	-1.82198	-2.35898	-2.66528	-2.40694	-2.50934	-2.43909	-2.08753	-1.91855	-1.85952	-2.15088	-1.71331	-1.61899	-1.63276	-1.78326	-2.51608	-2.13115	-2.03686	-1.65572	-1.99833
14N_3EC	-2.16654	-2.37042	-1.8907	-1.92695	-2.07879	-2.26332	-1.55442	-1.5574	-1.49368	-1.94714	-1.69284	-2.07681	-1.9821	-2.08332	-1.93164	-2.10887	-2.13575	-1.7728	-1.98128	-1.89477	-2.14464	-1.92175	-1.91141	-2.1051	-2.25844	-2.54515	-2.49087	-2.92863	-3.64692	-2.8783	-2.24144	-1.68316	-1.65111	-1.72783	-1.81236	-1.4959	-1.89087	-1.58919	-1.85325	-2.42725	-1.85692	-2.03019	-2.21084	-2.44023	-2.14887	-2.14104	-2.23326	-1.86615	-1.70828
15N_4AC	-1.64322	-1.93466	-1.98449	-2.06437	-1.9238	-2.20444	-2.57762	-2.47855	-2.2313	-2.17942	-2.01377	-1.7418	-2.00453	-1.87373	-2.14156	-2.11123	-1.61458	-1.3112	-1.06397	-1.96208	-1.85905	-1.57572	-1.61283	-2.29155	-1.44517	-1.49963	-1.94957	-2.12963	-1.65044	-1.64534	-1.87089	-1.90361	-1.84419	-1.63061	-1.51804	-1.96908	-2.38464	-2.61785	-1.4987	-1.53347	-1.61564	-1.85391	-1.58396	-1.9618	-1.90418	-1.78735	-1.95156	-1.91945	-2.72056
17N_1AP	-2.09409	-2.18065	-1.94589	-1.84087	-1.66016	-1.36437	-1.49403	-1.65774	-1.46485	-1.58355	-1.3067	-1.43572	-1.54415	-1.60916	-1.61245	-1.66053	-1.48565	-1.88181	-1.79238	-1.62189	-1.58326	-1.5913	-1.60848	-1.85552	-2.06432	-2.08736	-1.35522	-1.39761	-1.85199	-1.87886	-1.97307	-2.36711	-2.36516	-2.0433	-2.03086	-1.91699	-1.50597	-1.43817	-1.65442	-2.40394	-1.68617	-1.52668	-1.53049	-1.55762	-1.55241	-1.62948	-1.5787	-1.38894	-1.45369
18N_1EP	-2.2465	-1.97329	-2.24526	-2.36256	-2.28043	-2.79682	-2.73484	-2.68841	-1.9735	-1.76543	-2.03679	-2.03326	-1.90647	-2.03471	-1.93226	-2.01492	-1.92399	-1.87734	-1.5823	-1.84535	-1.7192	-1.86268	-2.11275	-1.8719	-2.28522	-2.04217	-1.49405	-1.51919	-1.48613	-1.68466	-1.64045	-1.81598	-2.05612	-2.26225	-2.2268	-2.32261	-2.07832	-2.09686	-1.76286	-2.06234	-2.21145	-2.3201	-2.22475	-2.63074	-2.30645	-1.89438	-1.77264	-2.25719	-2.35737
19N_2AP	-2.03776	-2.09126	-2.11257	-2.17882	-2.18269	-1.51086	-1.46025	-1.68678	-1.80955	-1.75151	-1.87216	-1.62907	-1.42666	-1.47803	-1.40964	-1.50717	-1.42653	-1.87315	-1.58867	-1.39616	-1.28267	-1.15858	-1.2447	-1.34709	-1.37068	-1.27814	-1.61358	-1.59391	-1.6044	-1.36535	-1.74359	-1.66632	-1.70112	-1.67495	-1.6449	-1.78688	-2.22078	-2.29143	-2.32722	-2.01157	-1.82574	-1.43735	-1.66026	-2.67837	-2.77518	-2.3155	-1.45218	-1.31856	-1.79484
20N_2EP	-2.09372	-1.82136	-1.76197	-1.87539	-1.80695	-1.90053	-1.93861	-2.13612	-2.25019	-2.31213	-2.17367	-1.99552	-1.87223	-1.85166	-1.73806	-1.54955	-1.96478	-1.80813	-2.01154	-2.05923	-1.84214	-1.86832	-2.18301	-2.2686	-2.03656	-1.91808	-1.43383	-1.63125	-1.68879	-2.12694	-2.26334	-2.23603	-2.16144	-2.3102	-2.44462	-2.3725	-2.44666	-2.61494	-2.29145	-2.00009	-2.04925	-1.92627	-1.92113	-1.63369	-1.38229	-1.59078	-1.50727	-1.83258	-1.9605
21N_3AP	-1.90664	-1.94749	-2.11928	-1.87648	-1.96523	-1.66633	-1.69997	-1.87726	-2.09017	-1.97589	-2.07407	-1.81569	-1.90074	-1.82954	-2.12678	-1.9707	-2.14221	-2.05832	-2.25971	-1.84849	-1.95719	-1.58655	-1.6069	-1.70583	-1.41056	-1.58272	-2.0171	-2.22396	-2.37246	-2.3895	-1.98348	-2.07061	-2.02301	-2.13346	-2.7319	-2.69735	-2.53877	-2.2248	-1.87081	-1.62882	-2.25812	-2.42553	-2.42375	-2.55982	-2.32082	-2.56396	-2.61863	-2.45719	-2.0779
22N_3EP	-2.02968	-1.85932	-1.99705	-2.08603	-2.37718	-2.11318	-2.02133	-1.64786	-1.84682	-1.80273	-2.09677	-1.88467	-1.75616	-1.80369	-1.87274	-1.76869	-1.37397	-1.28833	-1.38152	-1.40501	-1.66067	-2.23489	-2.24879	-1.91342	-1.53539	-1.83558	-2.1749	-2.34757	-2.24808	-1.99091	-1.99775	-2.22852	-1.8777	-1.86661	-1.92676	-2.01532	-2.24463	-2.03686	-1.70205	-1.35845	-2.01938	-2.06037	-1.69741	-1.57816	-1.92106	-1.99873	-2.2618	-2.02264	-1.9518
23N_4AP	-1.64065	-1.66159	-1.58814	-2.12242	-2.0269	-2.03521	-1.95629	-2.0979	-2.15655	-2.29743	-2.33068	-2.1809	-2.25587	-2.12348	-1.62724	-1.37298	-1.67541	-2.14173	-2.07572	-2.20969	-2.19152	-2.04952	-1.49135	-1.61312	-1.67868	-2.11578	-1.53719	-1.7412	-1.54707	-1.62927	-1.64547	-2.05885	-1.91451	-2.21265	-1.6757	-1.29933	-1.37521	-2.03458	-1.71453	-1.96423	-1.66118	-1.76821	-1.96863	-2.02278	-2.18856	-1.67617	-1.34444	-1.31588	-1.64975
24N_4EP	-1.67648	-1.63184	-1.57257	-1.72078	-1.87926	-1.65494	-1.61736	-1.57659	-1.60016	-2.0615	-2.48637	-2.66769	-2.3018	-1.62364	-1.68026	-1.88854	-2.21882	-1.99035	-1.99709	-2.76505	-2.97642	-2.66575	-2.20866	-2.34927	-2.32304	-2.00623	-1.80259	-1.7993	-1.77456	-1.87112	-2.18798	-2.5273	-2.45372	-1.99582	-2.48729	-2.41259	-2.5796	-2.55685	-2.25466	-2.12771	-2.09624	-1.98131	-2.04497	-2.00467	-1.41711	-1.63701	-1.62446	-2.28541	-2.15168
25N_1AC	-1.80191	-1.9402	-1.89149	-1.6931	-1.93521	-1.99737	-2.02302	-2.0945	-2.44122	-2.88866	-2.45538	-2.47042	-2.2398	-1.91092	-1.9111	-1.83912	-2.24563	-2.51407	-2.4194	-2.25784	-1.69131	-1.58298	-1.46878	-1.83172	-1.71455	-1.71083	-1.76345	-1.92739	-1.72742	-1.4262	-1.36291	-1.41095	-1.76305	-1.67077	-1.76081	-2.44628	-2.28529	-2.25858	-2.44817	-2.17597	-2.0358	-1.93827	-2.07727	-2.27622	-2.02926	-1.86477	-2.09607	-2.03206	-2.37912
27N_2AC	-2.15192	-1.99451	-2.23691	-2.11797	-1.99742	-1.76135	-1.98513	-2.22392	-1.97518	-2.16807	-2.04374	-2.00573	-2.01041	-2.02433	-2.04443	-1.91162	-1.98983	-2.38659	-2.62718	-2.68488	-2.56741	-2.56646	-2.50949	-2.45797	-2.1183	-1.61123	-1.65778	-1.65505	-1.62458	-1.69184	-2.0246	-1.72517	-1.40056	-1.55027	-1.83477	-1.7879	-1.68746	-1.5896	-1.74794	-2.18773	-2.33449	-2.61134	-1.60525	-1.5731	-1.5583	-2.20249	-2.1575	-2.18621	-1.90502
29N_3AC	-2.14637	-1.99846	-2.53672	-2.36244	-2.04836	-2.12593	-1.61269	-1.79806	-1.79157	-2.04529	-2.1485	-2.57126	-2.37174	-2.49238	-2.37759	-2.51847	-2.24584	-1.75904	-1.26915	-1.46408	-1.72163	-2.10369	-2.04619	-2.06493	-2.46358	-2.55776	-1.77622	-1.86279	-2.13395	-2.10564	-2.1842	-2.07157	-2.3003	-2.34443	-1.97267	-1.75791	-1.90969	-2.3925	-2.60701	-2.68663	-2.34389	-2.21463	-2.28954	-2.86153	-2.35435	-2.27214	-1.53501	-1.71564	-1.74216
30N_3EC	-1.57203	-1.66209	-1.70022	-1.99627	-2.25617	-1.74025	-1.56837	-1.32489	-1.47279	-1.68208	-2.07767	-1.6923	-1.71715	-2.21229	-2.02764	-1.98202	-1.82164	-1.96377	-1.96748	-1.72389	-1.77372	-1.84929	-2.05048	-1.8922	-1.71865	-1.72582	-2.00891	-2.21544	-1.97682	-1.93935	-1.81722	-1.83263	-1.92527	-1.5363	-1.78206	-1.88426	-1.81603	-1.68634	-1.38928	-1.5971	-1.95715	-1.94218	-1.89962	-1.7561	-1.82664	-1.88953	-2.18964	-2.01601	-1.91083
32N_4EC	-1.53846	-2.20356	-1.77513	-1.84393	-2.18151	-2.24215	-1.96313	-2.36449	-2.48883	-2.60514	-2.45548	-2.49182	-2.22385	-1.92119	-2.2086	-2.08305	-1.86695	-1.91829	-1.98212	-1.88967	-1.93353	-1.80541	-1.79217	-2.03737	-1.80022	-2.04064	-2.25791	-1.70981	-1.68133	-1.58926	-1.92158	-1.94201	-1.99388	-1.90385	-1.91184	-1.97605	-1.97223	-1.94574	-2.28637	-2.16858	-2.18828	-1.8994	-1.89032	-1.72284	-2.02883	-1.81159	-1.64551	-1.44814	-1.47893
33N_1AP	-2.02754	-2.18102	-2.20551	-2.06875	-2.00864	-2.02476	-2.05209	-2.00175	-2.08896	-2.01852	-2.0961	-2.02055	-1.85122	-2.09355	-1.99876	-2.08538	-1.85285	-1.87063	-1.9871	-2.06708	-2.35991	-2.25018	-2.31754	-2.14845	-1.98114	-2.15262	-2.08842	-1.5363	-1.54762	-1.84348	-1.65113	-1.74833	-1.86959	-1.70918	-1.72315	-1.80499	-1.89085	-1.96968	-2.11496	-1.9021	-1.84865	-1.68945	-1.88285	-2.00102	-1.82159	-1.73343	-1.86768	-1.71772	-1.89583
34N_1EP	-2.10007	-2.00655	-2.16773	-2.18994	-1.83001	-1.83835	-1.51831	-2.17083	-2.14329	-1.95495	-1.54555	-1.81272	-1.85579	-1.94121	-1.53114	-1.37457	-1.73252	-1.87178	-1.67141	-1.68348	-1.43867	-1.40887	-1.65111	-1.97359	-2.11042	-2.087	-1.96512	-1.82372	-2.06874	-2.12131	-2.11839	-1.81259	-1.87217	-1.91932	-2.32207	-2.3742	-2.0587	-1.9038	-1.90823	-1.97167	-2.09608	-2.23115	-2.13075	-2.28724	-2.3089	-2.32328	-1.96556	-1.87558	-1.71135
35N_2AP	-1.72911	-1.43163	-1.40147	-1.34292	-1.5309	-1.11828	-1.26309	-2.16812	-2.30432	-1.93328	-1.91242	-2.25898	-2.06853	-2.05135	-2.05233	-1.62866	-1.74471	-1.90568	-1.51956	-1.65711	-1.83819	-2.39486	-2.71294	-2.74225	-1.76158	-1.80109	-1.79231	-1.92723	-1.83171	-2.33999	-2.07957	-2.08233	-1.63147	-1.65967	-1.78165	-2.18794	-2.6756	-2.00588	-2.12763	-1.73834	-1.6337	-1.6522	-1.76785	-1.47995	-1.57994	-1.69227	-1.69087	-2.31651	-2.19293
36N_2AP	-1.81822	-1.58594	-1.53857	-1.05064	-1.23141	-1.24695	-2.03844	-1.80169	-2.14165	-2.18149	-2.26979	-2.07357	-2.27398	-2.1606	-2.11726	-2.3	-2.53103	-2.45596	-2.07975	-1.98536	-2.19547	-2.25561	-2.34501	-2.51687	-1.92837	-1.58788	-1.63887	-2.25019	-2.41733	-1.41764	-1.61743	-1.85618	-1.80579	-1.77561	-1.69289	-1.69699	-2.33797	-2.2563	-2.27817	-2.83149	-2.84487	-2.79479	-2.11834	-2.16291	-2.43205	-2.03786	-1.95142	-2.07641	-2.00653
37N_3AP	-2.0612	-2.12511	-2.1374	-2.15235	-2.07327	-2.41136	-2.09311	-1.96702	-1.89427	-2.27629	-2.1493	-1.9145	-1.81959	-1.98778	-1.82131	-1.34217	-1.2986	-1.4774	-1.41862	-2.0899	-1.78304	-1.89863	-2.26821	-1.46933	-1.81672	-1.81303	-1.9708	-2.46992	-2.24858	-2.21498	-1.67216	-1.98786	-2.18251	-2.25016	-1.98831	-1.92502	-1.6396	-1.52141	-1.48838	-1.60039	-2.13061	-1.96484	-1.8016	-1.81551	-1.9116	-2.03129	-1.95332	-2.00182	-1.92667
39N_4AP	-2.35534	-2.13457	-2.2621	-2.08173	-2.1871	-1.55741	-1.44043	-1.43806	-1.1194	-1.23969	-1.68345	-1.75626	-1.74713	-1.71941	-1.90419	-1.46137	-1.9007	-2.07318	-2.31446	-2.02148	-2.04243	-2.33064	-2.10275	-2.19559	-2.28802	-2.24849	-1.92284	-1.86775	-1.74926	-1.65085	-2.0969	-1.78791	-1.43838	-1.54593	-1.61267	-1.49254	-1.27944	-1.26919	-1.2066	-1.34099	-1.50268	-1.95408	-1.5588	-1.54798	-1.66544	-1.70105	-1.78463	-1.73261	-1.77712
41N_1AC	-1.61847	-1.77094	-1.78704	-1.72079	-2.0182	-1.52231	-1.69153	-2.01944	-2.30594	-2.33715	-2.46966	-2.30603	-2.24546	-1.79155	-1.89382	-2.43633	-2.35751	-1.89893	-1.79691	-1.76867	-1.97402	-1.17014	-1.14937	-1.31038	-1.65376	-1.41734	-1.6008	-1.80184	-2.26069	-2.29527	-2.11849	-2.2129	-2.26328	-2.1016	-1.80777	-2.32584	-2.26531	-2.25042	-1.64281	-2.03724	-2.03612	-2.36631	-1.69706	-1.55467	-1.59265	-1.62401	-1.99021	-1.62617	-1.75933
42N_1EC	-2.32238	-1.97109	-2.00129	-1.66263	-2.01276	-2.09961	-2.37935	-2.17945	-2.07655	-2.39132	-2.31106	-2.19899	-2.06097	-1.843	-1.87128	-1.87741	-1.61494	-1.42143	-1.63692	-1.58912	-1.81802	-1.66558	-1.55158	-2.0044	-2.28258	-2.28394	-2.19216	-2.47708	-2.11772	-1.98996	-1.96395	-1.98469	-2.2157	-2.13874	-2.038	-2.09935	-2.11871	-2.11872	-2.74001	-2.4722	-2.07604	-2.05678	-2.15981	-1.62725	-1.53584	-2.11009	-2.13641	-2.50877	-1.59416
43N_2AC	-2.47277	-2.33612	-1.96967	-1.81116	-1.83284	-1.91621	-1.85883	-1.8489	-1.48068	-1.36842	-1.83964	-1.83988	-2.1967	-2.17327	-2.32293	-2.1191	-2.13324	-1.73384	-1.76837	-1.75424	-1.72325	-1.45121	-1.61492	-1.62562	-1.6219	-2.07378	-1.83231	-1.80567	-1.73461	-2.24005	-2.07024	-2.23185	-2.46693	-2.67711	-1.5531	-1.48178	-1.36093	-1.55747	-1.07823	-1.30047	-1.77183	-2.06266	-2.19633	-2.21205	-2.42704	-1.56441	-1.50405	-2.00937	-2.17924
44N_2EC	-1.84319	-2.00378	-1.92613	-2.01691	-2.03471	-2.01453	-1.85118	-1.75403	-1.97564	-1.89992	-1.88336	-1.91042	-2.02126	-2.00731	-1.82326	-2.33259	-2.8562	-2.73841	-2.21029	-1.92293	-1.94037	-1.7377	-2.07391	-1.74068	-1.84878	-1.53976	-1.44988	-1.8742	-1.78788	-1.65504	-1.47089	-1.5418	-1.29503	-1.79744	-2.24413	-2.03755	-1.71503	-1.63434	-1.59617	-1.73639	-1.87756	-1.74682	-2.29095	-2.1254	-1.37921	-1.71653	-2.22697	-2.25692	-2.14409
45N_3AC	-2.65565	-1.97942	-2.06273	-1.7179	-2.03369	-2.04613	-1.96838	-1.87689	-1.76953	-1.83202	-1.75563	-1.89559	-2.45278	-2.18001	-2.07662	-1.17043	-1.16182	-1.29551	-2.11727	-1.45999	-1.6216	-1.69616	-1.55923	-1.48843	-1.68035	-1.70274	-1.90898	-1.89791	-2.28599	-2.3864	-2.19902	-2.14656	-2.2871	-2.66039	-2.35572	-2.232	-2.17824	-1.74224	-1.7139	-1.96206	-2.2114	-2.15133	-1.9995	-2.01944	-2.19471	-1.85161	-1.99127	-1.93378	-2.17376
46N_3EC	-2.10728	-2.0186	-1.86442	-1.82473	-1.90008	-2.0554	-2.35515	-2.28123	-2.29716	-2.13707	-1.86196	-1.85352	-1.8691	-2.14206	-2.15952	-1.16064	-1.29194	-1.59722	-2.31796	-2.43525	-2.70899	-2.45294	-2.63214	-2.44118	-2.51853	-2.44137	-2.60957	-2.35551	-2.17328	-2.1724	-1.75826	-1.54148	-1.22001	-1.37357	-1.53623	-2.23369	-2.15286	-2.02538	-2.00797	-2.06325	-1.86333	-2.17595	-2.22318	-2.00689	-1.69898	-2.067	-1.69767	-1.87168	-1.54052
49N_1AP	-2.2383	-2.69369	-2.77202	-2.61628	-2.69131	-3.11035	-2.75513	-2.16415	-2.02849	-2.12994	-1.81603	-1.62958	-2.02822	-2.41375	-2.38573	-2.30925	-2.58655	-2.07802	-1.88837	-1.40409	-1.57951	-2.00187	-2.52282	-2.25779	-2.02619	-2.52681	-2.46198	-2.23018	-2.14057	-1.95442	-1.9176	-2.22584	-1.77467	-1.86883	-1.93409	-2.18623	-2.29734	-2.44246	-2.31285	-2.08272	-2.24325	-1.76715	-1.69268	-1.96823	-2.52224	-2.2547	-1.9454	-2.03169	-2.03977
50N_1EP	-2.33096	-2.38685	-1.8698	-1.84575	-1.92178	-2.14446	-1.92782	-2.2085	-2.26988	-2.04112	-1.79276	-1.83481	-1.84877	-1.74504	-1.55852	-1.4282	-1.08935	-1.13919	-1.40717	-1.61357	-1.8506	-2.07665	-2.36047	-2.63662	-2.62741	-2.58171	-1.75435	-1.54764	-1.75609	-1.75069	-1.89699	-1.87621	-1.95665	-1.69005	-1.50371	-1.39875	-1.36946	-1.07339	-1.4341	-1.61662	-1.98681	-1.93177	-1.91112	-1.55362	-1.46239	-1.83021	-1.9329	-1.75584	-1.47529
51N_2AP	-1.90836	-1.66121	-1.81331	-1.59805	-1.85087	-1.77705	-1.86009	-2.20021	-2.24988	-1.89427	-1.34544	-1.40844	-1.9501	-1.50105	-1.30712	-1.47057	-2.32626	-2.1705	-1.95146	-1.98516	-2.02164	-2.2682	-2.05346	-1.7337	-1.53248	-1.64696	-2.20468	-1.94559	-1.73985	-1.7414	-1.9178	-2.02842	-2.60445	-2.32554	-2.1461	-1.77582	-2.09414	-1.93344	-2.09637	-1.79409	-1.77963	-1.56645	-1.76981	-1.76821	-2.15812	-1.79556	-1.55994	-1.34877	-1.46862
52N_2EP	-1.7023	-1.51742	-1.49234	-1.53169	-2.15095	-2.22883	-1.96732	-1.85232	-1.71633	-1.7808	-1.76961	-1.94239	-1.66336	-1.81938	-1.78478	-2.11449	-2.11211	-2.16757	-2.16708	-2.01949	-1.983	-1.50274	-1.58638	-1.56579	-1.56026	-1.91008	-1.94186	-2.15353	-2.17174	-2.04009	-2.12504	-2.85476	-2.7539	-2.09815	-1.84985	-2.00917	-1.54786	-1.74686	-1.7588	-2.2232	-1.93134	-2.25188	-2.28898	-2.03438	-1.95868	-1.58948	-1.38377	-1.47396	-1.67116
53N_3AP	-1.75668	-1.95768	-1.83753	-1.75581	-1.95862	-1.95159	-1.99238	-2.00724	-2.14006	-2.06621	-2.08902	-2.08678	-2.17874	-2.29635	-1.64101	-1.69124	-1.80531	-1.77863	-1.81357	-1.77906	-2.19136	-2.20961	-1.71771	-1.68703	-2.13545	-2.53664	-2.20447	-2.11088	-1.81394	-1.9057	-2.06863	-1.86952	-2.02996	-2.49422	-2.58062	-1.97132	-1.77126	-1.49297	-1.2445	-1.67637	-2.38915	-2.30147	-1.97401	-1.8007	-2.10166	-2.08191	-1.87343	-1.68592	-1.70186
54N_3EP	-1.74239	-2.07879	-2.2333	-1.83957	-1.4604	-1.78703	-1.92139	-1.48619	-1.52501	-1.52586	-1.67462	-1.76472	-1.6231	-1.78957	-1.59762	-1.48451	-1.64613	-1.6396	-1.74431	-1.81248	-1.76022	-1.72431	-1.52953	-1.73509	-2.08904	-2.1272	-1.8931	-1.69569	-1.82042	-1.99266	-1.91512	-1.60685	-2.10125	-2.09525	-1.87762	-1.73548	-1.47841	-1.4995	-1.55622	-1.47019	-1.44574	-1.42433	-1.54877	-1.91171	-1.87647	-2.00081	-1.86754	-1.99221	-1.78874
55N_4AP	-1.70412	-1.47846	-1.70937	-1.47725	-1.50689	-1.66274	-1.70913	-1.61642	-1.6105	-1.50667	-1.35509	-1.90513	-1.95808	-2.11277	-1.89695	-1.60752	-1.53909	-1.59446	-1.48976	-1.4361	-1.48761	-1.41035	-1.43574	-1.46996	-1.49378	-1.61774	-1.29201	-1.35463	-1.54802	-1.84284	-1.7188	-1.42317	-1.30802	-1.54061	-1.50338	-1.61058	-1.52526	-1.5638	-1.53427	-1.34186	-1.38223	-1.41972	-2.42955	-2.27225	-2.19899	-1.81985	-1.31846	-1.63801	-1.67456
56N_4EP	-1.97248	-2.20847	-2.10917	-2.20899	-2.10633	-1.81556	-1.7179	-2.18042	-2.31526	-2.31277	-1.78828	-1.88295	-1.94444	-2.02386	-2.22468	-2.04402	-2.06212	-2.00507	-2.28943	-2.28527	-2.11222	-2.05901	-1.53397	-1.96533	-2.23699	-2.74581	-2.47607	-2.35119	-2.57147	-2.36671	-2.08177	-1.82714	-1.71925	-1.90076	-1.66614	-1.80848	-1.9754	-2.51856	-2.05766	-1.82449	-1.75097	-1.46576	-1.38347	-1.5779	-1.5144	-1.59925	-1.9846	-2.11322	-2.09658
58N_1EC	-2.11023	-2.16739	-1.88079	-1.95288	-2.14847	-2.2269	-2.02875	-1.73975	-1.29956	-1.30658	-1.59542	-1.68966	-1.88969	-1.73698	-1.8496	-2.13577	-2.15928	-1.75011	-1.85577	-1.88245	-1.5086	-1.42312	-1.56398	-1.87551	-1.81131	-1.37179	-1.45043	-1.86538	-1.63535	-1.85536	-1.73445	-1.98127	-2.01152	-2.06634	-1.84856	-1.63643	-1.55925	-1.79944	-1.62826	-1.73429	-1.52938	-1.55901	-1.63324	-1.74572	-1.75255	-2.10512	-2.33001	-2.33019	-2.06994
60N_2EC	-1.78552	-2.26296	-2.50441	-2.38545	-2.24383	-2.71606	-2.6224	-2.19164	-2.2039	-1.99811	-1.97108	-1.86545	-2.05947	-1.75262	-1.92162	-1.89654	-2.08622	-1.88683	-1.68484	-1.78215	-1.99327	-2.04197	-2.52407	-2.15664	-1.75865	-1.39207	-1.35531	-1.42714	-1.6728	-1.86753	-2.13984	-2.28304	-2.09712	-1.5786	-1.5624	-1.76803	-1.83687	-1.90108	-1.71444	-1.60447	-1.86521	-1.99176	-2.16642	-2.24217	-2.07789	-1.92811	-1.71029	-1.69142	-1.5519
61N_3AC	-1.82587	-1.7848	-2.43659	-2.45338	-2.37822	-2.01485	-1.6987	-1.64679	-1.60346	-2.20915	-2.10185	-2.32404	-1.8361	-1.29253	-1.53177	-1.79227	-1.75049	-1.72562	-1.73278	-1.69375	-1.92279	-1.93653	-1.70851	-2.14948	-2.00147	-1.9567	-2.05232	-2.18108	-2.14745	-2.17584	-1.87332	-1.57234	-1.55368	-1.58234	-1.9045	-1.97314	-1.81143	-1.72114	-1.89513	-1.73941	-1.52326	-1.61245	-1.92606	-2.16224	-2.05389	-2.19996	-1.91344	-1.9291	-2.2679
63N_4AC	-2.3688	-2.34868	-2.25455	-1.92059	-1.67179	-1.70175	-1.80579	-1.96102	-2.01982	-1.78243	-1.7916	-1.94526	-2.0964	-2.23381	-2.27754	-2.22589	-2.6647	-2.06013	-2.1152	-2.26627	-2.20101	-2.16589	-2.02357	-2.19946	-2.27828	-2.1071	-1.89417	-2.05165	-1.3877	-1.76127	-1.95209	-2.1316	-1.75306	-1.7563	-2.0206	-1.99275	-1.69154	-1.63436	-2.25648	-2.2638	-2.10852	-2.07133	-2.08828	-2.03505	-2.00482	-2.17999	-2.34773	-2.43645	-2.12932
64N_4EC	-1.90422	-1.88476	-1.83934	-1.8035	-1.6682	-1.99667	-1.62357	-2.30146	-2.50368	-1.9801	-2.03328	-1.54891	-1.88374	-2.34668	-1.68338	-1.3553	-1.41534	-1.62481	-1.56292	-1.59341	-1.70857	-1.93668	-1.85515	-2.18306	-1.49932	-1.90527	-1.88529	-2.23933	-2.09045	-1.88435	-2.00995	-2.11511	-2.1485	-2.1012	-2.01834	-1.91425	-1.81878	-1.80219	-1.79093	-1.80629	-2.02334	-1.8541	-2.253	-2.18913	-1.53636	-1.45023	-1.75163	-1.9144	-1.94267
65N_1AP	-1.88431	-1.96535	-1.66811	-1.79242	-1.48798	-1.4711	-1.53011	-1.43198	-1.52619	-1.4761	-1.68561	-2.07752	-2.16508	-1.49694	-1.47112	-1.43256	-1.96529	-1.79828	-1.5729	-1.41166	-1.52752	-1.87724	-1.95322	-1.94595	-2.06474	-1.48005	-1.5006	-1.66837	-1.50944	-1.50368	-1.21928	-1.174	-1.19921	-1.82147	-1.64769	-1.0705	-1.09209	-1.36406	-1.84599	-1.41892	-1.41455	-1.32021	-1.39705	-1.74586	-1.50987	-1.48082	-1.43885	-1.63265	-1.5289
66N_1EP	-2.06531	-1.85789	-2.27335	-1.92459	-1.95113	-2.12593	-2.31972	-1.85841	-2.10481	-2.03161	-1.9707	-1.85823	-1.84931	-1.83233	-2.1953	-1.79415	-1.83714	-1.89915	-1.6879	-1.67427	-1.85089	-2.03459	-1.52294	-1.65357	-1.76582	-1.64964	-1.66989	-1.70094	-1.63215	-1.81554	-1.60558	-1.97549	-1.85736	-1.95009	-1.90956	-1.79398	-1.74157	-1.81122	-1.69489	-1.94286	-2.04816	-2.24379	-1.78186	-1.5095	-1.63188	-1.9441	-1.91282	-1.87318	-1.74414
67N_2AP	-2.31441	-2.5234	-2.80741	-2.77282	-2.44072	-1.94704	-1.89516	-2.23592	-2.44243	-2.61463	-2.29705	-2.04396	-2.02623	-1.51997	-1.61786	-1.61464	-2.09828	-2.14626	-1.92101	-1.5307	-1.79322	-1.77183	-1.91609	-1.79691	-1.66362	-1.82958	-2.02554	-2.10448	-1.96744	-1.95503	-1.99908	-2.2486	-2.02325	-2.17666	-2.24819	-2.06252	-1.63717	-1.65119	-2.10336	-2.3275	-2.57439	-3.07127	-2.91548	-2.70072	-2.47125	-2.416	-1.90084	-1.79078	-1.56361
68N_2EP	-1.68767	-2.02828	-1.84525	-1.66174	-1.49434	-1.34939	-1.57047	-1.66409	-1.663	-1.74254	-1.4446	-2.04868	-2.0341	-1.29947	-1.27804	-1.48565	-2.09177	-1.7515	-1.77775	-2.05794	-2.05275	-1.73828	-1.55256	-1.83351	-1.96477	-2.046	-2.11609	-2.31609	-2.38682	-2.37682	-1.66607	-1.69849	-1.76925	-2.08294	-2.24176	-2.16501	-2.25064	-1.43153	-1.47971	-1.78654	-2.01577	-1.96283	-2.22088	-2.10858	-2.11785	-2.35718	-2.62279	-2.45867	-1.71598
70N_3EP	-1.90219	-1.44508	-1.26851	-1.72575	-1.98452	-1.78048	-1.52338	-1.42384	-1.64315	-1.70804	-2.33335	-2.05693	-1.5094	-1.51128	-1.54916	-2.14753	-1.91318	-1.72485	-1.65729	-1.43104	-1.61288	-1.59749	-1.67306	-1.37132	-1.34478	-1.43471	-1.74427	-1.85136	-1.97059	-1.73638	-1.64045	-1.48923	-1.80654	-1.68774	-1.60419	-1.44226	-1.57036	-1.60652	-2.19137	-2.05866	-1.61811	-1.91458	-1.58392	-1.56103	-1.41248	-1.61759	-2.03332	-1.83966	-1.48578
72N_4EP	-1.92194	-2.18138	-2.15268	-1.97265	-1.99911	-2.0634	-2.14408	-1.56797	-1.69046	-1.99134	-1.95414	-1.93146	-1.85162	-2.07645	-2.29146	-1.71993	-1.84093	-2.08698	-1.9996	-2.12863	-2.34693	-2.04984	-1.42293	-1.67979	-2.30308	-2.36898	-1.82382	-1.81793	-1.73192	-1.9928	-2.46935	-2.10015	-1.89589	-1.87674	-1.91902	-1.71486	-2.32504	-2.51848	-2.67045	-2.20342	-2.15405	-2.39158	-2.06831	-2.43527	-2.36802	-2.54428	-2.05834	-2.20782	-2.11923
73N_1AC	-2.24125	-2.41727	-2.19994	-2.39768	-2.69414	-2.76181	-2.13019	-2.10781	-2.22165	-2.07162	-2.51197	-2.48797	-2.18463	-1.89517	-1.90651	-2.20976	-2.39381	-2.12762	-1.77696	-1.8566	-1.60328	-1.62262	-2.23579	-1.98858	-1.9899	-2.18786	-2.33349	-2.61451	-2.35203	-2.34817	-2.61281	-1.92102	-1.79285	-1.68601	-1.7965	-1.81009	-1.97718	-2.31522	-2.63691	-2.65608	-2.69213	-2.65207	-2.47783	-2.21321	-2.29967	-2.28554	-2.54827	-1.63503	-1.46872
74N_1EC	-1.87138	-1.54086	-1.85844	-1.74453	-1.69099	-1.98243	-1.62713	-1.7277	-1.85706	-1.82634	-1.57899	-2.0113	-1.81255	-2.01114	-2.11782	-2.04688	-1.65188	-1.66966	-1.63331	-1.60843	-1.99448	-2.17911	-1.83899	-1.7987	-1.5888	-1.52668	-1.37814	-1.58776	-1.43333	-1.56448	-1.51644	-1.87265	-2.01994	-1.99087	-1.9857	-2.02425	-2.12918	-2.23563	-2.4379	-2.22018	-2.54642	-2.35052	-2.64584	-2.53379	-2.47978	-2.65807	-2.69188	-2.28447	-1.65808
75N_2AC	-2.04718	-1.60543	-1.79581	-1.72123	-1.74443	-1.63425	-1.52808	-1.51541	-1.91247	-2.13139	-2.3073	-2.7148	-3.01965	-2.69246	-1.73059	-1.75169	-1.5326	-1.39039	-1.50949	-1.53747	-1.53245	-1.67513	-2.13836	-1.87838	-1.93635	-1.89523	-1.71762	-1.77616	-1.32084	-2.15633	-1.98821	-1.5184	-1.18574	-0.991083	-1.85551	-2.08206	-2.32981	-2.02281	-1.42998	-1.51822	-1.46928	-2.19286	-2.03269	-2.07327	-2.23904	-2.40918	-2.64986	-1.85758	-1.7218
76N_3EC	-1.642	-2.2124	-2.14303	-2.06334	-2.28423	-2.39357	-2.525	-1.88971	-1.73248	-1.72476	-1.79055	-1.72668	-1.80494	-1.47669	-1.32507	-1.57714	-2.13663	-2.00658	-2.03725	-1.83853	-2.08691	-2.19508	-2.30001	-1.9721	-1.906	-1.42949	-1.13201	-0.931112	-1.47214	-1.63849	-1.5997	-1.90657	-1.57264	-1.52969	-1.5379	-1.59354	-1.76128	-1.72369	-1.66095	-1.72946	-1.68683	-1.77808	-2.16498	-2.06046	-1.74969	-1.84689	-1.6508	-1.72427	-1.64275
77N_3AC	-2.18594	-1.79163	-1.64556	-1.48922	-1.5944	-1.57121	-1.81537	-1.50635	-1.41834	-1.55286	-1.95164	-2.10239	-1.75799	-2.23798	-1.91116	-1.93159	-1.80305	-2.05637	-2.2951	-2.26298	-2.05471	-2.20236	-2.14334	-2.09623	-1.83334	-2.04445	-1.81727	-2.01466	-1.98953	-1.6838	-1.65513	-1.45447	-1.87767	-1.98375	-2.57323	-1.53996	-1.70385	-1.80759	-1.9525	-1.58778	-1.47749	-2.05339	-2.08954	-1.95579	-1.96159	-1.80505	-1.98803	-2.24162	-2.93005
79N_4AC	-1.75514	-1.71964	-1.72993	-1.87259	-1.49129	-1.48793	-1.5175	-1.59073	-1.64338	-1.76727	-1.72235	-1.68865	-1.8774	-2.15299	-2.35159	-1.68182	-1.58239	-1.57603	-2.00734	-1.92694	-1.67316	-1.55924	-1.83482	-1.66761	-1.66919	-1.78352	-1.96114	-1.99805	-2.3589	-2.27378	-2.17393	-1.92885	-1.73281	-1.62869	-1.58885	-1.71185	-1.8174	-0.924317	-0.984147	-1.1086	-1.85642	-1.93248	-1.65223	-1.65094	-1.53305	-1.57288	-1.58627	-1.36293	-1.30959
80N_4EC	-2.90448	-2.83239	-2.41762	-2.05653	-1.90647	-1.71591	-1.70124	-1.40605	-1.49388	-1.52929	-1.72799	-1.78112	-1.59139	-1.84327	-1.85254	-1.92416	-1.86776	-1.68236	-1.70496	-1.52849	-1.43926	-1.56192	-1.81941	-1.81518	-1.83302	-1.39707	-1.30644	-1.32632	-1.31645	-1.36403	-1.77951	-1.39473	-1.53656	-1.55049	-1.69754	-1.78864	-1.42944	-1.37248	-1.23307	-1.41655	-1.42745	-1.45824	-1.72514	-1.41036	-1.40685	-1.61929	-1.96831	-1.90383	-1.64853
83N_2EC	-1.52521	-2.01568	-2.25283	-2.11397	-1.75191	-1.73703	-1.55049	-1.6758	-1.89009	-1.92213	-1.96923	-2.23079	-2.10866	-1.74836	-1.46454	-1.40823	-1.16353	-1.29876	-1.83905	-2.09178	-1.92391	-1.8341	-1.65575	-1.53762	-1.32225	-1.42065	-1.68161	-1.67184	-1.69442	-1.72917	-1.67216	-1.89948	-2.4252	-2.3348	-2.55304	-1.62353	-1.57374	-1.62186	-1.58106	-1.7617	-1.67136	-1.61825	-1.65494	-1.20466	-1.27819	-1.19556	-1.3237	-1.66262	-1.80336
84N_4EP	-1.47499	-1.53025	-1.61868	-1.59665	-1.85452	-1.81415	-1.80718	-1.64956	-1.60206	-1.57805	-1.97464	-1.58481	-1.6926	-2.03435	-2.47089	-2.47632	-1.47442	-1.16575	-1.46265	-1.76665	-1.62672	-1.45294	-1.56793	-1.86386	-1.89473	-1.48885	-1.91904	-2.19827	-2.0993	-1.94346	-1.75177	-1.64775	-1.82584	-1.73357	-1.85913	-1.76586	-1.88769	-1.77917	-1.93197	-1.86132	-1.44973	-1.54278	-1.33457	-1.38547	-1.57982	-1.88891	-1.88632	-1.64844	-1.44969
[truncated: 8 more columns]

## Sheet: window_mean
Subjects	W1	W2	W3	W4	W5	W6	W7	W8	W9	W10	W11	W12	W13	W14	W15	W16	W17	W18	W19	W20	W21	W22	W23	W24	W25	W26	W27	W28	W29	W30	W31	W32	W33	W34	W35	W36	W37	W38	W39	W40	W41	W42	W43	W44	W45	W46	W47	W48	W49
01N_1AP	0.54765	0.572538	0.576206	0.576144	0.59305	0.615369	0.634681	0.659119	0.682775	0.673425	0.637006	0.61005	0.57095	0.502537	0.472794	0.487619	0.489094	0.495069	0.526244	0.551419	0.56185	0.560644	0.556144	0.576519	0.589981	0.595619	0.607975	0.628138	0.631806	0.63975	0.655475	0.652781	0.650969	0.6483	0.644369	0.636081	0.67125	0.703775	0.737413	0.723025	0.703294	0.674075	0.653275	0.629	0.636725	0.667144	0.694419	0.706469	0.71465
02N_1EP	0.739826	0.787428	0.816755	0.798169	0.783703	0.783913	0.701204	0.595057	0.518673	0.440325	0.357977	0.339066	0.341066	0.352833	0.349661	0.3447	0.342426	0.351497	0.347483	0.353973	0.358211	0.344847	0.34022	0.349703	0.357478	0.359185	0.375455	0.369899	0.358009	0.343172	0.343982	0.33633	0.333318	0.331551	0.340842	0.341844	0.343977	0.351529	0.365524	0.364439	0.362467	0.360934	0.365217	0.357931	0.354293	0.359927	0.357904	0.352819	0.352883
03N_2AP	0.471148	0.477348	0.469696	0.4574	0.452511	0.429052	0.39583	0.3738	0.374259	0.3668	0.357178	0.35943	0.35337	0.340141	0.317681	0.29077	0.2846	0.295681	0.296393	0.309889	0.344719	0.368696	0.367081	0.356274	0.325156	0.289926	0.244659	0.223644	0.2482	0.301126	0.348193	0.390556	0.442141	0.447378	0.460822	0.499637	0.541874	0.545444	0.546696	0.533911	0.489763	0.435089	0.404926	0.376289	0.341341	0.336985	0.344585	0.33697	0.367348
04N_2EP	0.609032	0.600379	0.576927	0.552815	0.543887	0.543839	0.546718	0.558919	0.570097	0.575726	0.569056	0.567177	0.570944	0.573476	0.572887	0.577444	0.574226	0.578476	0.583613	0.592145	0.604226	0.61246	0.616371	0.62471	0.625137	0.624944	0.630105	0.626218	0.613863	0.602613	0.59125	0.5825	0.581339	0.579847	0.576645	0.57196	0.563218	0.563581	0.567444	0.571798	0.578516	0.588887	0.584718	0.577476	0.575306	0.560766	0.55596	0.56371	0.563919
05N_3AP	0.292657	0.311636	0.319857	0.32964	0.342586	0.337034	0.311315	0.306107	0.322436	0.343541	0.357628	0.378709	0.385477	0.382851	0.371636	0.367089	0.36623	0.358329	0.343929	0.341042	0.340158	0.338772	0.344602	0.348848	0.333327	0.315905	0.309014	0.305711	0.302511	0.309667	0.316812	0.332756	0.352321	0.362408	0.379857	0.376162	0.333549	0.287952	0.257719	0.228345	0.222721	0.220539	0.219861	0.240448	0.255537	0.265687	0.294891	0.336095	0.346349
06N_3EP	0.100668	0.0972727	0.103296	0.103059	0.112625	0.116743	0.117715	0.109304	0.0961265	0.0835375	0.0750237	0.0762411	0.0827549	0.0932569	0.0955889	0.0960395	0.0964941	0.0916759	0.0890553	0.0907628	0.0925692	0.0938182	0.0880711	0.0859091	0.0800237	0.0764348	0.0744585	0.0825099	0.0885217	0.0981107	0.104261	0.103447	0.107	0.115747	0.135186	0.160905	0.183166	0.178945	0.163423	0.138593	0.111664	0.0911976	0.0869091	0.0946245	0.100862	0.0952213	0.0948814	0.0982134	0.0942253
07N_4AP	0.757425	0.764637	0.775238	0.784062	0.793367	0.785982	0.78008	0.765163	0.759831	0.732156	0.718886	0.711323	0.716374	0.703065	0.711461	0.711479	0.711514	0.695105	0.699955	0.686539	0.682463	0.692396	0.703287	0.727033	0.769488	0.804361	0.805786	0.81278	0.804396	0.80816	0.808	0.811581	0.814445	0.819122	0.798557	0.785884	0.791733	0.787706	0.784775	0.791684	0.793523	0.791581	0.791644	0.781439	0.777448	0.778895	0.770276	0.755653	0.737376
08N_4EP	0.498377	0.510773	0.508367	0.522657	0.49686	0.501188	0.488357	0.46999	0.465903	0.494454	0.491932	0.477507	0.47601	0.454667	0.425923	0.400203	0.398077	0.404242	0.400628	0.421053	0.467903	0.510048	0.512541	0.531778	0.524783	0.490126	0.45171	0.445237	0.445778	0.448928	0.452628	0.457053	0.451295	0.410396	0.403237	0.411923	0.410367	0.397227	0.421913	0.428251	0.449932	0.464473	0.467295	0.45857	0.473778	0.467884	0.484966	0.55513	0.594048
09N_1EC	0.390715	0.380285	0.364238	0.359415	0.352523	0.367123	0.384746	0.4046	0.431362	0.443715	0.430723	0.420846	0.399323	0.366392	0.350538	0.337008	0.329869	0.3351	0.337992	0.343308	0.345708	0.344608	0.332438	0.330346	0.350692	0.352123	0.342362	0.338146	0.321785	0.285092	0.280608	0.283062	0.289738	0.2874	0.267762	0.256346	0.244054	0.239923	0.238777	0.261823	0.281385	0.298869	0.313231	0.330654	0.3211	0.304531	0.372208	0.410831	0.418846
10N_1AC	0.503769	0.478382	0.488629	0.515498	0.554924	0.599745	0.635052	0.637825	0.634685	0.647657	0.63804	0.636287	0.640343	0.58549	0.556709	0.578574	0.595044	0.620685	0.707602	0.740757	0.75549	0.773155	0.795801	0.782629	0.793203	0.780645	0.768231	0.737873	0.726454	0.704287	0.691984	0.661625	0.626725	0.601896	0.579299	0.578414	0.59761	0.623681	0.642183	0.664502	0.673028	0.678223	0.691562	0.711865	0.724422	0.732518	0.742406	0.749968	0.745076
11N_2AC	0.611725	0.582533	0.54494	0.533148	0.537742	0.56111	0.571489	0.578264	0.572143	0.573626	0.576995	0.586324	0.60578	0.624374	0.631764	0.632505	0.624929	0.622181	0.619478	0.616775	0.619808	0.611824	0.606418	0.600225	0.599654	0.577121	0.567753	0.562643	0.571775	0.582148	0.63178	0.672357	0.698769	0.701269	0.708764	0.705813	0.71606	0.710868	0.724478	0.719923	0.706429	0.691104	0.684874	0.675126	0.684654	0.684907	0.683258	0.69367	0.69822
13N_3EC	0.455534	0.445617	0.438218	0.445583	0.451796	0.451544	0.461917	0.469306	0.477044	0.480044	0.475209	0.47901	0.506733	0.538466	0.566223	0.624413	0.671087	0.683141	0.697733	0.718388	0.694447	0.673393	0.659874	0.642073	0.614529	0.615272	0.599791	0.599374	0.597782	0.617641	0.640223	0.674126	0.699592	0.72265	0.731684	0.721058	0.714922	0.703034	0.691301	0.689612	0.696597	0.697228	0.672316	0.621956	0.564476	0.511427	0.476126	0.490981	0.540112
14N_3EC	0.185826	0.185908	0.188734	0.189571	0.188418	0.205266	0.210783	0.208174	0.212076	0.223522	0.214332	0.210668	0.202201	0.203783	0.201174	0.195859	0.19006	0.196255	0.193723	0.189864	0.202429	0.215179	0.226598	0.228668	0.2525	0.253538	0.237359	0.226043	0.220027	0.189179	0.166842	0.188353	0.225918	0.246886	0.268424	0.288929	0.278712	0.250728	0.22913	0.192505	0.176054	0.16619	0.159864	0.173495	0.219935	0.267397	0.33338	0.391571	0.484908
15N_4AC	0.609311	0.609581	0.615015	0.620614	0.614174	0.62321	0.630263	0.638482	0.645075	0.657521	0.662632	0.667368	0.668251	0.664665	0.660246	0.643446	0.624021	0.604296	0.603653	0.610835	0.627446	0.634207	0.634308	0.624374	0.61165	0.608246	0.61912	0.620575	0.613365	0.616111	0.608425	0.58759	0.586246	0.583904	0.572566	0.567009	0.565207	0.561772	0.550461	0.553353	0.541359	0.535189	0.534871	0.547545	0.549027	0.576629	0.606401	0.624877	0.635332
17N_1AP	0.456917	0.450424	0.43978	0.431333	0.417462	0.403114	0.404174	0.397962	0.396326	0.396811	0.403023	0.403659	0.405712	0.397174	0.392144	0.380424	0.377182	0.383076	0.398288	0.422212	0.451932	0.470068	0.485265	0.488045	0.484636	0.469424	0.472114	0.471326	0.449053	0.437561	0.423523	0.409652	0.4025	0.458705	0.494561	0.515674	0.528932	0.531167	0.509356	0.488629	0.482477	0.467402	0.461371	0.44772	0.442136	0.45547	0.466152	0.469629	0.472273
18N_1EP	0.412472	0.423715	0.451023	0.484511	0.487832	0.483812	0.476434	0.446097	0.418427	0.417417	0.420796	0.410065	0.40699	0.403314	0.407935	0.405301	0.408006	0.404809	0.40954	0.40954	0.409948	0.408621	0.412434	0.410227	0.414783	0.414065	0.409081	0.407023	0.414984	0.414822	0.406227	0.403812	0.407638	0.400634	0.38565	0.379107	0.371398	0.362207	0.347754	0.337146	0.327049	0.332919	0.332958	0.34545	0.364867	0.392369	0.415165	0.442822	0.511476
19N_2AP	0.77069	0.764983	0.750929	0.749592	0.739077	0.724393	0.72947	0.756188	0.779625	0.809831	0.835764	0.84253	0.826188	0.805138	0.786076	0.775101	0.780626	0.785407	0.795168	0.799044	0.800006	0.794608	0.797806	0.801162	0.805368	0.815195	0.818478	0.815271	0.80757	0.801204	0.779558	0.755271	0.732191	0.717764	0.690956	0.6823	0.684496	0.682611	0.679561	0.690817	0.700103	0.701967	0.721806	0.735943	0.74312	0.76082	0.78449	0.788778	0.801189
20N_2EP	0.527028	0.527907	0.525111	0.519563	0.521841	0.530211	0.531409	0.531938	0.541933	0.542272	0.514386	0.501661	0.498139	0.491383	0.48529	0.49763	0.503219	0.504319	0.509527	0.516082	0.517476	0.525033	0.56346	0.560082	0.558951	0.575753	0.586077	0.573913	0.566386	0.556288	0.571733	0.569398	0.57817	0.631794	0.65746	0.646612	0.630961	0.603347	0.550781	0.519398	0.492997	0.505285	0.517506	0.532684	0.55346	0.563661	0.556144	0.529594	0.515733
21N_3AP	0.754249	0.755396	0.764622	0.778827	0.775271	0.781707	0.745324	0.700427	0.6924	0.682124	0.649031	0.681689	0.744444	0.787351	0.837716	0.900222	0.906551	0.896373	0.8684	0.851929	0.820409	0.812533	0.79816	0.743529	0.680453	0.638756	0.589884	0.540676	0.502604	0.480613	0.440596	0.410667	0.329813	0.344302	0.377564	0.419689	0.449858	0.52456	0.5552	0.566898	0.570507	0.588284	0.605369	0.587529	0.588471	0.602222	0.615653	0.628302	0.658684
22N_3EP	0.487889	0.508657	0.500229	0.474627	0.463616	0.468952	0.477232	0.489247	0.509956	0.52679	0.527948	0.513041	0.502679	0.496945	0.500568	0.501196	0.505594	0.512052	0.515063	0.503919	0.557683	0.561232	0.565668	0.559181	0.563387	0.509306	0.511513	0.513321	0.532672	0.553417	0.564915	0.558524	0.540347	0.533225	0.520782	0.502465	0.494856	0.502317	0.492694	0.485328	0.493373	0.494745	0.494812	0.48614	0.49831	0.492568	0.490649	0.487446	0.491852
23N_4AP	0.494556	0.508568	0.516508	0.516079	0.511136	0.514163	0.532024	0.555221	0.598085	0.629323	0.654073	0.661535	0.642211	0.621305	0.633801	0.636918	0.637897	0.664296	0.676634	0.681511	0.675021	0.663861	0.635341	0.623613	0.60661	0.60487	0.607625	0.620369	0.621124	0.598665	0.552224	0.518526	0.506423	0.494647	0.504199	0.533112	0.546489	0.543432	0.545366	0.543088	0.559426	0.577112	0.596852	0.605849	0.612943	0.599885	0.584205	0.568157	0.558707
24N_4EP	0.443117	0.465153	0.48373	0.51054	0.520417	0.557902	0.581755	0.610221	0.62611	0.633141	0.628626	0.614209	0.577534	0.559227	0.548773	0.524822	0.532368	0.521313	0.473497	0.462209	0.474515	0.46789	0.474135	0.499129	0.489313	0.471362	0.477153	0.494454	0.482098	0.49816	0.501472	0.460945	0.458712	0.534638	0.560896	0.543988	0.538307	0.463988	0.405006	0.385791	0.40616	0.426037	0.486896	0.496429	0.500798	0.536196	0.565644	0.571227	0.566798
25N_1AC	0.605883	0.5909	0.580155	0.542913	0.531172	0.527223	0.533929	0.534764	0.56046	0.589042	0.602634	0.621961	0.642667	0.678175	0.69499	0.703676	0.716693	0.738589	0.738227	0.736227	0.741055	0.713359	0.684252	0.662181	0.647955	0.650887	0.665806	0.688155	0.689702	0.700576	0.694971	0.675858	0.65323	0.64965	0.616874	0.589366	0.555922	0.557385	0.570647	0.612518	0.640006	0.683346	0.698595	0.723081	0.717618	0.726142	0.727081	0.744777	0.752563
27N_2AC	0.74365	0.766713	0.782818	0.796627	0.793149	0.781743	0.758238	0.726871	0.687188	0.656891	0.624033	0.623135	0.632937	0.637637	0.615498	0.603135	0.557855	0.496594	0.438007	0.392614	0.352304	0.366587	0.417749	0.47938	0.527063	0.564871	0.582145	0.563234	0.544231	0.540106	0.526792	0.528964	0.552977	0.578007	0.607215	0.641822	0.677597	0.683683	0.68138	0.657723	0.651947	0.63332	0.620627	0.629452	0.641162	0.660224	0.661663	0.665201	0.648224
29N_3AC	0.578717	0.623726	0.648181	0.672087	0.684916	0.669757	0.64924	0.634935	0.60043	0.57096	0.522903	0.465863	0.417707	0.398928	0.366785	0.358928	0.365184	0.398866	0.429022	0.484368	0.549956	0.613439	0.653794	0.702754	0.728505	0.716748	0.686723	0.652156	0.599065	0.534449	0.499327	0.497782	0.497626	0.510231	0.520143	0.532685	0.510212	0.478766	0.475632	0.468112	0.457583	0.455252	0.500866	0.501489	0.519377	0.530293	0.56048	0.57038	0.592193
30N_3EC	0.358432	0.401057	0.421716	0.429648	0.443909	0.432716	0.424273	0.41133	0.415977	0.408284	0.397659	0.38433	0.37292	0.367227	0.369136	0.379966	0.350057	0.31567	0.316739	0.307716	0.302705	0.341477	0.364659	0.339284	0.346227	0.351193	0.333205	0.324125	0.346614	0.345295	0.362352	0.399852	0.423886	0.427295	0.411534	0.401057	0.371659	0.35617	0.342273	0.355409	0.35358	0.376852	0.388125	0.391068	0.394261	0.401273	0.394955	0.415909	0.432545
32N_4EC	0.195667	0.199616	0.22603	0.223283	0.245606	0.330687	0.366828	0.338465	0.325071	0.307717	0.238848	0.220071	0.257293	0.287727	0.334475	0.354242	0.344747	0.328808	0.336101	0.303899	0.297111	0.300333	0.298384	0.29602	0.281616	0.276333	0.255596	0.246677	0.235293	0.241828	0.247626	0.258596	0.25404	0.257414	0.248869	0.240848	0.251182	0.236071	0.229697	0.225343	0.221566	0.206929	0.225646	0.235394	0.23803	0.231838	0.243354	0.272495	0.295152
33N_1AP	0.276727	0.213437	0.221977	0.22654	0.27305	0.344633	0.411642	0.459396	0.51637	0.54285	0.552968	0.568962	0.590792	0.599971	0.601994	0.608745	0.608399	0.603085	0.588434	0.573601	0.550551	0.540499	0.540551	0.541155	0.549613	0.557625	0.56434	0.576317	0.597801	0.61651	0.633478	0.637777	0.642874	0.639959	0.633789	0.621167	0.603132	0.589613	0.583971	0.561026	0.538704	0.531062	0.513947	0.486029	0.470909	0.473015	0.474012	0.468205	0.478622
34N_1EP	0.642053	0.563079	0.506932	0.452011	0.386195	0.372074	0.384016	0.385532	0.380074	0.372953	0.383242	0.379553	0.368768	0.372932	0.395042	0.404626	0.413074	0.421958	0.421326	0.404737	0.384232	0.371895	0.372963	0.360958	0.355347	0.353011	0.350137	0.341768	0.348347	0.355816	0.368984	0.379042	0.377774	0.365584	0.353511	0.346779	0.344263	0.347895	0.368184	0.396847	0.402284	0.407732	0.413663	0.416384	0.411437	0.410774	0.402642	0.398558	0.387458
35N_2AP	0.557627	0.554059	0.546836	0.542638	0.53324	0.511223	0.496025	0.491263	0.486285	0.494315	0.506587	0.502868	0.499613	0.494323	0.492422	0.499827	0.509474	0.510923	0.510714	0.502524	0.50004	0.502378	0.505764	0.511712	0.520077	0.522595	0.524586	0.525097	0.52104	0.5224	0.526928	0.533013	0.53953	0.546438	0.552375	0.546175	0.539582	0.540629	0.53869	0.540586	0.552861	0.56298	0.565935	0.565614	0.560759	0.55518	0.547497	0.541425	0.547546
36N_2AP	0.408523	0.410933	0.423477	0.436513	0.440779	0.454954	0.4768	0.498051	0.508031	0.507805	0.502923	0.489097	0.494903	0.509436	0.528759	0.517385	0.524738	0.515097	0.492544	0.477292	0.512205	0.506964	0.514554	0.530431	0.515692	0.464041	0.440277	0.405333	0.380308	0.378451	0.392041	0.396718	0.415128	0.420677	0.426708	0.456451	0.465949	0.486349	0.504913	0.514051	0.490892	0.480749	0.467979	0.460554	0.460113	0.471518	0.492154	0.482277	0.467744
37N_3AP	0.68913	0.709791	0.705113	0.713322	0.719657	0.719682	0.702854	0.713431	0.713724	0.711916	0.720879	0.712736	0.721573	0.723272	0.704561	0.684895	0.693858	0.673414	0.651138	0.645874	0.634151	0.540084	0.533439	0.53928	0.545105	0.534577	0.623105	0.626017	0.619582	0.608795	0.641046	0.647314	0.658134	0.675925	0.709155	0.710435	0.708987	0.72918	0.730536	0.719866	0.710946	0.716845	0.715423	0.718008	0.727347	0.753197	0.758678	0.719724	0.686527
39N_4AP	0.815323	0.772262	0.720915	0.703623	0.688523	0.660069	0.634954	0.611031	0.580246	0.603185	0.623	0.652962	0.679069	0.708246	0.690615	0.680931	0.657808	0.649169	0.621292	0.583554	0.520669	0.4554	0.367015	0.297815	0.271885	0.274869	0.306923	0.394308	0.466523	0.5214	0.573269	0.598085	0.580162	0.571762	0.560123	0.564231	0.568723	0.572415	0.589146	0.631154	0.6417	0.642462	0.656115	0.6566	0.647423	0.647338	0.657877	0.649562	0.633131
41N_1AC	0.651231	0.667357	0.677643	0.677275	0.68494	0.68311	0.67028	0.667346	0.6605	0.654445	0.666775	0.681385	0.690478	0.695077	0.699363	0.705346	0.705214	0.705929	0.714868	0.711484	0.703148	0.702198	0.699676	0.699654	0.705027	0.715714	0.714203	0.713192	0.708016	0.711901	0.706879	0.717577	0.722802	0.718071	0.702401	0.706429	0.704407	0.706934	0.712126	0.727951	0.744346	0.758522	0.774456	0.789868	0.796896	0.787126	0.783066	0.766731	0.761599
42N_1EC	0.339891	0.342849	0.353254	0.369536	0.378035	0.37322	0.351363	0.33523	0.302089	0.298721	0.314573	0.339462	0.340444	0.344815	0.337067	0.314736	0.292326	0.275141	0.262015	0.261151	0.269847	0.285679	0.308212	0.328523	0.335496	0.339936	0.334464	0.322662	0.317037	0.314617	0.322938	0.331778	0.344351	0.342528	0.342696	0.33317	0.321615	0.317081	0.325896	0.332968	0.339669	0.353072	0.348538	0.34239	0.329684	0.323156	0.303304	0.300869	0.305274
43N_2AC	0.2847	0.288292	0.295465	0.309423	0.313004	0.320646	0.324827	0.320892	0.313662	0.327623	0.335592	0.338581	0.353465	0.3424	0.332669	0.333488	0.334492	0.326338	0.346708	0.354712	0.362569	0.374996	0.377015	0.365419	0.361723	0.366904	0.385819	0.383862	0.39505	0.403704	0.405912	0.40095	0.4152	0.421038	0.418838	0.414792	0.407535	0.399031	0.391669	0.396362	0.398969	0.396508	0.398042	0.411223	0.403077	0.393758	0.387804	0.385846	0.381062
44N_2EC	0.591716	0.603088	0.593115	0.587439	0.577351	0.587331	0.579385	0.5915	0.604493	0.604939	0.589858	0.579676	0.572743	0.563818	0.549514	0.546507	0.548696	0.55775	0.564588	0.568101	0.567115	0.57952	0.587453	0.594101	0.616385	0.632324	0.631223	0.621649	0.610824	0.61698	0.623372	0.637905	0.650446	0.672439	0.690432	0.708547	0.702047	0.707453	0.704493	0.698284	0.691973	0.697338	0.699818	0.700811	0.695622	0.679986	0.655142	0.632155	0.621142
45N_3AC	0.631118	0.648502	0.654774	0.687082	0.711405	0.73628	0.737513	0.741821	0.720717	0.715892	0.690237	0.69909	0.693534	0.679355	0.659125	0.665075	0.669541	0.677763	0.6641	0.651871	0.663333	0.641957	0.639756	0.669527	0.694839	0.720237	0.733061	0.719649	0.721097	0.699477	0.654287	0.652975	0.61876	0.58205	0.580781	0.550588	0.468695	0.47438	0.446724	0.371047	0.312939	0.281914	0.234538	0.224609	0.261534	0.336416	0.471032	0.594344	0.701821
46N_3EC	0.72961	0.73582	0.727554	0.718031	0.720359	0.727046	0.725393	0.725895	0.727938	0.712731	0.696074	0.685988	0.692563	0.686991	0.681926	0.671585	0.684322	0.691988	0.729889	0.740415	0.761015	0.763876	0.763616	0.751876	0.772402	0.76831	0.760526	0.744972	0.722991	0.699387	0.695585	0.700322	0.706031	0.700105	0.702471	0.691678	0.687771	0.693226	0.716483	0.707251	0.708211	0.698594	0.686582	0.657046	0.678402	0.698433	0.706786	0.715325	0.736012
49N_1AP	0.657853	0.691967	0.713799	0.728908	0.724163	0.736549	0.749989	0.742946	0.749859	0.743859	0.741728	0.718049	0.694364	0.687272	0.688049	0.68469	0.69281	0.711049	0.710799	0.714158	0.694864	0.699478	0.678777	0.686342	0.680663	0.682989	0.657125	0.664185	0.65256	0.671728	0.700978	0.732717	0.745158	0.760674	0.763092	0.74456	0.739473	0.708685	0.67275	0.61962	0.606663	0.565266	0.583554	0.613674	0.65119	0.637902	0.62863	0.604821	0.559739
50N_1EP	0.447463	0.449852	0.439428	0.419887	0.431767	0.42889	0.430191	0.422714	0.409251	0.405767	0.425965	0.436558	0.438198	0.432671	0.41477	0.395279	0.39142	0.404537	0.433739	0.474898	0.489251	0.460544	0.439922	0.402763	0.341915	0.295449	0.293378	0.272629	0.262205	0.264756	0.270459	0.26935	0.26959	0.260127	0.251527	0.246099	0.247364	0.246657	0.250106	0.250092	0.253675	0.249922	0.252876	0.257611	0.261442	0.260028	0.263852	0.266127	0.266883
51N_2AP	0.87214	0.883048	0.891072	0.891455	0.896576	0.899545	0.889202	0.87161	0.861029	0.842805	0.826135	0.810349	0.811843	0.817263	0.830248	0.835728	0.850725	0.854427	0.851781	0.84946	0.85479	0.853145	0.851627	0.851051	0.849489	0.843366	0.841096	0.841014	0.844836	0.853542	0.866846	0.872747	0.878176	0.877417	0.866511	0.856911	0.852506	0.853781	0.851969	0.850243	0.849986	0.847373	0.844287	0.847104	0.850198	0.852793	0.858253	0.857234	0.859535
52N_2EP	0.372384	0.367263	0.386869	0.432152	0.475838	0.510485	0.54096	0.54402	0.524929	0.49598	0.466111	0.450939	0.445182	0.44303	0.441172	0.44904	0.44102	0.424848	0.425626	0.424051	0.424899	0.44302	0.458646	0.460949	0.441747	0.426162	0.406919	0.386677	0.36396	0.383293	0.365333	0.332586	0.322768	0.33997	0.345313	0.388616	0.449626	0.482283	0.484323	0.509202	0.568384	0.633051	0.709747	0.79201	0.778273	0.687172	0.597374	0.522192	0.439848
53N_3AP	0.742644	0.755783	0.762968	0.761902	0.760375	0.754316	0.749846	0.759168	0.779475	0.793168	0.808998	0.825697	0.824328	0.814563	0.806627	0.779697	0.761151	0.754316	0.753629	0.75438	0.780861	0.78522	0.775096	0.767881	0.770763	0.75762	0.754333	0.759186	0.762699	0.758038	0.762772	0.761181	0.765109	0.760119	0.74942	0.738235	0.733565	0.731262	0.738141	0.742064	0.737365	0.748469	0.745565	0.742768	0.752904	0.765134	0.757672	0.761399	0.760239
54N_3EP	0.247099	0.248168	0.24688	0.250031	0.267435	0.284366	0.297225	0.299194	0.298565	0.283571	0.28023	0.270073	0.281131	0.288565	0.303487	0.312984	0.325696	0.327749	0.318	0.302293	0.291644	0.285361	0.274618	0.285613	0.298785	0.311529	0.316984	0.343152	0.359298	0.378681	0.400314	0.382545	0.335382	0.293215	0.244209	0.192188	0.176157	0.166272	0.15734	0.155089	0.153162	0.156461	0.156681	0.153037	0.149372	0.149403	0.158942	0.227937	0.253236
55N_4AP	0.492238	0.52981	0.540667	0.574321	0.602464	0.590381	0.559857	0.54294	0.514167	0.49275	0.521274	0.537488	0.549881	0.556381	0.569298	0.561012	0.583512	0.566512	0.559393	0.52944	0.502976	0.475024	0.474726	0.470179	0.474619	0.468929	0.441214	0.439214	0.45244	0.478464	0.510417	0.580714	0.622774	0.618024	0.60631	0.57769	0.514214	0.480405	0.483036	0.476524	0.479298	0.493905	0.488905	0.502405	0.535702	0.583095	0.615226	0.662155	0.672226
56N_4EP	0.331054	0.334995	0.330215	0.320101	0.305379	0.300758	0.289213	0.286098	0.285753	0.289187	0.291837	0.306865	0.319681	0.326533	0.33282	0.339177	0.32919	0.321285	0.321603	0.313967	0.308608	0.321776	0.323902	0.337493	0.386569	0.394107	0.377402	0.382985	0.367545	0.320576	0.316374	0.322963	0.319044	0.316055	0.307652	0.29398	0.294189	0.29465	0.29946	0.304075	0.311444	0.309997	0.306354	0.299597	0.296361	0.289502	0.283265	0.283584	0.287629
58N_1EC	0.251911	0.25128	0.244053	0.235893	0.241831	0.254302	0.263796	0.285556	0.29392	0.296133	0.30488	0.300409	0.287751	0.303387	0.307938	0.303191	0.299342	0.300027	0.272978	0.254009	0.249956	0.251573	0.238	0.233716	0.22752	0.219618	0.21288	0.215049	0.215813	0.21568	0.216969	0.225529	0.241867	0.253076	0.255564	0.246027	0.243396	0.241982	0.245218	0.256933	0.285911	0.298596	0.298347	0.303529	0.294409	0.275627	0.268267	0.292036	0.319742
60N_2EC	0.423026	0.463064	0.504473	0.51627	0.535017	0.528298	0.535196	0.536473	0.548199	0.564662	0.586057	0.590421	0.597716	0.592998	0.556128	0.500071	0.445626	0.389801	0.352752	0.331868	0.3326	0.336028	0.339191	0.337296	0.337518	0.328955	0.323924	0.331064	0.362388	0.362392	0.368274	0.373348	0.369532	0.34243	0.354842	0.361726	0.367381	0.368851	0.368657	0.361442	0.357097	0.345272	0.335697	0.331296	0.335092	0.336411	0.344671	0.35913	0.364846
61N_3AC	0.695359	0.686139	0.669792	0.692771	0.700701	0.718139	0.743948	0.764173	0.752727	0.731082	0.725965	0.711861	0.685983	0.693229	0.689186	0.676381	0.669385	0.698649	0.724788	0.748026	0.755065	0.75942	0.720632	0.682952	0.660597	0.608113	0.580312	0.591108	0.604667	0.593584	0.605221	0.609801	0.614381	0.617022	0.633359	0.666537	0.670078	0.671394	0.672571	0.649108	0.631887	0.598147	0.617498	0.61445	0.605177	0.618199	0.648926	0.59361	0.589126
63N_4AC	0.587	0.583867	0.571345	0.557681	0.55346	0.535708	0.504637	0.489212	0.473584	0.450805	0.462991	0.484513	0.478929	0.482956	0.513283	0.551044	0.58115	0.608044	0.631487	0.641	0.625044	0.612655	0.559761	0.529345	0.512389	0.509035	0.505743	0.543088	0.550779	0.550496	0.549204	0.550221	0.557876	0.579973	0.575442	0.57869	0.60315	0.607381	0.610478	0.612814	0.606867	0.578912	0.564558	0.540009	0.512628	0.476133	0.445363	0.423814	0.425363
64N_4EC	0.157267	0.155853	0.158944	0.163022	0.168064	0.175154	0.168533	0.16534	0.165443	0.162176	0.161888	0.174484	0.17176	0.167844	0.167002	0.163183	0.156592	0.159105	0.161359	0.152988	0.147315	0.14601	0.141902	0.139447	0.142289	0.135716	0.134782	0.145154	0.156029	0.163164	0.178773	0.195985	0.205335	0.212352	0.221408	0.225281	0.213687	0.202367	0.195545	0.183946	0.179897	0.186675	0.187844	0.188401	0.192421	0.197296	0.194724	0.194592	0.193844
65N_1AP	0.771327	0.803392	0.821482	0.838194	0.843172	0.84079	0.838783	0.829825	0.819987	0.824479	0.823366	0.813909	0.796395	0.779896	0.770194	0.76954	0.775586	0.792511	0.817405	0.812893	0.813055	0.820117	0.838252	0.84211	0.845042	0.849456	0.856123	0.862576	0.878693	0.897068	0.908091	0.913178	0.917463	0.915223	0.909948	0.903489	0.887981	0.852647	0.825702	0.812291	0.782356	0.742129	0.741981	0.739502	0.738395	0.741191	0.767107	0.774945	0.770123
66N_1EP	0.39301	0.379192	0.393365	0.378337	0.346663	0.342596	0.369558	0.412538	0.429692	0.437942	0.444933	0.419019	0.363788	0.364423	0.370933	0.363375	0.367279	0.360173	0.36399	0.374788	0.388933	0.410298	0.432125	0.432538	0.43776	0.441654	0.437385	0.433596	0.440933	0.431519	0.416779	0.404837	0.400663	0.383721	0.352375	0.3265	0.304067	0.273788	0.247317	0.254183	0.263712	0.276404	0.289673	0.308346	0.309548	0.30774	0.312529	0.308817	0.309625
67N_2AP	0.551891	0.468762	0.418802	0.401257	0.428812	0.46102	0.497554	0.490901	0.452792	0.440535	0.45003	0.44397	0.446416	0.48599	0.512188	0.492287	0.505584	0.507634	0.495248	0.486653	0.494604	0.516069	0.574059	0.666059	0.728663	0.795257	0.830198	0.801802	0.734505	0.696277	0.644307	0.620327	0.631079	0.677554	0.697584	0.704564	0.727178	0.693109	0.630881	0.565	0.530277	0.485812	0.468376	0.479673	0.525891	0.545594	0.558238	0.619792	0.654515
68N_2EP	0.393921	0.411145	0.408289	0.422697	0.444586	0.462625	0.472164	0.479355	0.502566	0.501105	0.486217	0.495303	0.523428	0.529868	0.560632	0.603691	0.615757	0.601342	0.575224	0.526276	0.47098	0.431454	0.446368	0.475678	0.480533	0.500211	0.531204	0.536053	0.529125	0.557783	0.575592	0.578263	0.598618	0.627724	0.683447	0.740336	0.778013	0.784395	0.754914	0.715566	0.680316	0.683118	0.685513	0.663513	0.634895	0.579303	0.515382	0.455533	0.457546
70N_3EP	0.243074	0.261124	0.274226	0.28089	0.294693	0.298735	0.282813	0.281018	0.273095	0.260367	0.270671	0.287322	0.290989	0.296113	0.307576	0.306007	0.301802	0.299329	0.309399	0.317392	0.314989	0.306813	0.305795	0.291138	0.27783	0.262862	0.270912	0.276148	0.290141	0.315004	0.336509	0.331505	0.325689	0.329519	0.329293	0.325194	0.321102	0.319336	0.304375	0.282276	0.271767	0.27412	0.290777	0.315625	0.340601	0.366304	0.379929	0.38188	0.392445
72N_4EP	0.594244	0.593398	0.596519	0.590075	0.581237	0.575568	0.580639	0.579289	0.583398	0.605496	0.623962	0.648391	0.697515	0.745752	0.778086	0.826955	0.861274	0.862816	0.818278	0.801368	0.767538	0.729947	0.679977	0.686004	0.66506	0.638752	0.61247	0.629842	0.660132	0.698263	0.730414	0.782188	0.815218	0.822004	0.817293	0.792665	0.747154	0.697966	0.651929	0.610526	0.607429	0.643797	0.635184	0.638872	0.64897	0.649526	0.617308	0.632395	0.632105
73N_1AC	0.791976	0.786585	0.768481	0.757702	0.752394	0.748654	0.772135	0.797356	0.806779	0.796716	0.797775	0.798332	0.804277	0.799467	0.817225	0.828983	0.839315	0.843149	0.856983	0.858657	0.859855	0.868744	0.876291	0.87245	0.875111	0.87708	0.877941	0.871166	0.882062	0.884536	0.889076	0.890204	0.897927	0.895301	0.899997	0.902844	0.896107	0.897235	0.900412	0.895163	0.890824	0.899197	0.904218	0.89636	0.897675	0.895785	0.889682	0.883273	0.898197
74N_1EC	0.218203	0.218991	0.2092	0.201317	0.203569	0.211249	0.213169	0.219446	0.225458	0.216252	0.210431	0.218874	0.218671	0.210074	0.220658	0.227902	0.220431	0.223218	0.236634	0.242591	0.237698	0.244825	0.24656	0.240782	0.231317	0.227428	0.222671	0.214086	0.215372	0.219871	0.223483	0.226966	0.235686	0.234025	0.247557	0.247114	0.248812	0.257052	0.282634	0.293243	0.349415	0.38152	0.427877	0.468757	0.463908	0.421311	0.399662	0.349797	0.284646
75N_2AC	0.723423	0.697344	0.675575	0.657764	0.632409	0.629706	0.661753	0.660903	0.668824	0.66473	0.650462	0.616887	0.606236	0.578126	0.571433	0.560199	0.566047	0.580924	0.591927	0.587648	0.572635	0.544698	0.513554	0.502882	0.51884	0.539864	0.564593	0.599743	0.62221	0.633706	0.654483	0.665328	0.675113	0.685669	0.686236	0.704619	0.723129	0.73157	0.735081	0.752588	0.738824	0.733218	0.734378	0.690651	0.651501	0.635801	0.607911	0.602415	0.632572
76N_3EC	0.358595	0.444226	0.518738	0.563754	0.629364	0.692944	0.689969	0.669169	0.641405	0.593333	0.508195	0.449221	0.398738	0.348195	0.29279	0.264441	0.252841	0.250431	0.259928	0.283241	0.295754	0.281097	0.268472	0.254646	0.243785	0.239826	0.26041	0.269651	0.276831	0.276031	0.27959	0.270103	0.284564	0.285456	0.292338	0.269928	0.270513	0.250656	0.239477	0.232359	0.230031	0.223354	0.213692	0.228667	0.271128	0.318	0.322995	0.342605	0.352297
77N_3AC	0.74282	0.768041	0.781448	0.795087	0.821936	0.845558	0.829221	0.808006	0.798453	0.783826	0.787337	0.812738	0.814215	0.804686	0.779012	0.68632	0.577366	0.537634	0.486407	0.410459	0.433099	0.50082	0.550209	0.596924	0.67464	0.700047	0.725064	0.737884	0.756035	0.768564	0.787006	0.77007	0.766308	0.777471	0.778209	0.786029	0.802256	0.79357	0.775895	0.773198	0.751587	0.752052	0.744302	0.734808	0.663081	0.607878	0.529128	0.500698	0.50532
79N_4AC	0.515157	0.511478	0.539177	0.592187	0.625853	0.627385	0.617318	0.607478	0.625151	0.634234	0.630328	0.643338	0.673806	0.669813	0.666127	0.666729	0.665043	0.649258	0.64014	0.644575	0.650475	0.636803	0.598649	0.590916	0.597518	0.614234	0.654696	0.731799	0.779498	0.778997	0.787692	0.788977	0.778582	0.771799	0.789217	0.784783	0.79493	0.810722	0.811953	0.803472	0.82113	0.831873	0.801532	0.774769	0.774328	0.745398	0.707064	0.684522	0.666562
80N_4EC	0.491143	0.478964	0.491902	0.521214	0.544938	0.579777	0.601384	0.622795	0.631446	0.623768	0.592241	0.569902	0.543616	0.519598	0.501009	0.516795	0.526804	0.532286	0.540241	0.546929	0.539098	0.54258	0.543911	0.529313	0.528973	0.52867	0.505804	0.498848	0.512196	0.518839	0.543321	0.589759	0.617518	0.631688	0.642357	0.652339	0.649268	0.657893	0.675509	0.677196	0.655554	0.665973	0.673884	0.678027	0.70233	0.74283	0.748884	0.740304	0.733634
83N_2EC	0.177099	0.184395	0.184565	0.175515	0.172811	0.167797	0.171072	0.175179	0.184203	0.186608	0.186549	0.185547	0.199547	0.211147	0.203061	0.196107	0.199419	0.198379	0.197467	0.21136	0.222843	0.218075	0.213664	0.230683	0.272512	0.341445	0.432155	0.522267	0.595184	0.647195	0.678485	0.690805	0.706261	0.646421	0.55312	0.464955	0.366603	0.258336	0.222651	0.212725	0.191792	0.184037	0.178693	0.17304	0.173872	0.177563	0.177083	0.180149	0.179989
84N_4EP	0.174201	0.166491	0.159472	0.145941	0.142	0.13884	0.128	0.12632	0.140989	0.160208	0.183948	0.229197	0.255204	0.250981	0.237621	0.227071	0.204089	0.186885	0.192587	0.194439	0.196045	0.187011	0.188134	0.192877	0.225926	0.3031	0.402558	0.527628	0.665331	0.754015	0.810825	0.872357	0.817019	0.676476	0.547264	0.405599	0.243442	0.168513	0.172208	0.180818	0.179762	0.174491	0.163271	0.148491	0.131651	0.128364	0.132022	0.134662	0.129643
[truncated: 8 more columns]

## Sheet: window_std
Subjects	W1	W2	W3	W4	W5	W6	W7	W8	W9	W10	W11	W12	W13	W14	W15	W16	W17	W18	W19	W20	W21	W22	W23	W24	W25	W26	W27	W28	W29	W30	W31	W32	W33	W34	W35	W36	W37	W38	W39	W40	W41	W42	W43	W44	W45	W46	W47	W48	W49
01N_1AP	0.0658341	0.0388537	0.0434687	0.0441729	0.0465314	0.0400468	0.041681	0.0474498	0.0379588	0.0651287	0.112761	0.114418	0.10181	0.0987154	0.0795283	0.0772619	0.0797504	0.0853618	0.055687	0.0379348	0.0372587	0.036206	0.038482	0.0455499	0.0513368	0.0525984	0.0469089	0.03184	0.0336844	0.0391096	0.0437136	0.0489276	0.0456812	0.045791	0.0433233	0.034536	0.0592379	0.0690885	0.0700228	0.0920345	0.113914	0.110378	0.0959618	0.0712696	0.0673656	0.0602963	0.0662201	0.06851	0.0751592
02N_1EP	0.0719676	0.071422	0.0700735	0.0901122	0.0907366	0.0942155	0.146312	0.180678	0.210435	0.182732	0.0732839	0.0365985	0.0319628	0.0178152	0.0178049	0.0190334	0.0158146	0.0201125	0.0252018	0.0265241	0.0244069	0.0370548	0.0351858	0.0419297	0.0506012	0.0512728	0.0381404	0.0433026	0.0422499	0.0309603	0.0315356	0.0286571	0.0279933	0.0290242	0.0365597	0.0363983	0.0359802	0.0310793	0.0232278	0.0179332	0.0201048	0.020654	0.0204582	0.0215332	0.0203868	0.0270143	0.0283083	0.0281414	0.0289295
03N_2AP	0.0414398	0.0356488	0.0380585	0.0417696	0.0400583	0.046299	0.0707887	0.0724619	0.0716097	0.063066	0.0682521	0.0615783	0.0603261	0.0518974	0.0364691	0.0626395	0.0715541	0.0779843	0.0794402	0.0859299	0.0603915	0.043245	0.0436354	0.0507821	0.0693666	0.0850602	0.0754032	0.0617206	0.101745	0.137291	0.129267	0.0917355	0.0605364	0.0579653	0.0730148	0.0866435	0.0662838	0.0653844	0.0740747	0.0779248	0.0921344	0.0981425	0.0879882	0.0823957	0.0606104	0.044501	0.0430195	0.0397503	0.0611638
04N_2EP	0.0297862	0.0291617	0.0487574	0.0491541	0.0462156	0.0469565	0.0500596	0.0430848	0.0322552	0.0302554	0.0319184	0.0296057	0.0320405	0.0284393	0.0251297	0.0212937	0.0222405	0.0197525	0.0213696	0.0255833	0.0267095	0.0168782	0.0211636	0.0244637	0.0242826	0.0238264	0.0240216	0.0235558	0.0254988	0.0310798	0.0305623	0.021343	0.0203256	0.0201293	0.022777	0.0272366	0.0283342	0.0321574	0.0346508	0.0338405	0.0290145	0.0226227	0.0180156	0.0197194	0.0207777	0.032564	0.0422658	0.0490486	0.0497965
05N_3AP	0.0420597	0.0544683	0.056529	0.050472	0.0302147	0.0313562	0.0413833	0.0405976	0.0591002	0.0705082	0.0696299	0.0425555	0.0340623	0.0307495	0.0270594	0.027348	0.0276742	0.0336991	0.0278878	0.0233227	0.0225031	0.0235509	0.0188062	0.0247914	0.0419735	0.0477032	0.0472896	0.0455265	0.0419214	0.0368436	0.0339131	0.0461643	0.0591062	0.0574285	0.0529906	0.0568638	0.0977553	0.100993	0.0943729	0.0667601	0.0675238	0.0656025	0.0728257	0.0838268	0.0879238	0.0868043	0.0723418	0.0501804	0.0555085
06N_3EP	0.0226507	0.0279547	0.0356683	0.0340725	0.0373147	0.0413582	0.0378595	0.0346844	0.0401348	0.0327615	0.0174873	0.0170764	0.0226469	0.0186533	0.0163774	0.0165836	0.0170869	0.013421	0.0109121	0.0127374	0.0133192	0.0130423	0.0195396	0.0202705	0.0200415	0.0174549	0.0156929	0.0164854	0.0199278	0.0198254	0.0272016	0.0281849	0.0288896	0.0353609	0.0532388	0.0613772	0.0499536	0.055486	0.0689994	0.0682847	0.046437	0.0144801	0.016978	0.0205908	0.0247606	0.0265221	0.025965	0.0234965	0.020116
07N_4AP	0.0390183	0.0406741	0.0523521	0.0474475	0.0432578	0.0462501	0.0492734	0.0375024	0.0316193	0.0490226	0.0499135	0.0455015	0.0536688	0.0533057	0.0476514	0.0475652	0.048051	0.0278016	0.0277828	0.0446557	0.0508067	0.0597503	0.0660485	0.0791617	0.0675657	0.0398289	0.0400388	0.0332426	0.0406522	0.0433785	0.0442043	0.0413802	0.0390851	0.0304063	0.0404524	0.0346824	0.0392999	0.0399916	0.041398	0.0338702	0.0341096	0.0312727	0.0315918	0.0396247	0.0399764	0.0394167	0.0377614	0.0505524	0.0733575
08N_4EP	0.0647784	0.0846477	0.090625	0.0928352	0.113225	0.107604	0.0909521	0.0804652	0.0741696	0.0554988	0.0511771	0.0672382	0.0685029	0.0692163	0.0603758	0.0621505	0.0526384	0.0592624	0.0528752	0.0711085	0.0809621	0.0953971	0.0974756	0.0815188	0.0796584	0.0924492	0.070781	0.0639815	0.0653689	0.0648552	0.0543734	0.0472812	0.0491764	0.0754951	0.0735628	0.0781049	0.0755826	0.0830719	0.061678	0.0611971	0.0850595	0.110472	0.113736	0.120894	0.125892	0.120552	0.114799	0.127193	0.0990269
09N_1EC	0.0314342	0.0404441	0.0439436	0.0414414	0.0469217	0.0571686	0.0587891	0.052077	0.0922674	0.0791695	0.0843979	0.0861211	0.0944664	0.0387849	0.0336166	0.0345204	0.0282138	0.0294575	0.0318019	0.0314224	0.0308977	0.0362728	0.044661	0.0443854	0.0755323	0.0972594	0.100956	0.102502	0.106209	0.0763949	0.0374573	0.0313941	0.0300186	0.0354024	0.0557845	0.0520238	0.0459414	0.0416726	0.0379696	0.0275249	0.0423925	0.0403755	0.0427018	0.028167	0.0776631	0.113969	0.188057	0.228549	0.226498
10N_1AC	0.0659016	0.0585009	0.0766073	0.103165	0.111463	0.0962059	0.0594581	0.0450048	0.0370637	0.0506006	0.0529397	0.0535349	0.0574959	0.169751	0.156968	0.170683	0.176982	0.184589	0.082295	0.0470788	0.0459242	0.0423332	0.0562162	0.0649461	0.0627651	0.0674185	0.0681703	0.0483097	0.0480372	0.032647	0.0427698	0.0610763	0.0814186	0.0798717	0.0685181	0.0608119	0.0688195	0.0550109	0.0438477	0.0251209	0.0319266	0.0422619	0.0468278	0.0476298	0.0483508	0.0490902	0.0360917	0.0286128	0.0267627
11N_2AC	0.0827307	0.0788648	0.0584507	0.0444904	0.0462712	0.0459276	0.0442094	0.0320361	0.0354698	0.0353103	0.0393938	0.0463808	0.0463516	0.0336372	0.0294644	0.0293025	0.0315876	0.0272816	0.0238719	0.0226661	0.0255063	0.0341643	0.0327523	0.0352397	0.0407022	0.0442867	0.0520537	0.051538	0.0576564	0.0670063	0.0961515	0.0795379	0.062002	0.0656661	0.064623	0.0612809	0.0649432	0.0651643	0.0499755	0.0470912	0.04008	0.0231547	0.0293166	0.0256582	0.0376315	0.0387698	0.0384214	0.0426034	0.0421852
13N_3EC	0.11649	0.0517129	0.0295982	0.0249567	0.0241363	0.027842	0.0331969	0.03083	0.029782	0.0262291	0.0258359	0.032643	0.0611023	0.0811688	0.0834995	0.0848358	0.0814821	0.0769707	0.0752477	0.0574728	0.0686024	0.05385	0.0582384	0.0493139	0.0360756	0.0363312	0.0430288	0.0429985	0.0421618	0.0609684	0.0778318	0.071746	0.0610244	0.0472484	0.0250229	0.0283721	0.0307685	0.0368443	0.0333658	0.0313763	0.03217	0.0286562	0.103088	0.147701	0.155545	0.137067	0.10602	0.0910575	0.100145
14N_3EC	0.0236303	0.0239812	0.0244641	0.0263491	0.0280058	0.0343278	0.0349567	0.0361272	0.0371868	0.0399379	0.0376429	0.0370005	0.0431257	0.0391915	0.0293463	0.0295953	0.0310172	0.0234392	0.0224599	0.0211479	0.0286698	0.027238	0.0272426	0.0307225	0.0577819	0.0748646	0.0847979	0.0863209	0.0863827	0.0605028	0.0347885	0.0584162	0.100249	0.0993947	0.0906234	0.063332	0.0639166	0.029023	0.0451383	0.0642935	0.0604744	0.0591776	0.0546228	0.0611515	0.0729605	0.0922182	0.113796	0.109791	0.166257
15N_4AC	0.0279415	0.0252121	0.0268301	0.0294347	0.032972	0.0309095	0.0354216	0.0417972	0.0415293	0.0275859	0.0260776	0.0232916	0.0258898	0.0366421	0.0403105	0.0516676	0.0533028	0.0432089	0.0351197	0.0414413	0.0426836	0.0362887	0.0362433	0.0375976	0.0330736	0.0267976	0.0352578	0.0344313	0.042878	0.0418344	0.0417652	0.0412557	0.0442108	0.0446168	0.0439498	0.038603	0.0312579	0.0279558	0.0467042	0.0471405	0.0476278	0.0517138	0.0496818	0.0383441	0.040507	0.0541667	0.0515689	0.0519724	0.0443935
17N_1AP	0.0315476	0.0378165	0.0354515	0.0334458	0.032198	0.0272905	0.0272297	0.025923	0.024273	0.0226764	0.0239145	0.0253633	0.0295089	0.0346719	0.0373323	0.0359008	0.0344413	0.0388972	0.042011	0.0506935	0.0502533	0.0435657	0.045704	0.0434876	0.0455116	0.0461749	0.0489656	0.0434277	0.0964427	0.0984263	0.108418	0.101069	0.0951258	0.10191	0.108892	0.0842539	0.0764651	0.0741979	0.0592479	0.0401398	0.0479772	0.0487932	0.0483772	0.0371218	0.0328788	0.0347174	0.0288267	0.0286941	0.0313866
18N_1EP	0.0463647	0.0595304	0.0875695	0.084507	0.083391	0.0852554	0.084152	0.0649324	0.0407794	0.0332942	0.0315881	0.0213516	0.0195302	0.0199618	0.0171409	0.0161654	0.0183701	0.0186519	0.0162878	0.0173159	0.018589	0.0183157	0.0172329	0.0193499	0.0187005	0.0190142	0.0228647	0.0222704	0.0249943	0.0248229	0.0327168	0.0315428	0.0330933	0.0285668	0.0364776	0.0421849	0.0446854	0.0397711	0.0376656	0.0383129	0.0449688	0.050462	0.0480916	0.0522426	0.0493767	0.0295123	0.052135	0.0677754	0.131062
19N_2AP	0.0250161	0.0326864	0.0338849	0.0330545	0.0323735	0.026758	0.0292477	0.0558963	0.0663871	0.067068	0.0444888	0.0331333	0.0504989	0.0617786	0.05211	0.0436765	0.0462519	0.0397946	0.0238693	0.0215567	0.020754	0.0159598	0.011192	0.0114631	0.0127152	0.0182937	0.0164922	0.0196605	0.026212	0.0282242	0.0341288	0.0429716	0.0467031	0.0417362	0.0446403	0.0487111	0.0497258	0.0509672	0.0517715	0.0404418	0.0317121	0.0862495	0.0878313	0.0860267	0.0842761	0.089543	0.0402554	0.041321	0.0394524
20N_2EP	0.0213376	0.0176867	0.0191061	0.0200143	0.0199948	0.0293475	0.0291594	0.0273656	0.0223884	0.0231921	0.0489562	0.051375	0.0509771	0.0453426	0.041568	0.0252574	0.0188307	0.0212246	0.0357308	0.0385754	0.0501351	0.061032	0.100354	0.0993362	0.0986129	0.0932009	0.086769	0.0644864	0.0892281	0.134609	0.145152	0.170027	0.185013	0.187835	0.15099	0.154664	0.137146	0.121076	0.0878017	0.0812814	0.0483732	0.0564089	0.0697253	0.0700839	0.0548958	0.038794	0.0406837	0.0382807	0.0308697
21N_3AP	0.0472923	0.0444726	0.0506554	0.0450197	0.05154	0.0476066	0.0814475	0.0818066	0.0757397	0.0803749	0.0763774	0.0884124	0.122979	0.150483	0.141299	0.0724752	0.0661946	0.0627165	0.0580484	0.0488642	0.0533833	0.0530214	0.0445909	0.115702	0.145109	0.151416	0.157137	0.118	0.138567	0.139564	0.142854	0.125611	0.139941	0.158494	0.182265	0.191639	0.190018	0.109174	0.0608445	0.0586214	0.060429	0.0531518	0.0514729	0.0750048	0.073795	0.0742427	0.0811478	0.0807889	0.0409198
22N_3EP	0.0471154	0.0470203	0.0445223	0.0497948	0.0558248	0.0657848	0.0736576	0.078331	0.0684809	0.0495366	0.0379662	0.024872	0.0201635	0.020831	0.0252945	0.0257655	0.0279662	0.0255502	0.0218934	0.0452741	0.134213	0.135477	0.135931	0.139823	0.133097	0.051047	0.0537967	0.0570183	0.0560845	0.0478009	0.0401995	0.0387096	0.0518447	0.0497619	0.0462579	0.0425206	0.04061	0.0358112	0.0331659	0.0330859	0.0341642	0.0323909	0.0402907	0.0513807	0.0544948	0.0556857	0.0555384	0.0529641	0.0424864
23N_4AP	0.0389655	0.0380805	0.0401077	0.0425064	0.0440579	0.0441331	0.0628256	0.0820683	0.0969986	0.0719133	0.0479796	0.0500815	0.0677145	0.0577079	0.0599848	0.0582205	0.0545385	0.0359162	0.0200548	0.0231312	0.0449744	0.0539373	0.0657072	0.0645846	0.0508751	0.0436118	0.046487	0.037741	0.0389606	0.0663331	0.105733	0.103044	0.097016	0.0878703	0.0890066	0.0644225	0.054733	0.0486676	0.0419201	0.0346361	0.0423122	0.0384067	0.0395132	0.0370227	0.0312206	0.0439051	0.055207	0.0489823	0.0442179
24N_4EP	0.0469785	0.0478328	0.0590509	0.0599778	0.0599514	0.0621091	0.05569	0.0781571	0.10764	0.104438	0.106477	0.113156	0.105107	0.0652411	0.0750653	0.078038	0.0928389	0.139726	0.191251	0.186835	0.187689	0.185104	0.164608	0.103764	0.104867	0.102285	0.100498	0.0949275	0.104985	0.126105	0.133874	0.129731	0.150005	0.190408	0.201096	0.205006	0.21024	0.241403	0.185239	0.135384	0.142406	0.138506	0.0858429	0.0882372	0.0925385	0.112077	0.109917	0.0850002	0.0858548
25N_1AC	0.0591512	0.0526089	0.0560231	0.0759193	0.0778698	0.0767552	0.0870782	0.0888404	0.0814964	0.0750962	0.0744679	0.085848	0.0774742	0.0627326	0.0528398	0.0506751	0.0605772	0.0594459	0.0600381	0.0584619	0.0484593	0.0537318	0.0481865	0.0419266	0.0424017	0.0511052	0.0583208	0.0639283	0.0726732	0.0640388	0.0633902	0.0659044	0.0605267	0.0646665	0.081391	0.0758005	0.0903739	0.0907865	0.0947605	0.105586	0.104144	0.0620297	0.0660757	0.0776854	0.0848252	0.0822913	0.0742936	0.0748714	0.0885245
27N_2AC	0.0879326	0.0670564	0.0584566	0.0568363	0.0572423	0.0618024	0.090499	0.102525	0.0994555	0.0757123	0.0550135	0.0605218	0.0639145	0.0621166	0.069581	0.0837047	0.121363	0.123985	0.110702	0.102262	0.0629292	0.0768967	0.128704	0.151977	0.132298	0.0902368	0.0634771	0.0628681	0.043754	0.0394708	0.0535666	0.058162	0.0748831	0.0934886	0.0991862	0.062548	0.0498661	0.0530082	0.0509335	0.0710048	0.073899	0.0638494	0.0576765	0.0676082	0.0706819	0.0681111	0.0668385	0.0631997	0.0589765
29N_3AC	0.113643	0.123487	0.110244	0.0800555	0.075165	0.0737098	0.0571978	0.0760049	0.108884	0.100595	0.112075	0.114436	0.123049	0.117884	0.097152	0.084385	0.0717127	0.0557505	0.069001	0.107997	0.122313	0.107761	0.0884166	0.0611797	0.0602408	0.0823748	0.10356	0.134951	0.134243	0.102878	0.0768262	0.0752318	0.051372	0.0603468	0.0659567	0.0749506	0.0991176	0.121107	0.118264	0.113243	0.101677	0.0890574	0.0823074	0.0815152	0.0806119	0.0728991	0.0476808	0.0476368	0.0563309
30N_3EC	0.0944039	0.069788	0.0814043	0.0726667	0.0568386	0.058413	0.0578497	0.0434768	0.041625	0.0494276	0.0606076	0.0666011	0.0565214	0.0515655	0.0486683	0.0420822	0.088635	0.101491	0.10596	0.10398	0.107007	0.0920621	0.0667355	0.0571214	0.0560535	0.0467878	0.048231	0.0493707	0.0568796	0.0571395	0.0753381	0.0788351	0.0607439	0.0675063	0.0893785	0.0830374	0.0768926	0.0839495	0.0717669	0.0631849	0.0635529	0.0698003	0.0561268	0.0533713	0.0505036	0.0516264	0.0468334	0.060294	0.0568351
32N_4EC	0.0503721	0.05117	0.0627097	0.0615945	0.094139	0.178667	0.193871	0.210482	0.222321	0.222923	0.146258	0.0920224	0.10013	0.0746803	0.105576	0.0938899	0.0998128	0.102156	0.0981534	0.0467749	0.0431943	0.0422074	0.0457112	0.046143	0.0418075	0.0462091	0.0586433	0.0596996	0.0514969	0.0567567	0.0603409	0.0533857	0.0585438	0.0578792	0.0533106	0.0522087	0.0706831	0.0882852	0.0877925	0.0876845	0.0811277	0.058647	0.0369818	0.044454	0.0417496	0.0431328	0.0471644	0.0600723	0.0760324
33N_1AP	0.166651	0.0296805	0.0332699	0.0348367	0.0940904	0.133555	0.140402	0.115017	0.0532892	0.0423695	0.0482295	0.0595636	0.0412793	0.0335774	0.0297685	0.0306349	0.0302792	0.0370345	0.0543722	0.0643913	0.0627471	0.0510399	0.0479889	0.0464454	0.0413555	0.031848	0.0426451	0.0512225	0.0410347	0.0396025	0.0275742	0.0228941	0.0230348	0.0276153	0.02938	0.0363224	0.0443791	0.0353195	0.0343625	0.039474	0.0519121	0.0506658	0.0522624	0.0451522	0.0533112	0.0555648	0.0592328	0.0506833	0.0515589
34N_1EP	0.122697	0.162202	0.161074	0.136737	0.0436976	0.0357929	0.0312343	0.0284317	0.0253138	0.0320666	0.0309581	0.029951	0.029151	0.0329047	0.0440138	0.0505113	0.0487137	0.040444	0.0402566	0.0357916	0.0314512	0.0285996	0.029929	0.028723	0.0291605	0.030217	0.0293822	0.0130216	0.0163537	0.0192283	0.0229035	0.0185757	0.0241216	0.0391395	0.043732	0.0393917	0.0371429	0.0362608	0.0350279	0.0382905	0.0345179	0.0326743	0.0281138	0.0283487	0.0223101	0.0249577	0.0306503	0.0320574	0.0311456
35N_2AP	0.0188794	0.0180063	0.0183792	0.0155871	0.0366917	0.0558286	0.0528272	0.050111	0.0442264	0.0403087	0.0273783	0.0327833	0.0325993	0.0296619	0.0274364	0.0267955	0.0165406	0.0161451	0.019057	0.0342874	0.0398727	0.0396925	0.0398775	0.0398567	0.0250422	0.0106308	0.0111772	0.015706	0.0169489	0.017784	0.0208682	0.0242631	0.0213554	0.0138148	0.00917846	0.0188375	0.0198979	0.0205084	0.0218341	0.0239145	0.023165	0.0191175	0.0198095	0.0217611	0.0234437	0.0218182	0.0195506	0.0148718	0.012288
36N_2AP	0.0257322	0.0295328	0.0307401	0.0345415	0.0346132	0.035	0.055818	0.0545106	0.0501697	0.0502914	0.0536185	0.0414125	0.0532726	0.0666497	0.0615308	0.0810122	0.082216	0.0780928	0.0688939	0.0659819	0.0573092	0.0563055	0.0770103	0.123429	0.142273	0.157531	0.159294	0.13904	0.0712478	0.0479942	0.0352086	0.0559648	0.0691024	0.0692448	0.0668496	0.100081	0.0894216	0.130296	0.145285	0.141257	0.130296	0.133296	0.0938678	0.0648719	0.0643715	0.0611103	0.0475418	0.0417546	0.0374227
37N_3AP	0.0536208	0.0595272	0.0619784	0.0583484	0.0585106	0.0575795	0.0511256	0.0472052	0.0496611	0.0477535	0.051264	0.0565177	0.0537017	0.0616403	0.0686116	0.0593683	0.0558209	0.0630216	0.0567323	0.0639764	0.0693212	0.192024	0.191256	0.192315	0.194366	0.192867	0.0777467	0.0620337	0.0641224	0.0612663	0.0631927	0.0635559	0.0630256	0.0580044	0.0410166	0.0415709	0.0481925	0.0648262	0.0729562	0.0744053	0.0765522	0.0730162	0.0632421	0.052931	0.0622095	0.0646548	0.0723587	0.105022	0.12551
39N_4AP	0.129119	0.127324	0.0889371	0.0476105	0.0706381	0.0881256	0.0926773	0.0884556	0.0460023	0.0623566	0.060649	0.0630227	0.0538652	0.0506499	0.0747637	0.0809447	0.0857161	0.0819711	0.0559268	0.115398	0.16339	0.182776	0.165719	0.0998028	0.0495096	0.0599505	0.1064	0.165186	0.180892	0.156371	0.107461	0.0609078	0.0537559	0.0392936	0.0478159	0.0539735	0.0492606	0.0540317	0.071013	0.0708081	0.0681785	0.066814	0.0574472	0.057914	0.0503249	0.0431484	0.0303203	0.0345843	0.0331407
41N_1AC	0.0374697	0.0329656	0.0229904	0.0197911	0.0279816	0.0341841	0.0436052	0.0454534	0.0460811	0.0394004	0.0420684	0.0344196	0.0293484	0.0396916	0.0412942	0.0461579	0.0496108	0.0507317	0.0333691	0.0312069	0.0247585	0.0175087	0.016791	0.0182248	0.020835	0.0282057	0.0325762	0.0337545	0.0352832	0.0381154	0.0334972	0.0314727	0.0302438	0.0400874	0.0439402	0.0491265	0.0481259	0.0472027	0.0409424	0.0359502	0.0535068	0.0582383	0.0598471	0.0440164	0.0345842	0.0301922	0.0318724	0.0335191	0.0333385
42N_1EC	0.0299729	0.0288479	0.0371866	0.0550258	0.0497184	0.0578486	0.0755628	0.0717386	0.0432252	0.0377813	0.0486416	0.0430334	0.0436695	0.0385158	0.0424062	0.0430495	0.0303892	0.0275774	0.0302308	0.0296378	0.0347288	0.0472822	0.0472394	0.0294212	0.0229475	0.0193721	0.0186236	0.0213004	0.0189635	0.0187262	0.0290926	0.0325717	0.0275813	0.0302495	0.0290189	0.0259697	0.0251431	0.0206215	0.0222164	0.0257107	0.0290741	0.0257406	0.0298008	0.0334322	0.0379636	0.0335556	0.0248251	0.0256712	0.0288846
43N_2AC	0.0551962	0.0368289	0.0423631	0.0518286	0.0522948	0.0431631	0.0392588	0.0379036	0.0279568	0.040993	0.0764472	0.0757739	0.0901704	0.0968768	0.0952283	0.0680109	0.0663702	0.0419184	0.0340516	0.0335408	0.0330846	0.0273189	0.0306719	0.04052	0.0410795	0.0468667	0.0612655	0.0667608	0.0590834	0.066696	0.0678169	0.0626793	0.0507241	0.0472394	0.0318437	0.0272311	0.0229616	0.0213432	0.0206769	0.0216712	0.0205935	0.0193612	0.0213151	0.0228579	0.0256464	0.0316758	0.0361475	0.0413983	0.0359579
44N_2EC	0.0331478	0.0551434	0.066824	0.0722638	0.071384	0.07213	0.0571862	0.0473868	0.0391206	0.0372446	0.0474518	0.0469306	0.0461514	0.0384764	0.059146	0.0620981	0.0622004	0.0661697	0.0694871	0.0504077	0.0476385	0.0538638	0.0613319	0.0655379	0.0568836	0.031611	0.0301931	0.0317439	0.0314379	0.0401696	0.0396964	0.0499672	0.0447152	0.0340287	0.0473293	0.0398355	0.0418902	0.0380608	0.0395815	0.0314233	0.0268915	0.0224133	0.0213616	0.0227033	0.0264951	0.0498164	0.0750855	0.0869643	0.0851118
45N_3AC	0.0909886	0.0822345	0.0819784	0.101334	0.0904678	0.0656012	0.0644917	0.0659553	0.0564584	0.0520725	0.0733802	0.0777923	0.0750986	0.0966301	0.0891344	0.0843663	0.0812435	0.0848362	0.0831807	0.0841996	0.0861254	0.0823104	0.0790283	0.0683109	0.0651792	0.0724486	0.0576612	0.0666905	0.0636992	0.0774083	0.0680079	0.0750151	0.0980464	0.089878	0.0872093	0.111053	0.134016	0.137969	0.15106	0.141823	0.16096	0.180796	0.136173	0.108241	0.147848	0.161427	0.196606	0.231096	0.215012
46N_3EC	0.0198919	0.0144422	0.0259961	0.0320975	0.0394179	0.0463107	0.0479781	0.0472221	0.0453831	0.045175	0.0280722	0.0201007	0.0244624	0.0329389	0.0374449	0.0400004	0.0512208	0.0725079	0.093666	0.0940091	0.0870141	0.0870109	0.0851756	0.0811269	0.06933	0.0633978	0.0662379	0.0629439	0.0511767	0.0329274	0.0302524	0.0325156	0.0317986	0.036686	0.0367006	0.0394387	0.036123	0.04033	0.0455937	0.0559047	0.0550658	0.0548588	0.0514371	0.0418156	0.0539393	0.0643365	0.063194	0.0655446	0.0390567
49N_1AP	0.0807903	0.0787175	0.0825371	0.0992286	0.107019	0.100772	0.10393	0.10366	0.0695565	0.0588463	0.0590866	0.061577	0.0692264	0.0686403	0.0750547	0.0705806	0.0671245	0.0567253	0.0560811	0.0518147	0.0690989	0.0892123	0.10357	0.105003	0.102002	0.0925529	0.0615522	0.0389362	0.0279034	0.0556012	0.0771616	0.0742268	0.074032	0.0646382	0.0624831	0.0606756	0.0594489	0.121244	0.137066	0.142716	0.136434	0.115272	0.0864928	0.0900342	0.0697147	0.0894356	0.0964369	0.101534	0.0949996
50N_1EP	0.132918	0.131129	0.105789	0.0390722	0.0431182	0.0532006	0.0524536	0.0557466	0.0533765	0.0478057	0.0519644	0.0475348	0.0448309	0.0454051	0.0532984	0.0352004	0.0332924	0.046466	0.0663055	0.0749309	0.0761765	0.120976	0.146153	0.143274	0.122268	0.100586	0.0940624	0.0481455	0.0342648	0.0329723	0.0289837	0.0236015	0.023425	0.0205726	0.014555	0.014177	0.0160415	0.0160483	0.0169352	0.0235397	0.0240268	0.0240445	0.0259687	0.0303258	0.0244608	0.0235547	0.0220283	0.0245403	0.0244202
51N_2AP	0.0150225	0.0206257	0.0190664	0.0193748	0.016471	0.0187463	0.0243861	0.036287	0.0421297	0.0419934	0.0324906	0.0283834	0.0331401	0.0407524	0.0471877	0.0465386	0.0386521	0.0333915	0.0259243	0.0198109	0.018241	0.0188985	0.0193805	0.0187845	0.018908	0.0171241	0.0153934	0.0144264	0.0158233	0.0268163	0.0318305	0.0287663	0.0230656	0.0238403	0.0240659	0.0139701	0.0137218	0.0148974	0.0146588	0.015658	0.0149215	0.0155261	0.0127462	0.015548	0.0147234	0.0157041	0.0120887	0.012841	0.0132172
52N_2EP	0.0334586	0.030299	0.0536728	0.0826144	0.100064	0.0889995	0.0529889	0.0477003	0.0523821	0.0417255	0.0462792	0.048524	0.0453202	0.0435147	0.045172	0.0409176	0.0342923	0.0385702	0.0386792	0.0368621	0.0411279	0.0534032	0.0435427	0.0509194	0.0704994	0.0768325	0.0657637	0.0633602	0.0400826	0.0478525	0.0696177	0.083841	0.0851738	0.0990828	0.109259	0.118013	0.0996381	0.0670349	0.0643907	0.0992177	0.143268	0.18153	0.179427	0.142882	0.147818	0.230899	0.233736	0.194801	0.0732673
53N_3AP	0.0383635	0.0382588	0.0282732	0.0292696	0.0298837	0.0250097	0.0193237	0.029559	0.0371803	0.0323713	0.0314267	0.0258982	0.0279157	0.0320128	0.0395531	0.0543006	0.04295	0.0417596	0.0458244	0.0463903	0.0457015	0.0435257	0.0505964	0.0495885	0.047568	0.0348234	0.032842	0.0269838	0.0218145	0.0200915	0.0260452	0.0286043	0.0279052	0.0309422	0.0365679	0.0278435	0.0235064	0.0178357	0.0251272	0.0221172	0.0245436	0.0356229	0.0389781	0.0373432	0.0386499	0.0354865	0.0308231	0.0325533	0.0320993
54N_3EP	0.041754	0.0416639	0.040765	0.0446797	0.0520175	0.0408098	0.041421	0.0399161	0.0376179	0.0349277	0.0332624	0.027917	0.0296465	0.031357	0.0332159	0.0332683	0.0235154	0.0236872	0.0359712	0.0391563	0.0375255	0.0318262	0.0295203	0.037178	0.0388174	0.0394305	0.0420106	0.0425188	0.0429807	0.0453194	0.0567757	0.0894957	0.125023	0.13055	0.117493	0.0498643	0.0299237	0.0363472	0.0345345	0.0343742	0.0345775	0.0368363	0.0361081	0.0396677	0.0376222	0.037143	0.0579937	0.13277	0.124261
55N_4AP	0.0743012	0.0877516	0.0910656	0.0910004	0.06988	0.0794402	0.0838356	0.0829225	0.0672854	0.0603138	0.0813597	0.0831656	0.0811139	0.0771529	0.0611356	0.0539694	0.0602191	0.086699	0.0903662	0.108921	0.105355	0.0729788	0.0630328	0.0615938	0.0582354	0.0578885	0.0633136	0.0712392	0.082952	0.0957118	0.107204	0.11402	0.0927464	0.0992157	0.105125	0.117793	0.100119	0.0749243	0.0735549	0.070943	0.0775577	0.0765417	0.0679088	0.0801889	0.0952787	0.103853	0.0921919	0.0664304	0.0651009
56N_4EP	0.0323336	0.0314791	0.0384542	0.0387104	0.0294259	0.0299766	0.0315771	0.0299911	0.0300053	0.0320531	0.0322162	0.0346067	0.0313803	0.025826	0.026349	0.0235135	0.0272755	0.0299417	0.0305597	0.0296972	0.0253927	0.0340076	0.03962	0.101355	0.152368	0.158074	0.164867	0.161083	0.136624	0.0605521	0.0295435	0.0192775	0.0189456	0.020733	0.0310072	0.0337153	0.0333308	0.0332673	0.0343559	0.0284657	0.0160463	0.0163265	0.0178006	0.018151	0.0198488	0.0217422	0.0211321	0.0213769	0.0232691
58N_1EC	0.0375012	0.0356957	0.046031	0.0432624	0.051504	0.0513339	0.0507332	0.0407931	0.0301537	0.0314034	0.0291164	0.0336466	0.035694	0.0534367	0.0551635	0.0611263	0.0639348	0.0628794	0.0534785	0.0388877	0.0240448	0.0295881	0.0376166	0.0465786	0.0494975	0.0448952	0.041546	0.0451954	0.0387362	0.0353863	0.0359423	0.0373046	0.0360365	0.030602	0.0269377	0.0379919	0.0366078	0.0354203	0.0379143	0.0400751	0.0350806	0.0304111	0.0307739	0.030725	0.0412294	0.0377658	0.033003	0.0775358	0.106612
60N_2EC	0.0824312	0.0817752	0.0693378	0.0606843	0.0351167	0.0417286	0.0459928	0.0489207	0.0407205	0.0440631	0.0328384	0.0326428	0.0301022	0.0419605	0.0831057	0.110321	0.115554	0.0868201	0.0460778	0.019748	0.0240872	0.0238947	0.0246516	0.024367	0.0240471	0.0239487	0.0236534	0.0406039	0.0785782	0.0789244	0.0752411	0.0720575	0.0676278	0.0232519	0.0209587	0.0167007	0.0146819	0.0147995	0.0145528	0.0169616	0.0188712	0.023101	0.0217882	0.0189029	0.0220196	0.0231048	0.0251536	0.0326009	0.0300074
61N_3AC	0.0865273	0.0934204	0.0998717	0.0840486	0.0906991	0.0942186	0.086641	0.0866821	0.101377	0.10457	0.101971	0.103803	0.102013	0.095059	0.0969151	0.0878389	0.0735241	0.0509357	0.068175	0.0630955	0.0609754	0.0653764	0.112825	0.107272	0.0981461	0.107564	0.0837236	0.0873423	0.0974536	0.0902301	0.0778151	0.074514	0.0644378	0.0648655	0.0682113	0.0548268	0.0599799	0.0610548	0.0637103	0.0758843	0.0794627	0.112247	0.122248	0.120518	0.127742	0.128227	0.0910291	0.11473	0.109904
63N_4AC	0.0672394	0.069153	0.0567756	0.0544203	0.0542507	0.0709638	0.0941277	0.0884949	0.0852994	0.0811883	0.079465	0.0711836	0.0692247	0.0698286	0.0673831	0.0954624	0.0929658	0.0805585	0.0509554	0.049068	0.0427818	0.04625	0.113336	0.120326	0.110106	0.10784	0.107528	0.0753348	0.0632217	0.0608378	0.0598874	0.058615	0.0527038	0.039288	0.0445807	0.0452104	0.0594285	0.0596304	0.0580607	0.0577726	0.060535	0.0471969	0.0434537	0.0466622	0.0718019	0.077341	0.0747546	0.0572768	0.0561987
64N_4EC	0.0273726	0.0276166	0.0274336	0.0242466	0.0249866	0.0189879	0.0257036	0.0260339	0.0260895	0.0238136	0.0254382	0.0221608	0.0231646	0.0267907	0.0262941	0.0236468	0.0169944	0.017088	0.0153351	0.0253246	0.027365	0.0268633	0.0249884	0.0268015	0.0200704	0.0271445	0.0281166	0.0384228	0.0431503	0.0435855	0.0289709	0.0285083	0.0326919	0.0315643	0.0274963	0.0199048	0.027794	0.0253834	0.0202185	0.0145731	0.0140227	0.017582	0.0187401	0.0202344	0.0194792	0.0174865	0.0168688	0.0149406	0.0147177
65N_1AP	0.0744352	0.0718517	0.06105	0.0379971	0.0351439	0.028973	0.025823	0.0297742	0.0330146	0.0324726	0.0323702	0.0298114	0.0537457	0.0641556	0.0561262	0.0552831	0.0602671	0.0482861	0.0247374	0.0302836	0.0315259	0.0385511	0.0451942	0.0487091	0.0460969	0.044198	0.0485699	0.0537326	0.0578745	0.0417138	0.0326337	0.0330235	0.0348774	0.037887	0.0388916	0.0420368	0.0446228	0.0565783	0.0442208	0.0427934	0.0534235	0.0644592	0.0639569	0.0639207	0.0638047	0.0644646	0.0456488	0.047249	0.0467496
66N_1EP	0.0587555	0.0655363	0.0712491	0.089335	0.0841579	0.0850625	0.0971548	0.1575	0.147911	0.141539	0.137311	0.143065	0.0622043	0.0497596	0.0471091	0.0388388	0.0341121	0.0292879	0.0364958	0.0453822	0.0464948	0.0390024	0.030776	0.0296002	0.0299426	0.0297853	0.0308989	0.0294408	0.0219147	0.0254802	0.0331616	0.0395152	0.0394684	0.0381081	0.0647956	0.0769008	0.0803613	0.0517252	0.0316613	0.0351626	0.0373861	0.03983	0.0465926	0.0331335	0.029474	0.0311135	0.0348945	0.0337107	0.0349682
67N_2AP	0.184703	0.18505	0.138085	0.109324	0.09375	0.103994	0.0578049	0.070918	0.10627	0.115642	0.126917	0.126691	0.119582	0.0889684	0.0833054	0.072794	0.0697638	0.0688113	0.079805	0.0606689	0.0617199	0.0852202	0.121624	0.143131	0.130463	0.107808	0.0750868	0.125982	0.160712	0.154978	0.12056	0.108564	0.100811	0.0915394	0.0936437	0.0893816	0.0975464	0.143063	0.167493	0.180013	0.176172	0.106024	0.0982287	0.0889283	0.0943091	0.0920608	0.101797	0.081466	0.0669039
68N_2EP	0.054838	0.0521826	0.0465493	0.037002	0.032639	0.0436168	0.0506629	0.0448455	0.0501617	0.0706597	0.0726992	0.0769365	0.0814215	0.0893394	0.0870892	0.0743018	0.0678446	0.081976	0.0998899	0.113463	0.0983229	0.0802568	0.100699	0.118964	0.125528	0.127657	0.122261	0.122747	0.115633	0.085703	0.0802249	0.0714408	0.0903462	0.0976117	0.130089	0.131821	0.107835	0.115945	0.145638	0.134957	0.102486	0.0997211	0.092346	0.134174	0.154215	0.174224	0.143267	0.0700323	0.054083
70N_3EP	0.0369119	0.0572045	0.0606387	0.0590303	0.0490906	0.0433673	0.02827	0.0206844	0.0253934	0.0307073	0.0394745	0.0530527	0.0549689	0.0516829	0.037702	0.0392973	0.037475	0.0365248	0.0342231	0.0317376	0.0303652	0.025964	0.0259327	0.033106	0.0328213	0.0387732	0.0528617	0.0561761	0.0563294	0.0609956	0.0405177	0.0340236	0.038555	0.0433791	0.0420321	0.0442618	0.0478809	0.0486891	0.0470649	0.034117	0.0274908	0.027633	0.0458448	0.0579644	0.0595603	0.0441194	0.0333671	0.0413444	0.0486558
72N_4EP	0.0239955	0.0256323	0.0247305	0.0241753	0.021836	0.0194633	0.0226465	0.0277866	0.0284432	0.0445458	0.0462014	0.0668118	0.0896437	0.0886134	0.0931797	0.0841149	0.0586928	0.0684052	0.121233	0.120765	0.111195	0.103817	0.0904777	0.0876379	0.0770807	0.0708271	0.043595	0.0568856	0.0882854	0.111912	0.10195	0.0715041	0.0405331	0.0407888	0.0464088	0.0853045	0.10831	0.109637	0.0894975	0.0309665	0.0258473	0.0807975	0.0887239	0.0880835	0.0884456	0.0858424	0.0437019	0.0269405	0.0270208
73N_1AC	0.0595833	0.0672092	0.0800683	0.075069	0.0697075	0.0637999	0.0525527	0.0223102	0.0175004	0.0262942	0.0265217	0.0261184	0.0302478	0.0290428	0.0271724	0.0294019	0.0254313	0.0280513	0.020786	0.0217338	0.022197	0.0279853	0.0254952	0.0277386	0.0287902	0.0279071	0.0245031	0.0254327	0.0261765	0.0249791	0.0255238	0.0263497	0.0194187	0.0178049	0.0168456	0.016653	0.024022	0.0244972	0.0270795	0.0265027	0.027406	0.0227568	0.0252313	0.0259447	0.0251425	0.0234591	0.0227308	0.0160167	0.0276383
74N_1EC	0.0283081	0.0270849	0.0299388	0.0258854	0.0282634	0.0327249	0.0313231	0.0265456	0.0243867	0.0284694	0.0239738	0.023408	0.0257226	0.0268196	0.0303633	0.0376909	0.0393588	0.0378668	0.0358396	0.0451	0.0438198	0.0403485	0.0399949	0.0400137	0.0244061	0.0245433	0.0231621	0.0239679	0.027516	0.0328312	0.0316016	0.0352388	0.030821	0.0301026	0.0475719	0.0631299	0.067594	0.0756922	0.0855685	0.0975915	0.118791	0.116047	0.108461	0.11138	0.115307	0.124914	0.123061	0.117532	0.0541886
75N_2AC	0.0348153	0.065938	0.076969	0.0714208	0.0521516	0.0480932	0.097054	0.0968854	0.0985022	0.113709	0.115056	0.0738701	0.0857439	0.0807464	0.0596507	0.0554945	0.0684825	0.0653579	0.0591612	0.0713811	0.080212	0.0792144	0.073949	0.0631576	0.0728492	0.0744343	0.0661438	0.0425297	0.0352773	0.0469594	0.0460977	0.0359418	0.0337162	0.036518	0.0333673	0.0499035	0.0446206	0.0402677	0.037602	0.0323453	0.036379	0.0356366	0.0368356	0.0999167	0.0955149	0.0897448	0.086093	0.07975	0.0661547
76N_3EC	0.146513	0.175832	0.177957	0.179243	0.128106	0.116993	0.119686	0.141854	0.159092	0.182933	0.143076	0.126103	0.0971965	0.0893755	0.103298	0.0976088	0.0907942	0.0894355	0.0894085	0.070807	0.0564892	0.0676954	0.0693484	0.0705123	0.0754773	0.0686862	0.0701094	0.0768095	0.0685115	0.0674545	0.0738669	0.0730713	0.0744136	0.0780739	0.0787766	0.0809819	0.0785524	0.0624724	0.0614817	0.0481216	0.0525859	0.0492766	0.0453565	0.0614986	0.094755	0.109042	0.105975	0.0930502	0.0795729
77N_3AC	0.0653326	0.0519285	0.0408282	0.037285	0.059876	0.0581797	0.0780232	0.0936575	0.0961166	0.0818636	0.0862535	0.0884954	0.0981269	0.10407	0.11123	0.160337	0.186365	0.169987	0.150597	0.105392	0.121386	0.129141	0.164582	0.160645	0.0912938	0.0589735	0.0594581	0.0724077	0.0710481	0.0683642	0.0464932	0.0628697	0.0601289	0.0653563	0.0722204	0.073161	0.0576601	0.0590832	0.0561601	0.0501386	0.0555808	0.0578495	0.0558785	0.0579992	0.140005	0.163195	0.156044	0.135723	0.144915
79N_4AC	0.138246	0.137779	0.132475	0.0844094	0.0512646	0.0465931	0.0422649	0.0527493	0.0658124	0.0702783	0.0690563	0.0638755	0.0428482	0.0401107	0.0394696	0.0372793	0.0556809	0.054562	0.0539207	0.0584334	0.0639008	0.0660188	0.114145	0.11715	0.125847	0.138563	0.143742	0.0911881	0.0614297	0.0556391	0.0514013	0.0544558	0.0569657	0.0481732	0.0452539	0.0494147	0.0454359	0.038132	0.0470309	0.0550497	0.0533898	0.0573089	0.0799242	0.0905709	0.0865372	0.0764469	0.0484784	0.0768314	0.102608
80N_4EC	0.0758015	0.0671315	0.0720088	0.0728211	0.0870536	0.0771097	0.0615985	0.0471046	0.0443527	0.0471694	0.0782826	0.0889187	0.0744797	0.0570305	0.0406207	0.0446279	0.0452859	0.046211	0.0468009	0.0403887	0.036448	0.0304403	0.0371475	0.0468861	0.0494637	0.0515067	0.0626261	0.054843	0.0543023	0.0574258	0.0714655	0.0581012	0.0588505	0.0554382	0.0495197	0.0513554	0.0515257	0.0585132	0.0524799	0.0539239	0.0682407	0.0706734	0.0762579	0.0796882	0.0777803	0.0420649	0.036734	0.0389019	0.0539737
83N_2EC	0.0345786	0.0308636	0.0292469	0.0348825	0.0334076	0.026533	0.0300389	0.0297102	0.0230273	0.0259985	0.0258975	0.0249807	0.0289567	0.0270844	0.0349014	0.0396366	0.0419494	0.0419086	0.0419614	0.0351969	0.0219986	0.0227525	0.0235242	0.0493885	0.0997205	0.146202	0.164333	0.141187	0.103601	0.0601843	0.0410607	0.0371977	0.0558899	0.151927	0.223059	0.228784	0.208907	0.0877819	0.0409054	0.038887	0.0217455	0.0194114	0.0187489	0.0152489	0.0160997	0.0200379	0.0198612	0.0201818	0.0199994
84N_4EP	0.0322369	0.0316796	0.0266131	0.035711	0.0330778	0.0338451	0.0377941	0.037897	0.0395737	0.0586976	0.0624209	0.0659097	0.0814501	0.0853563	0.0901173	0.0914366	0.0770453	0.0296077	0.0239156	0.0214179	0.0223552	0.0258992	0.0292899	0.0302473	0.0811742	0.167505	0.203214	0.23604	0.208796	0.137465	0.105824	0.0856873	0.184235	0.301231	0.354599	0.338589	0.18993	0.0292527	0.0314336	0.0303067	0.0299017	0.0371043	0.0462851	0.0401753	0.0347279	0.0338341	0.0321029	0.0261698	0.0261582
[truncated: 8 more columns]
